# Supplementary material for: Synthesis, antimicrobial and antioxidant activity of triazole, pyrazole containing thiazole Derivatives and Molecular docking studies on COVID-19
Source: Research Square preprint supplement (doi:10.21203/rs.3.rs-1522886/v1), 2022-04-26
Supplement: Supplementary file 1 [file 1defb768eacd7a5b91f73917.docx]

**Synthesis, antimicrobial and antioxidant activity of triazole, pyrazole contain thiazole Derivatives and Molecular docking studies on COVID-19**

Matta Raghavender1, Jalapathi Pochampally1, Bala NarsimhaDhoddi1,Bhookya Shankar2,Sampath Bitla3, Anjini Gayatri Akkiraju4

1 Department of Chemistry, Osmania University, Hyderabad, Telangana, 500007, India

2School of Chemistry, University of Hyderabad, Central University, Telangana, 500046 India

3 Department of Chemistry, Nizam College, Osmania University, Hyderabad, Telangana, 500001, India

4Molecular Medicine Lab, Dept. of Genetics & Biotechnology, Osmania University, Hyderabad, Telangana, 500007, India

Corresponding author Email: pochampalli.ou.chemi@gmail.com


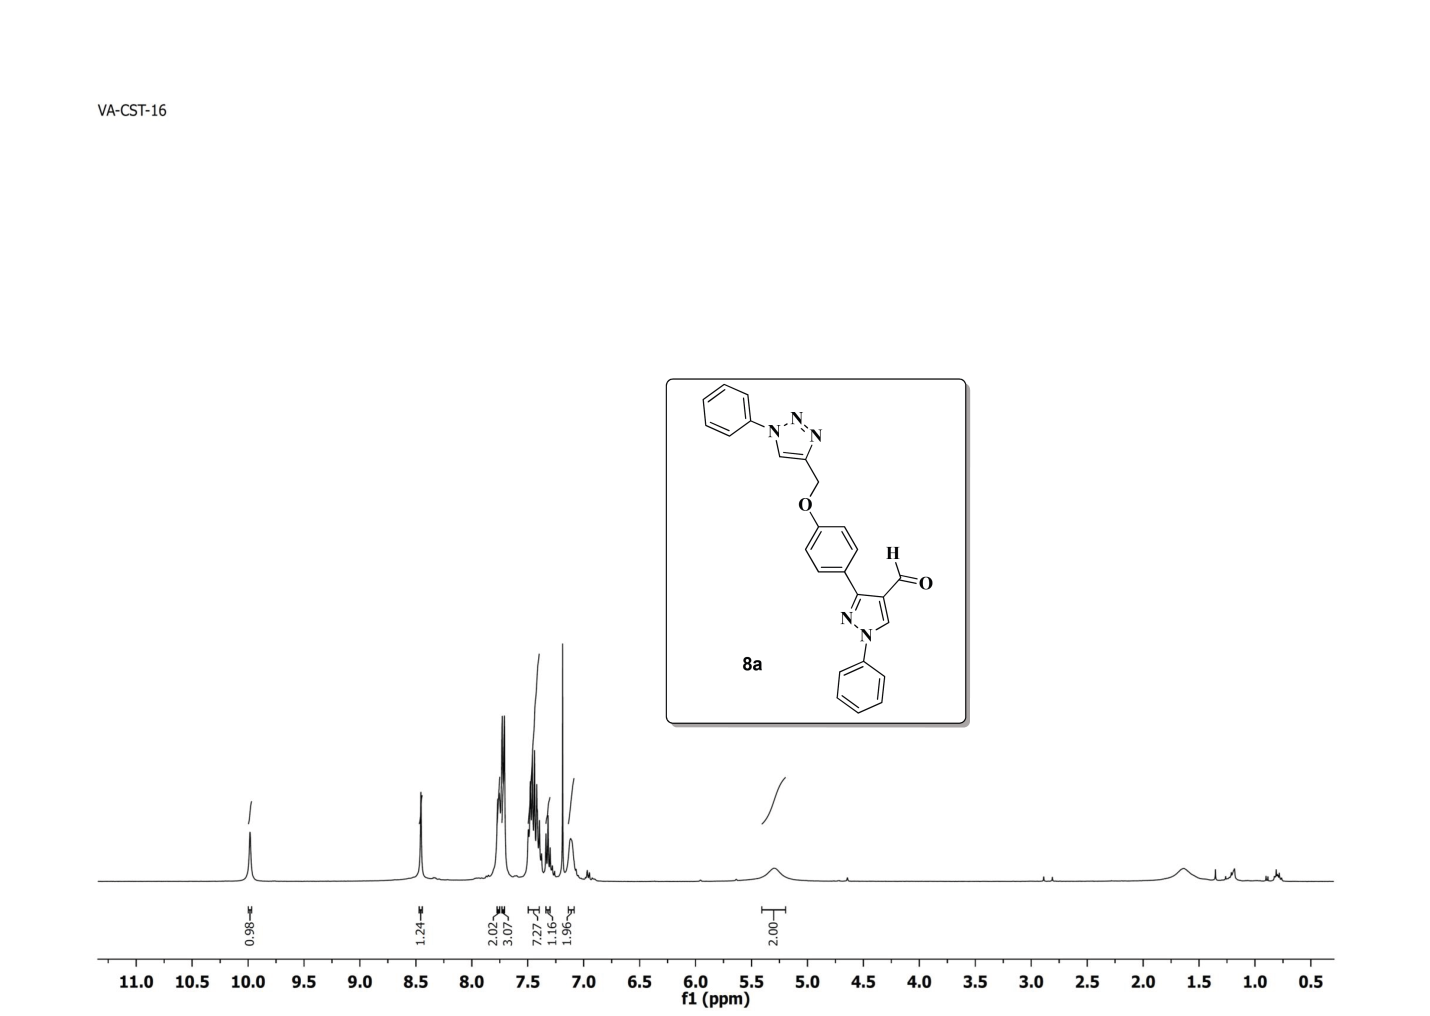
**1H NMR Spectrum of compound 8a (400 MHz, CDCl3)**


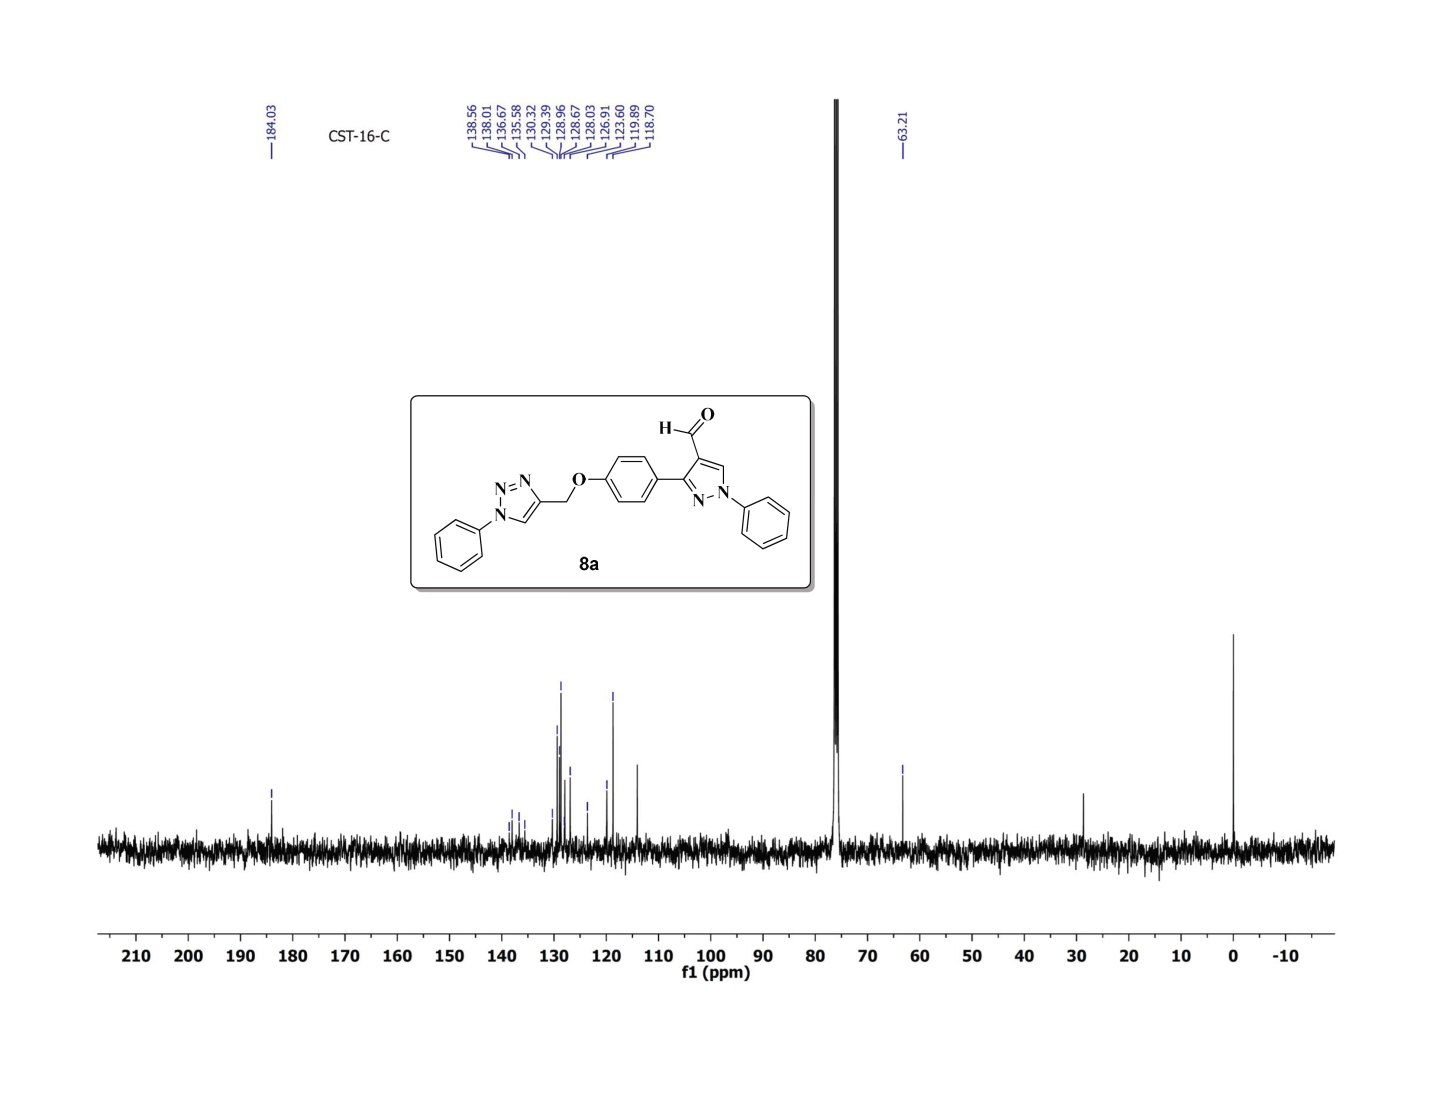
**13C NMR Spectrum of compound 8a (100 MHz, CDCl3)**


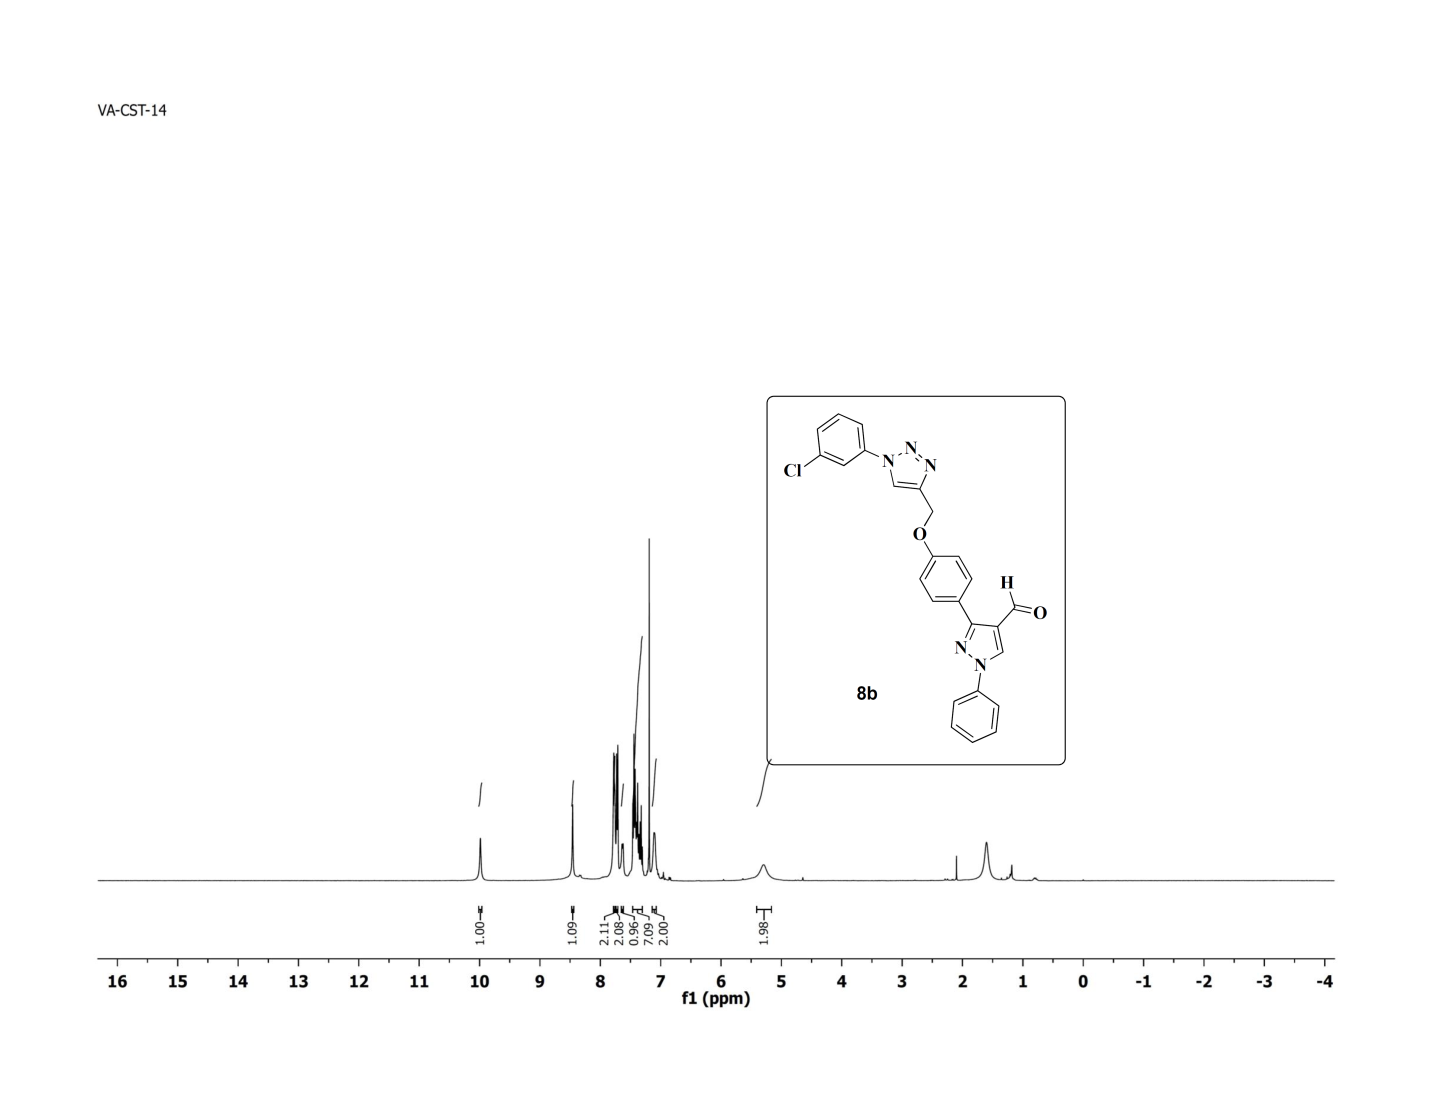
**1H NMR Spectrum of compound 8b (400 MHz, CDCl3)**


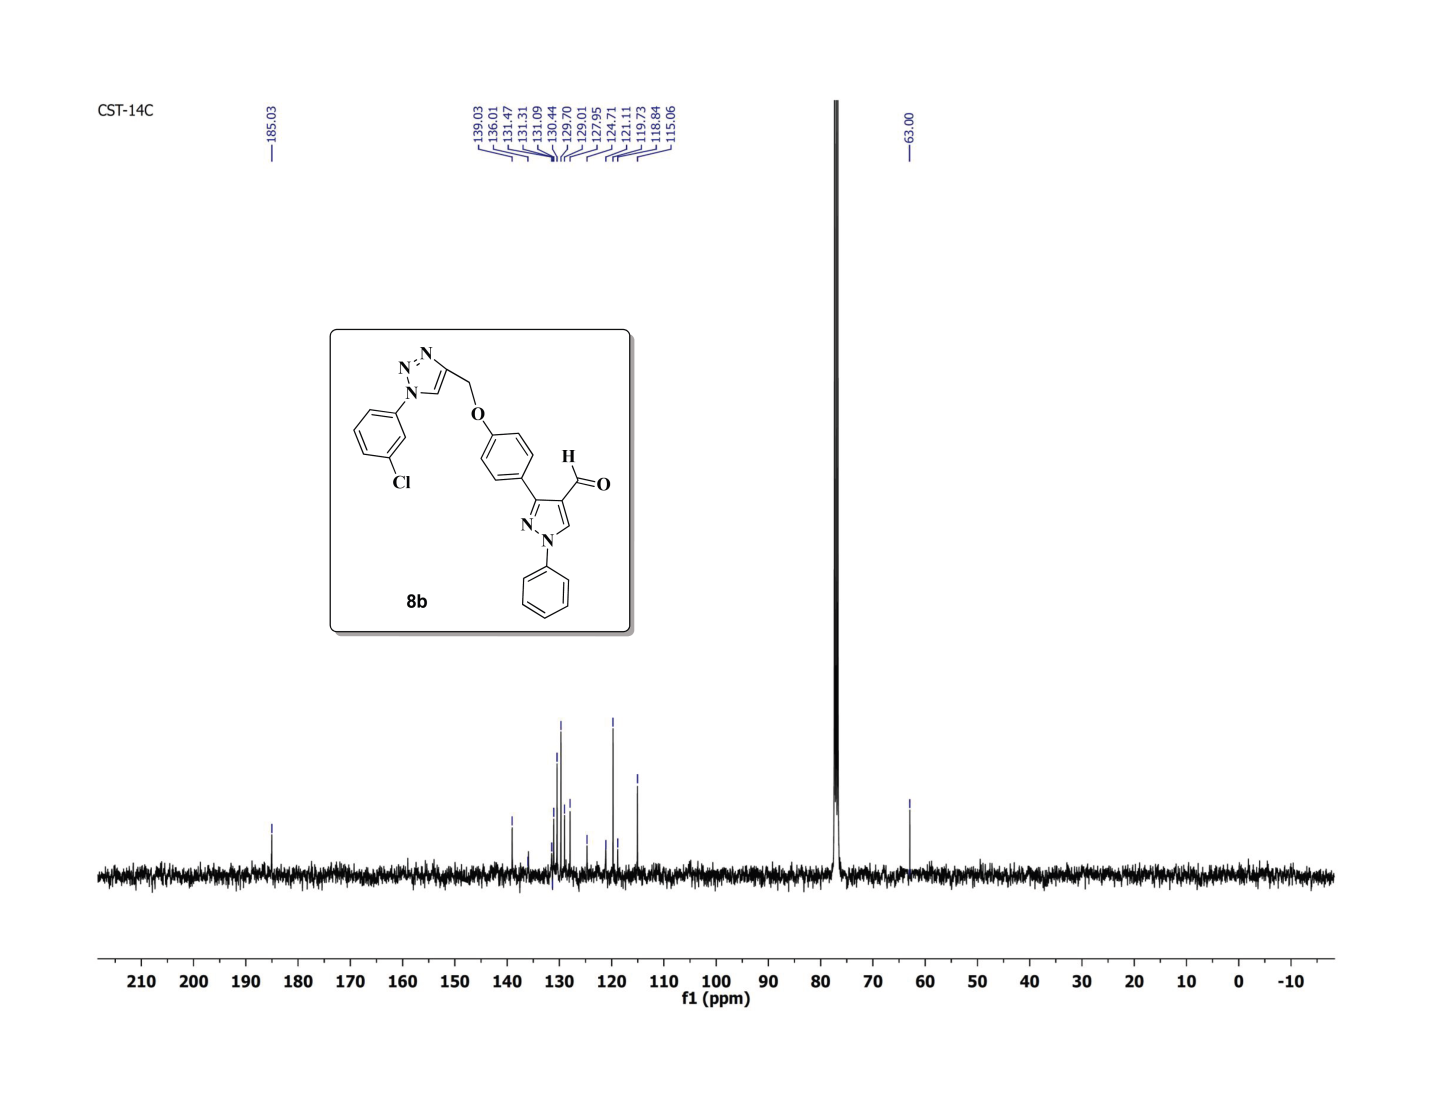
**13C NMR Spectrum of compound 8b (100 MHz, CDCl3)**


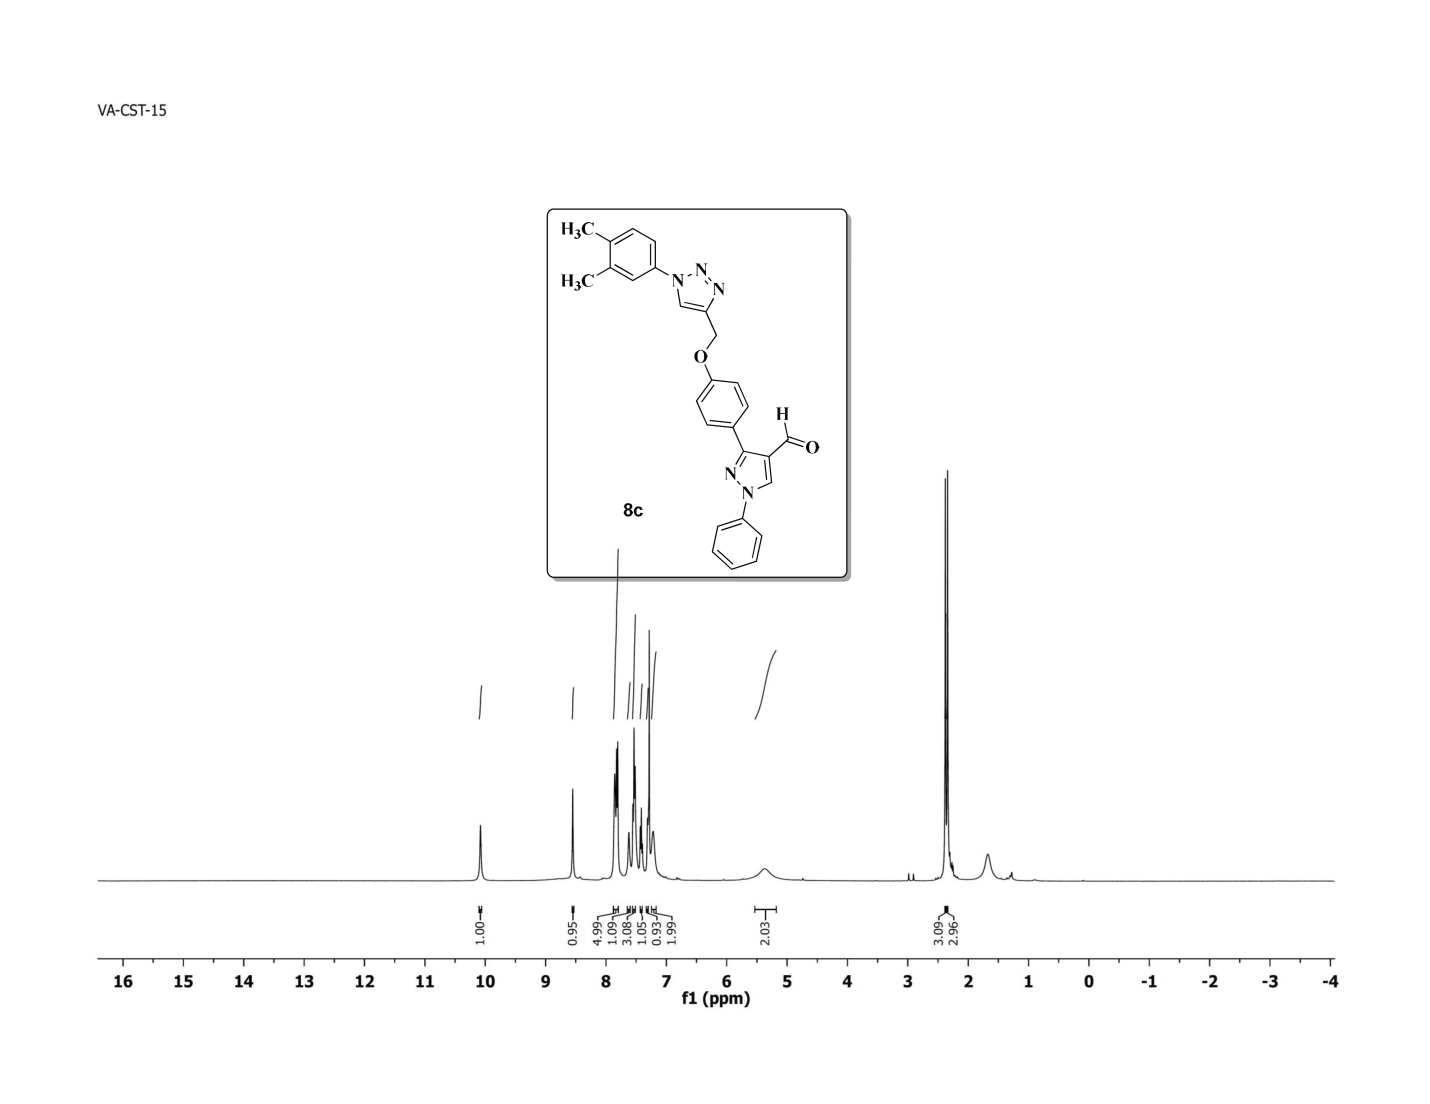
**1H NMR Spectrum of compound 8c (400 MHz, CDl3)**


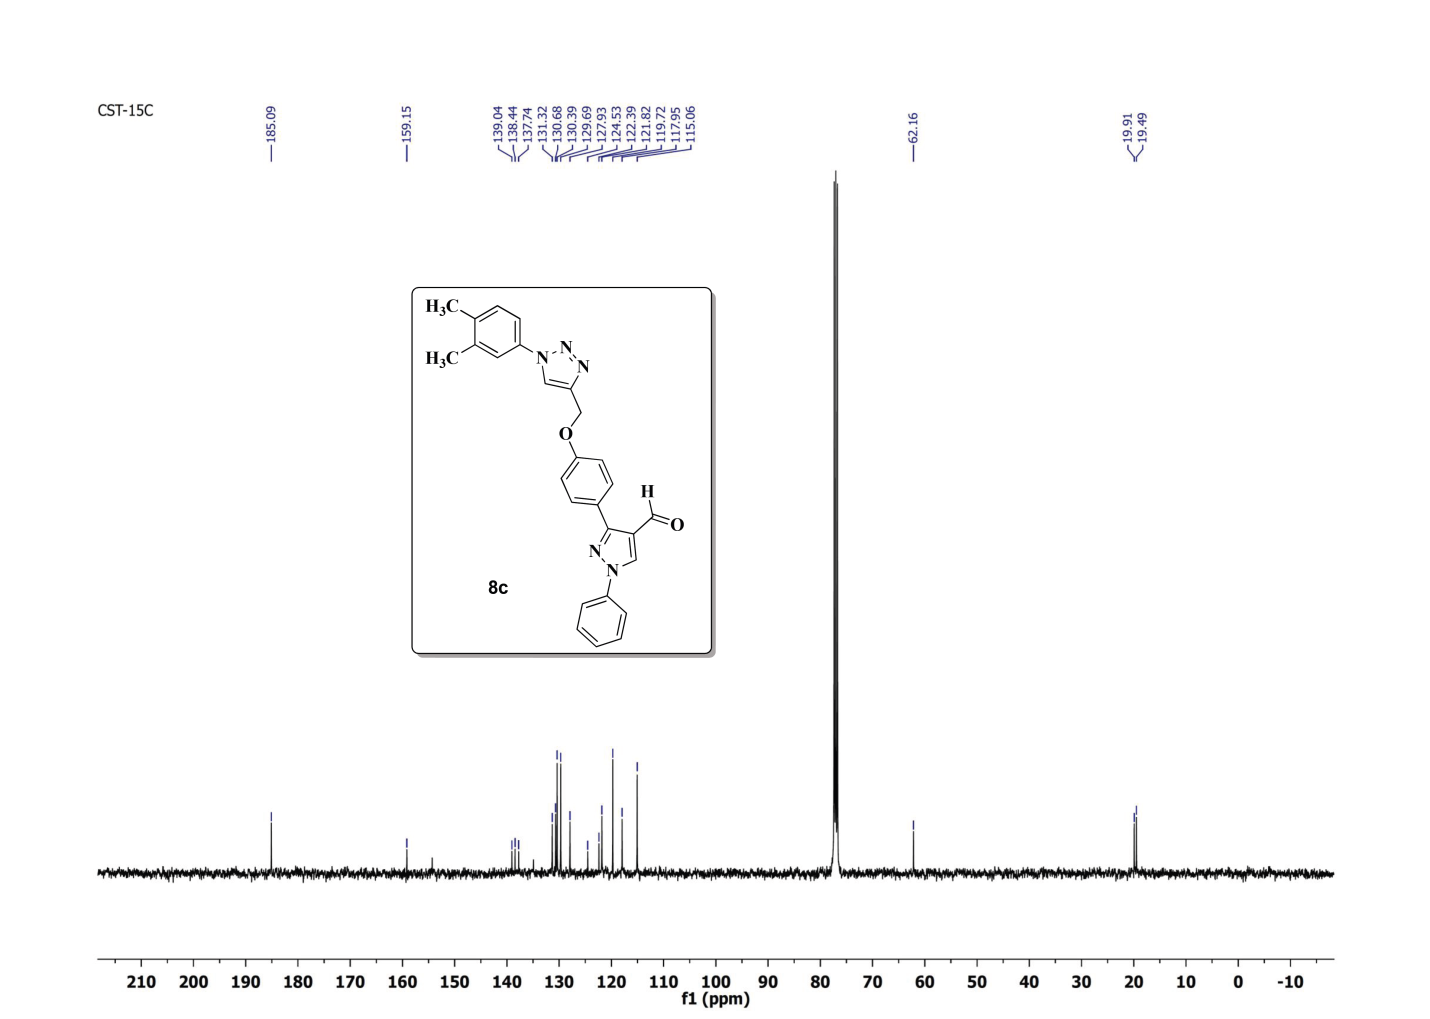
**13C NMR Spectrum of compound 8c (100 MHz, CDCl3)**


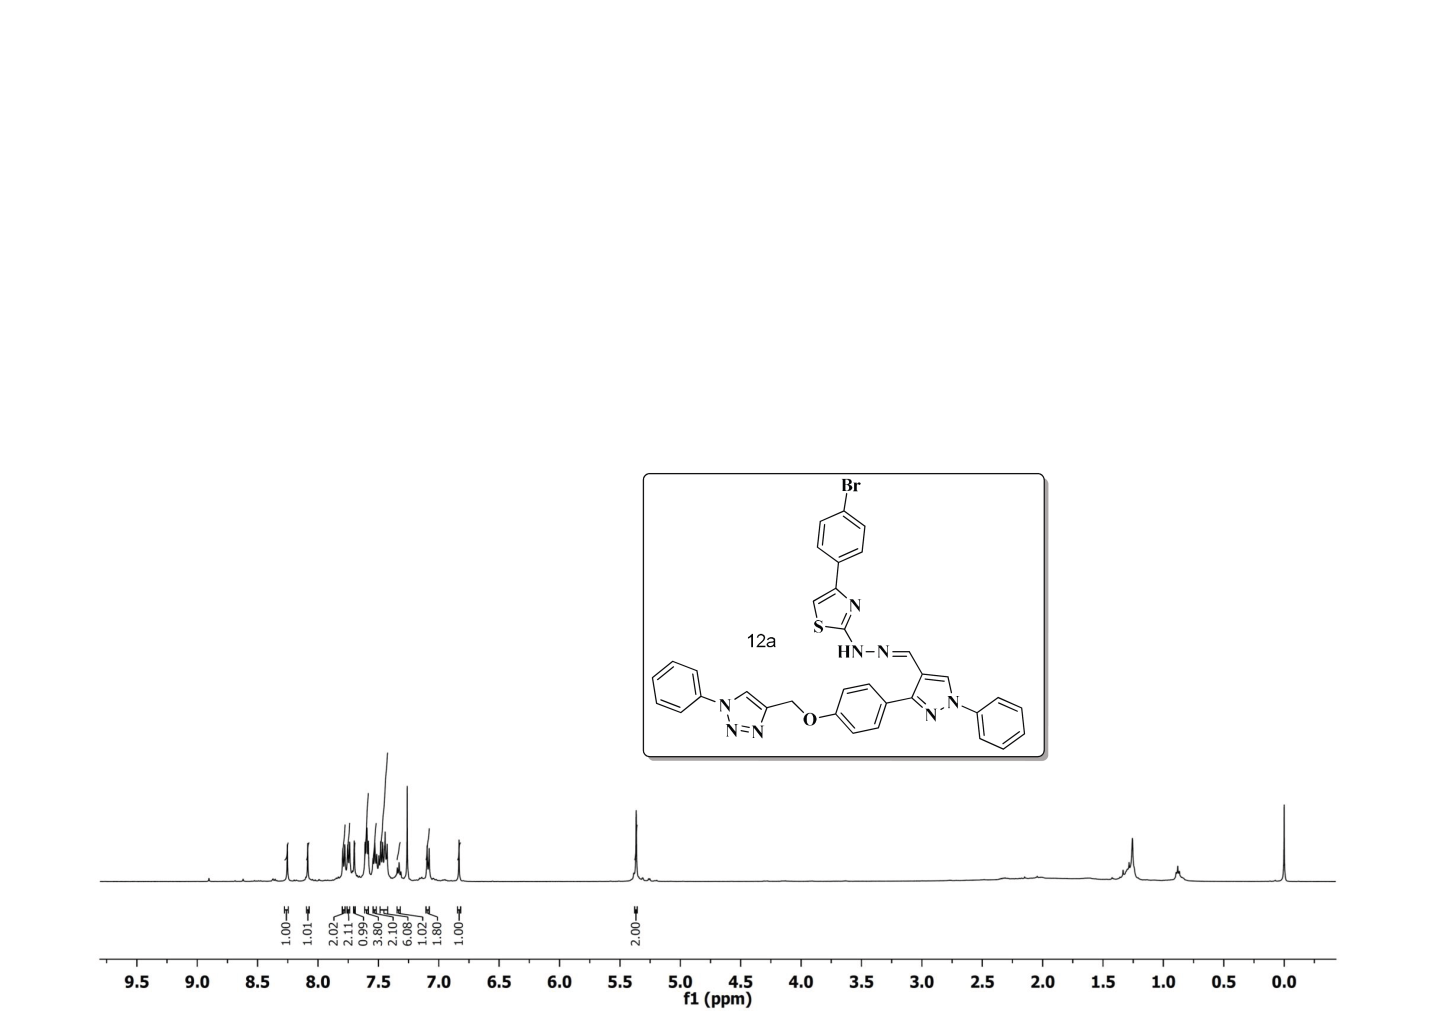


**1H NMR Spectrum of compound 12a (400 MHz, CDCl3)**


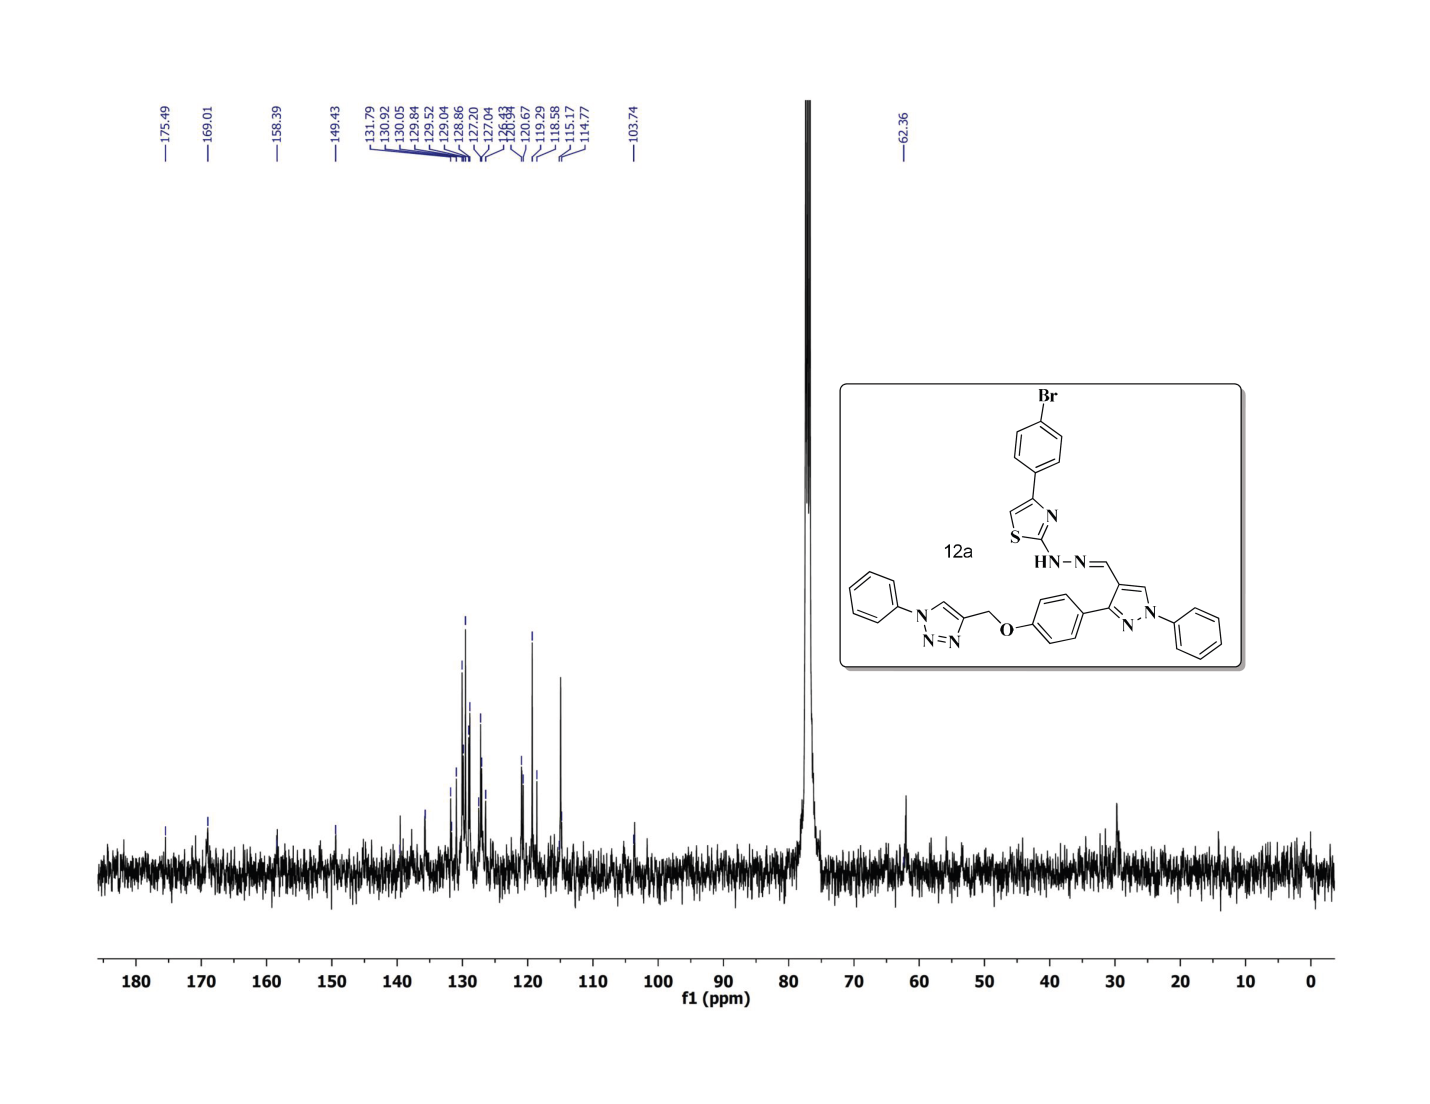
**13C NMR Spectrum of compound 12a(100 MHz, CDCl3)**


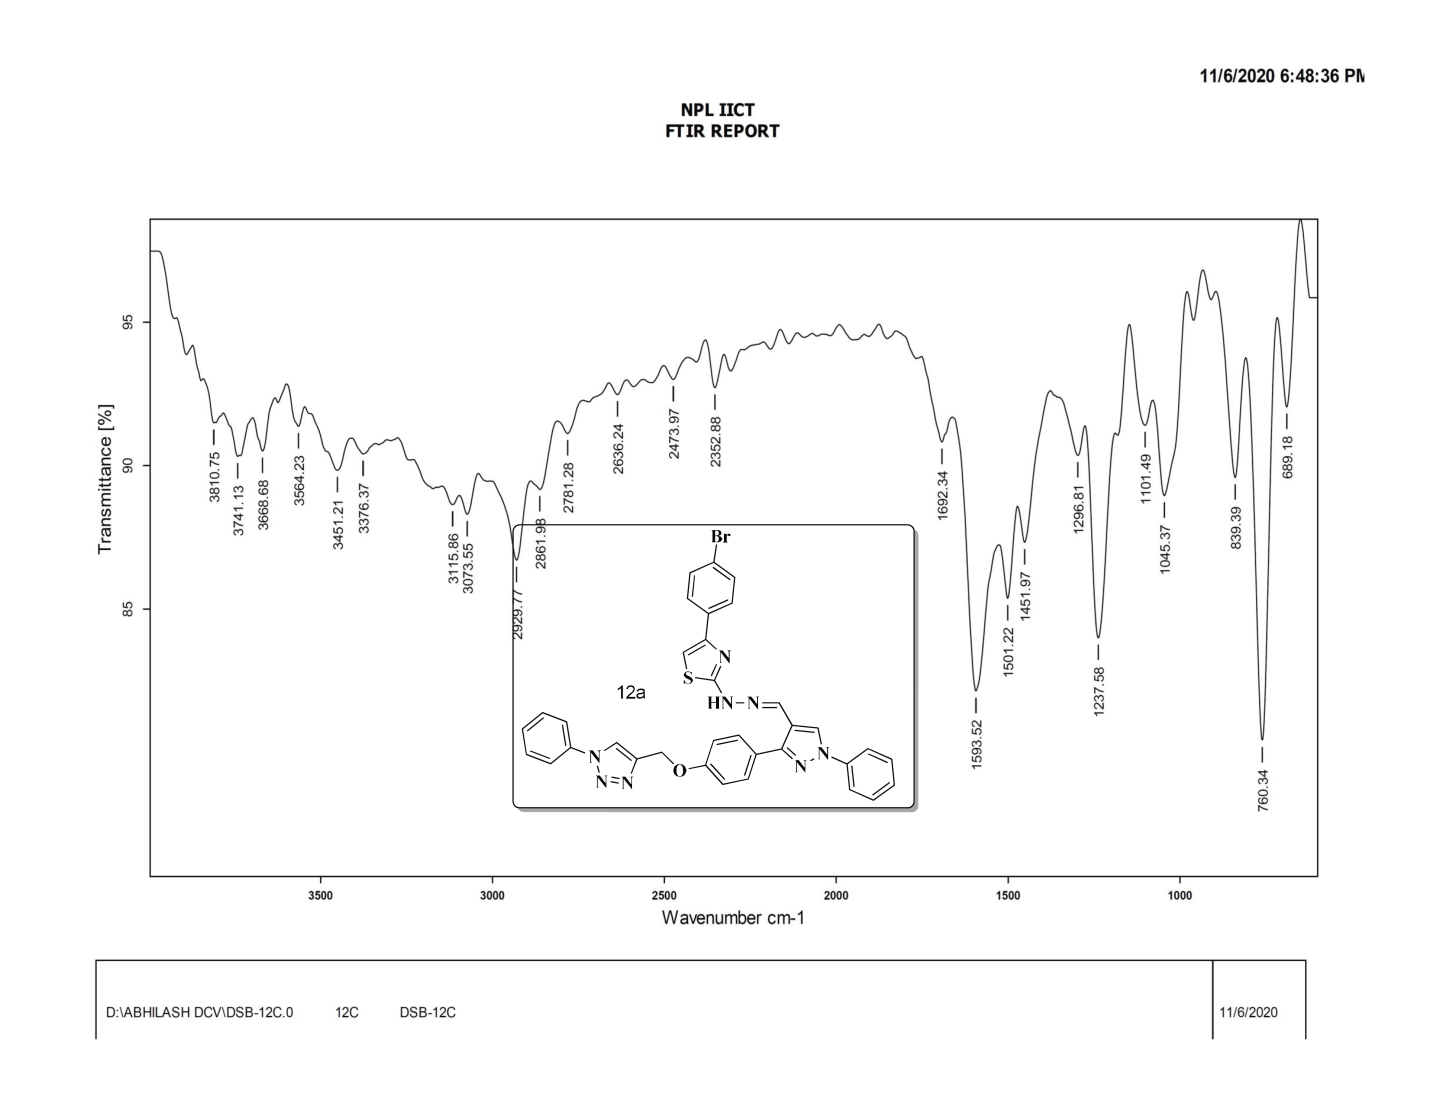
**FT-IR Spectrum of compound 10a**


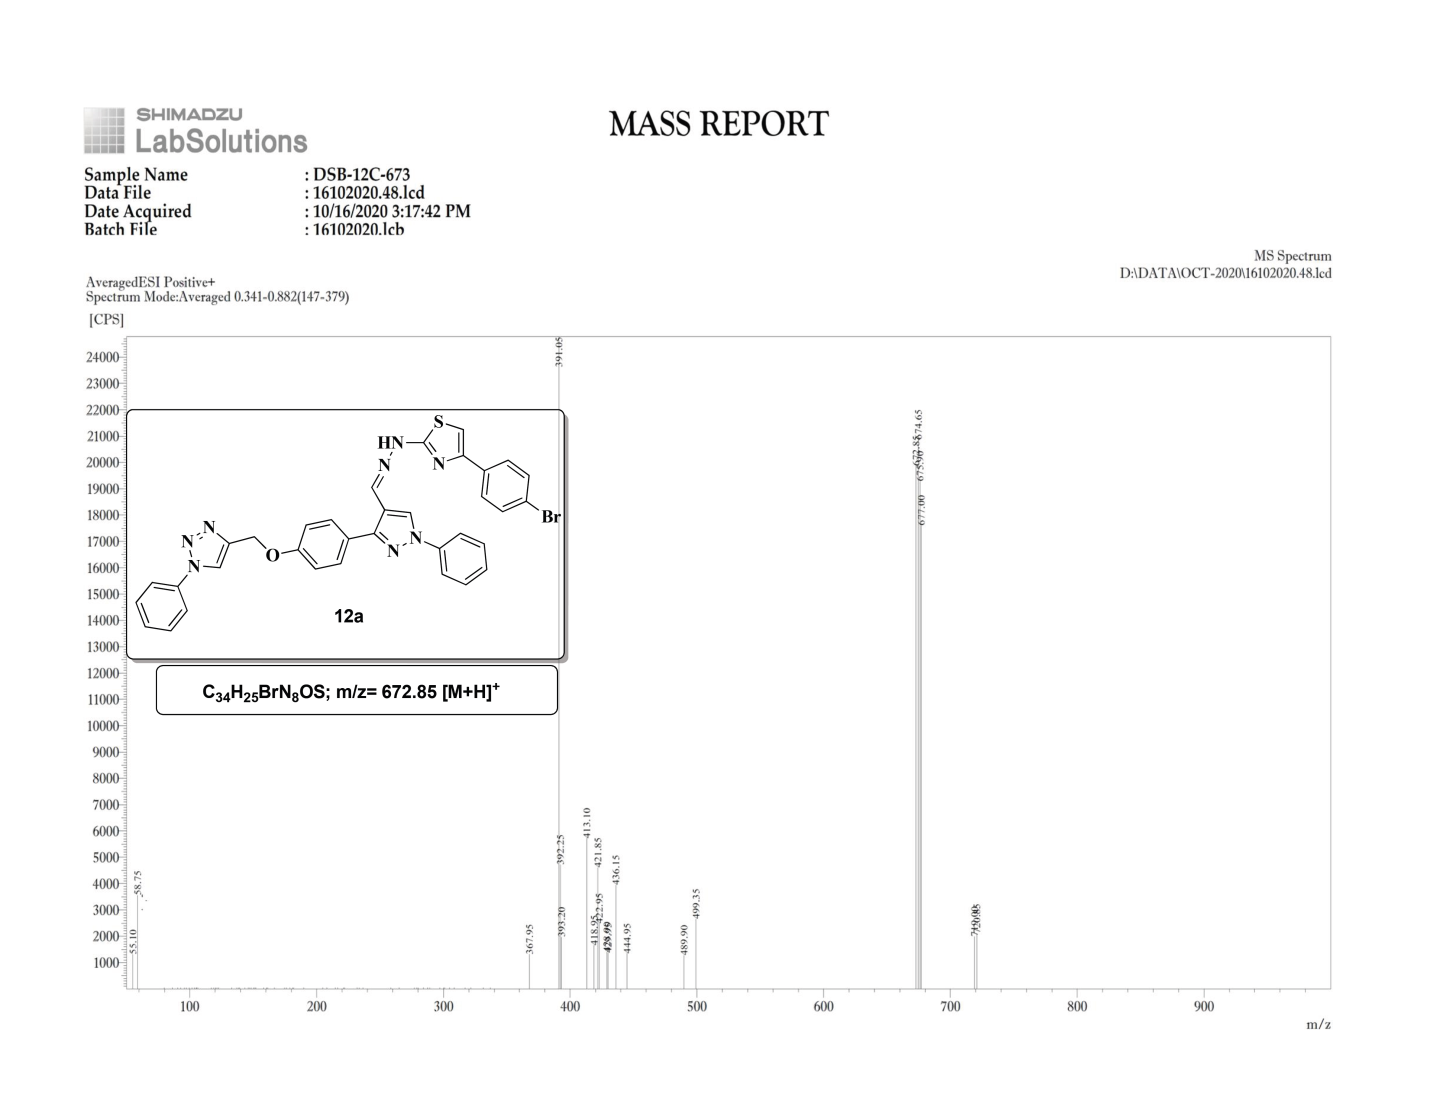


**ESI-Mass Spectrum of compound 12a**


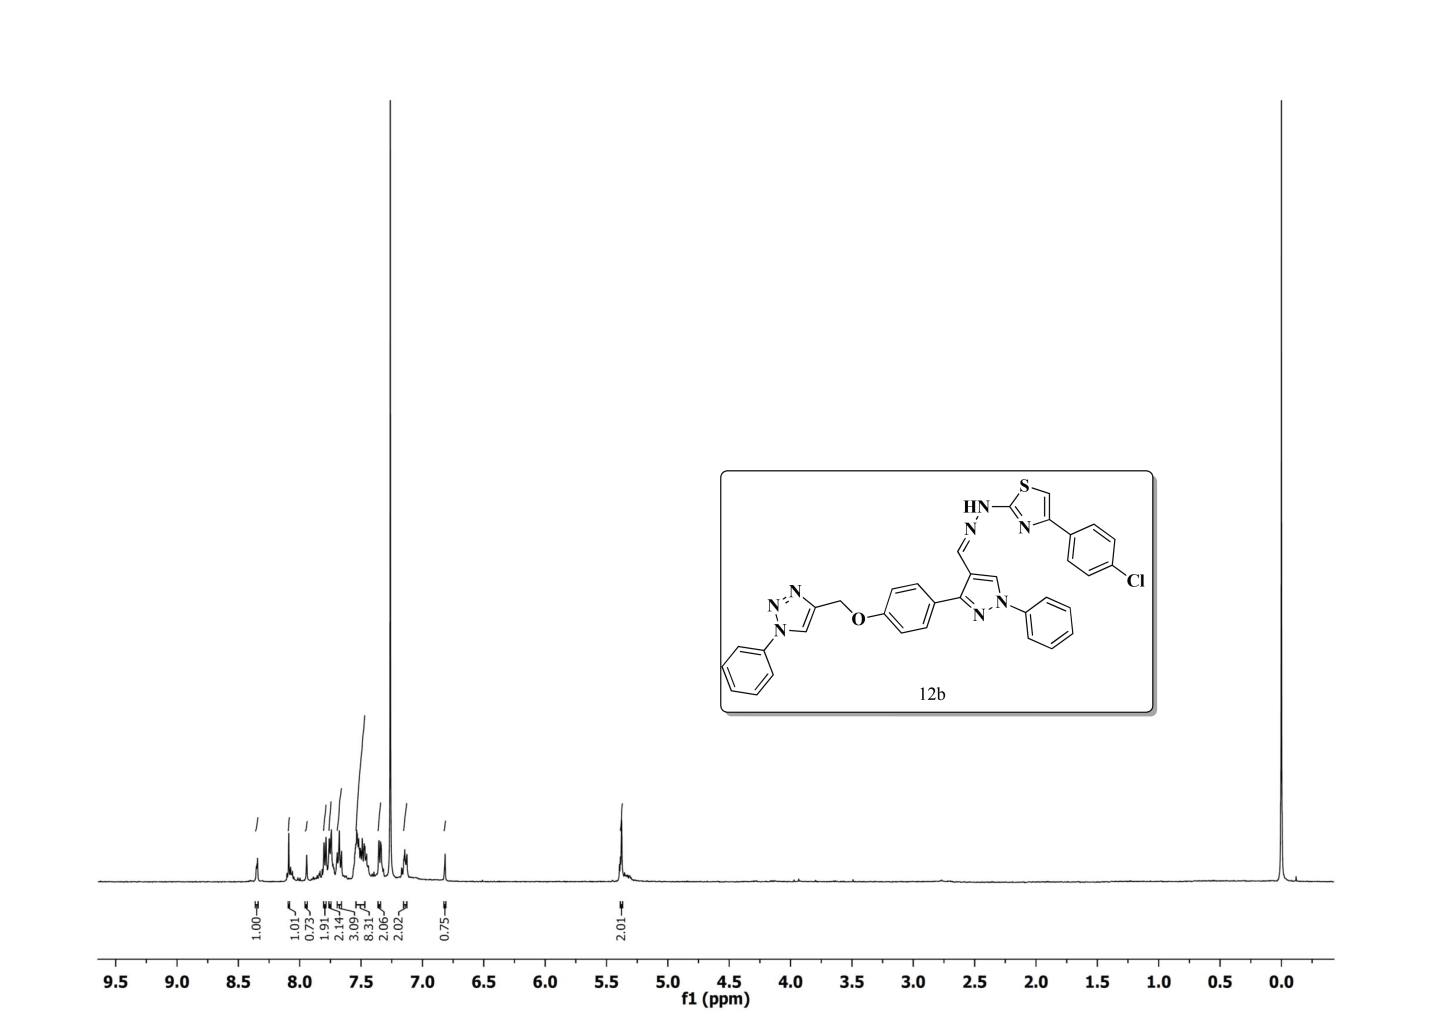


**1H NMR Spectrum of compound 12b (400 MHz, CDCl3)**


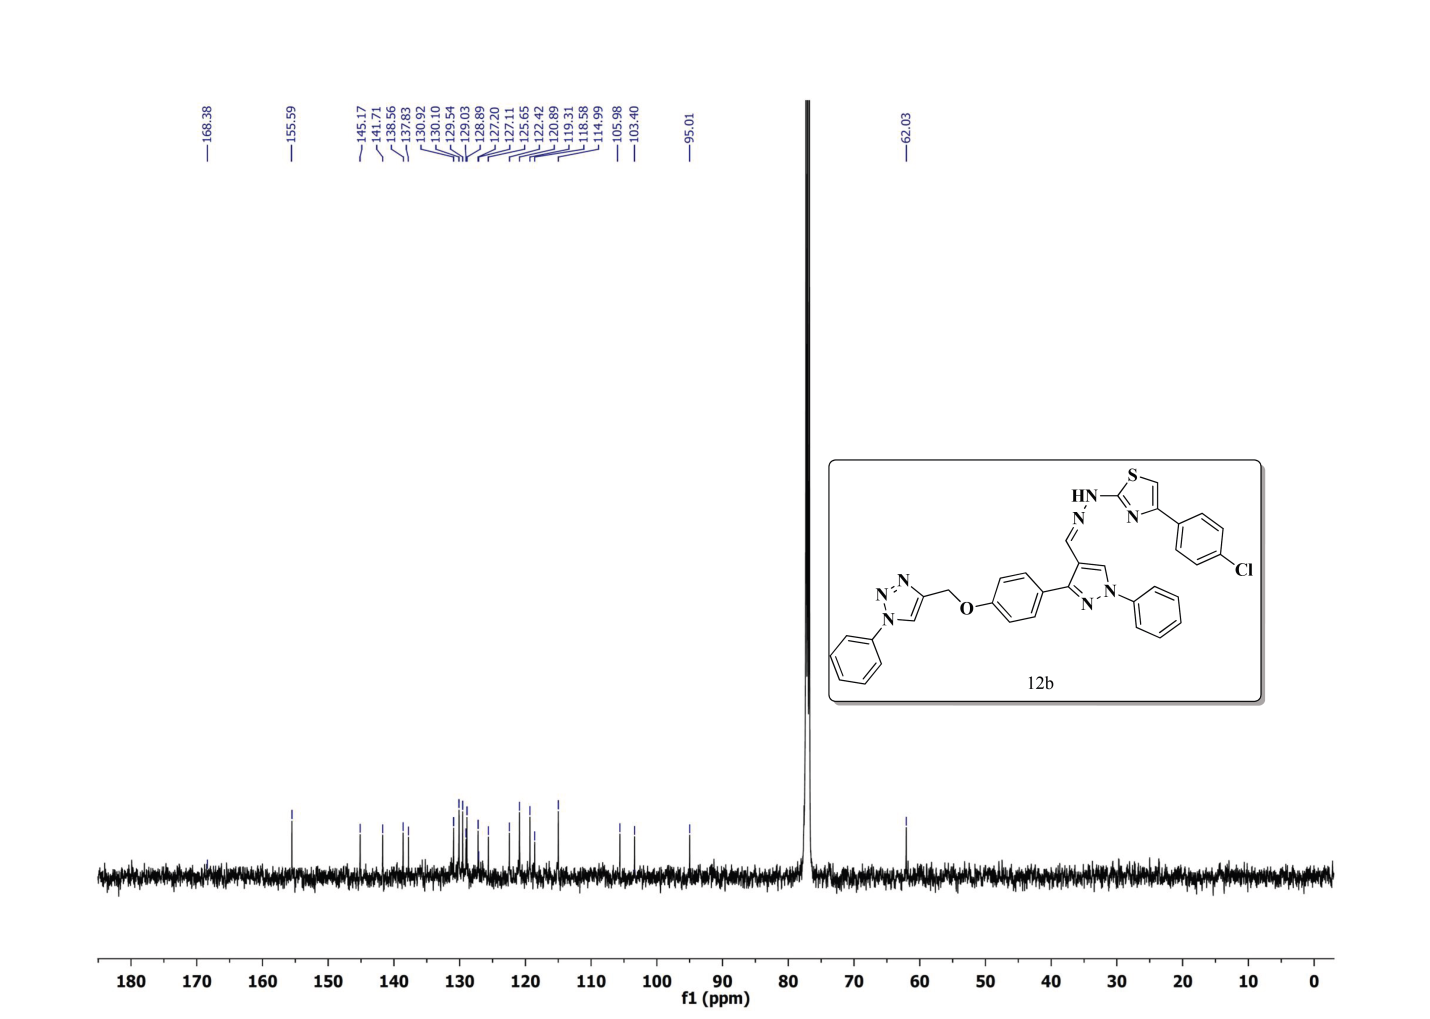
**13C NMR Spectrum of compound 12b (100 MHz, CDCl3)**


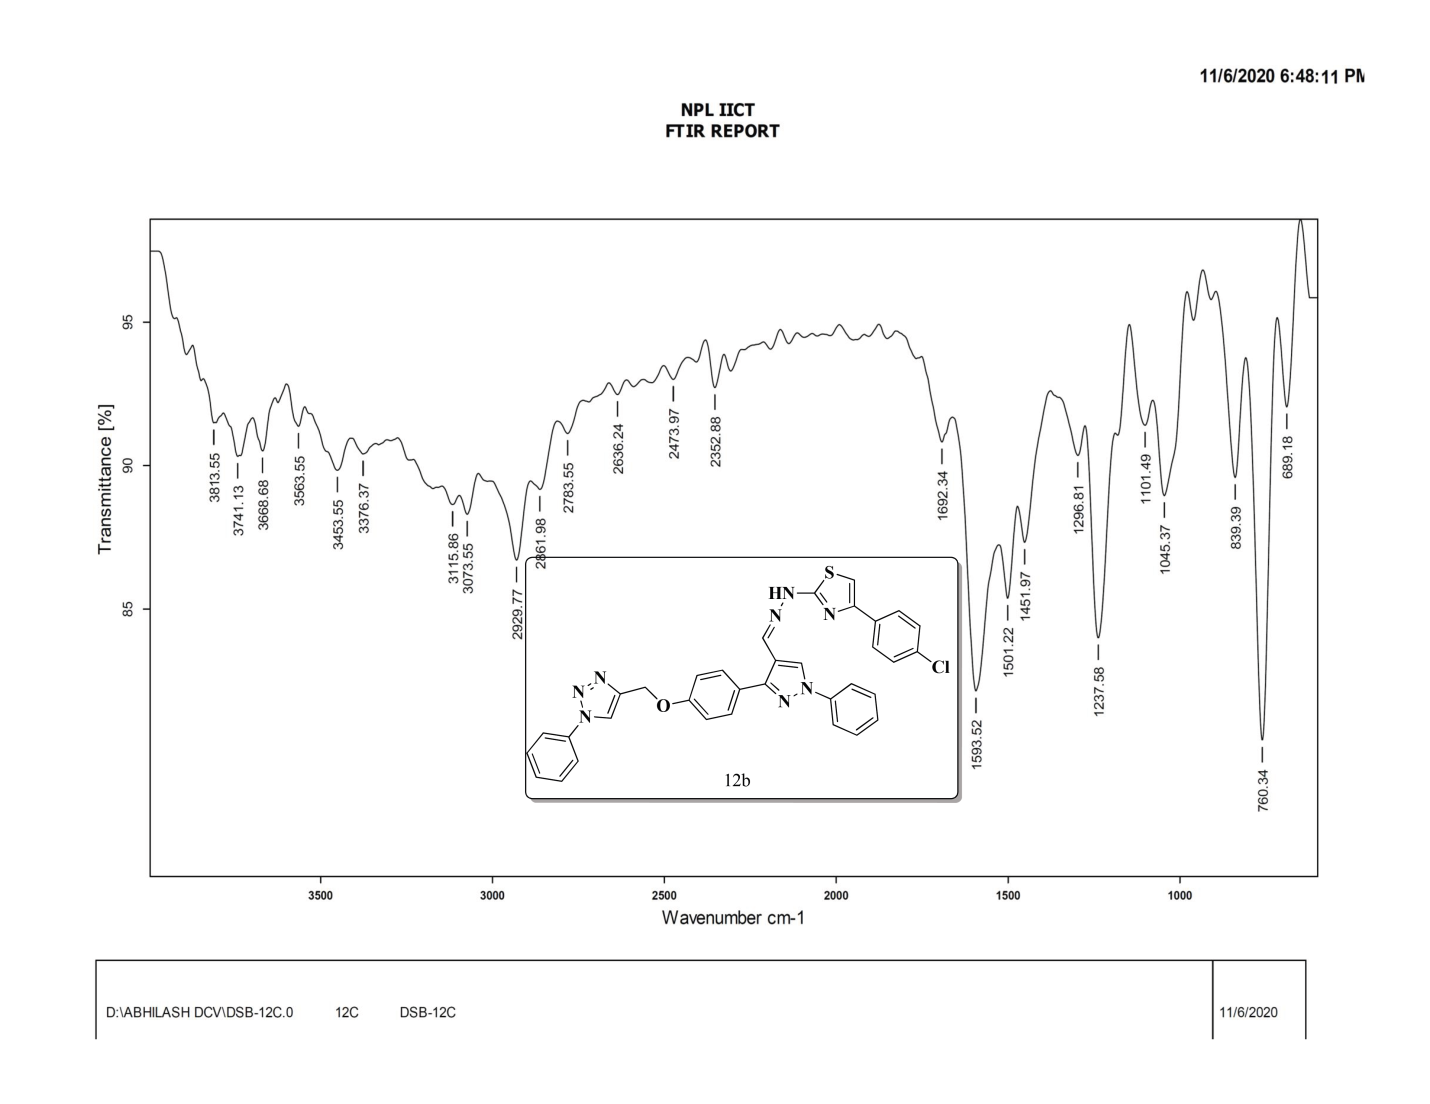
**FT-IR Spectrum of compound 12b**


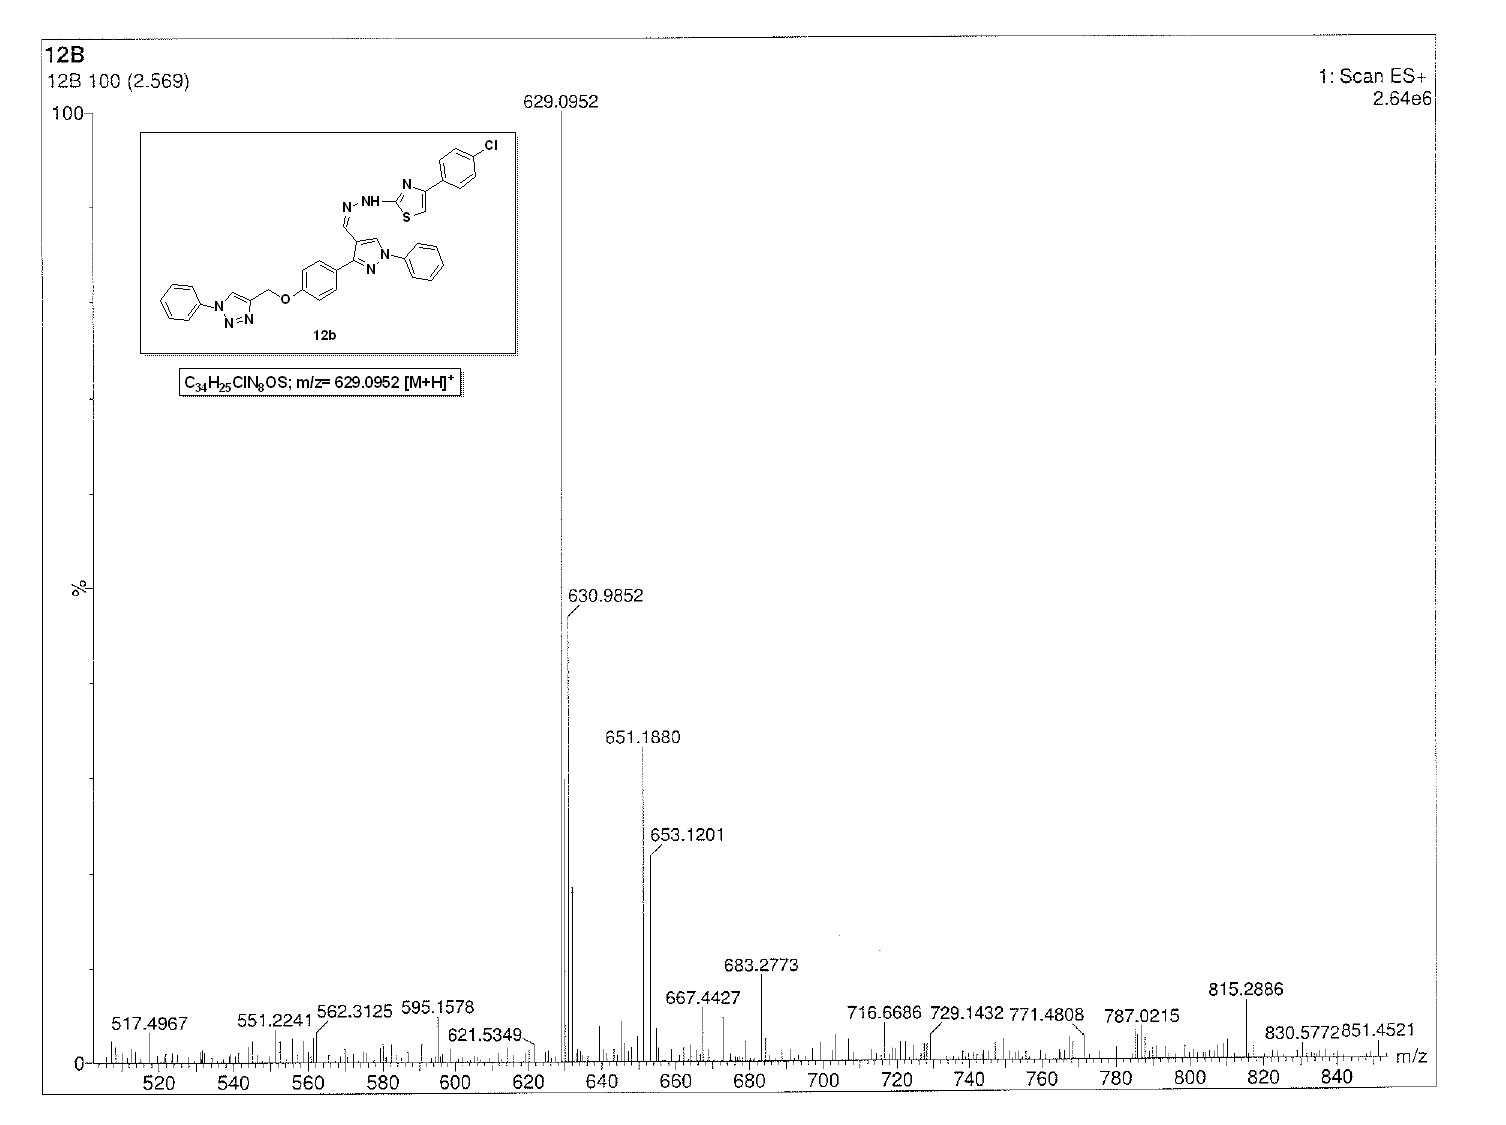


**ESI-Mass Spectrum of compound 10b**


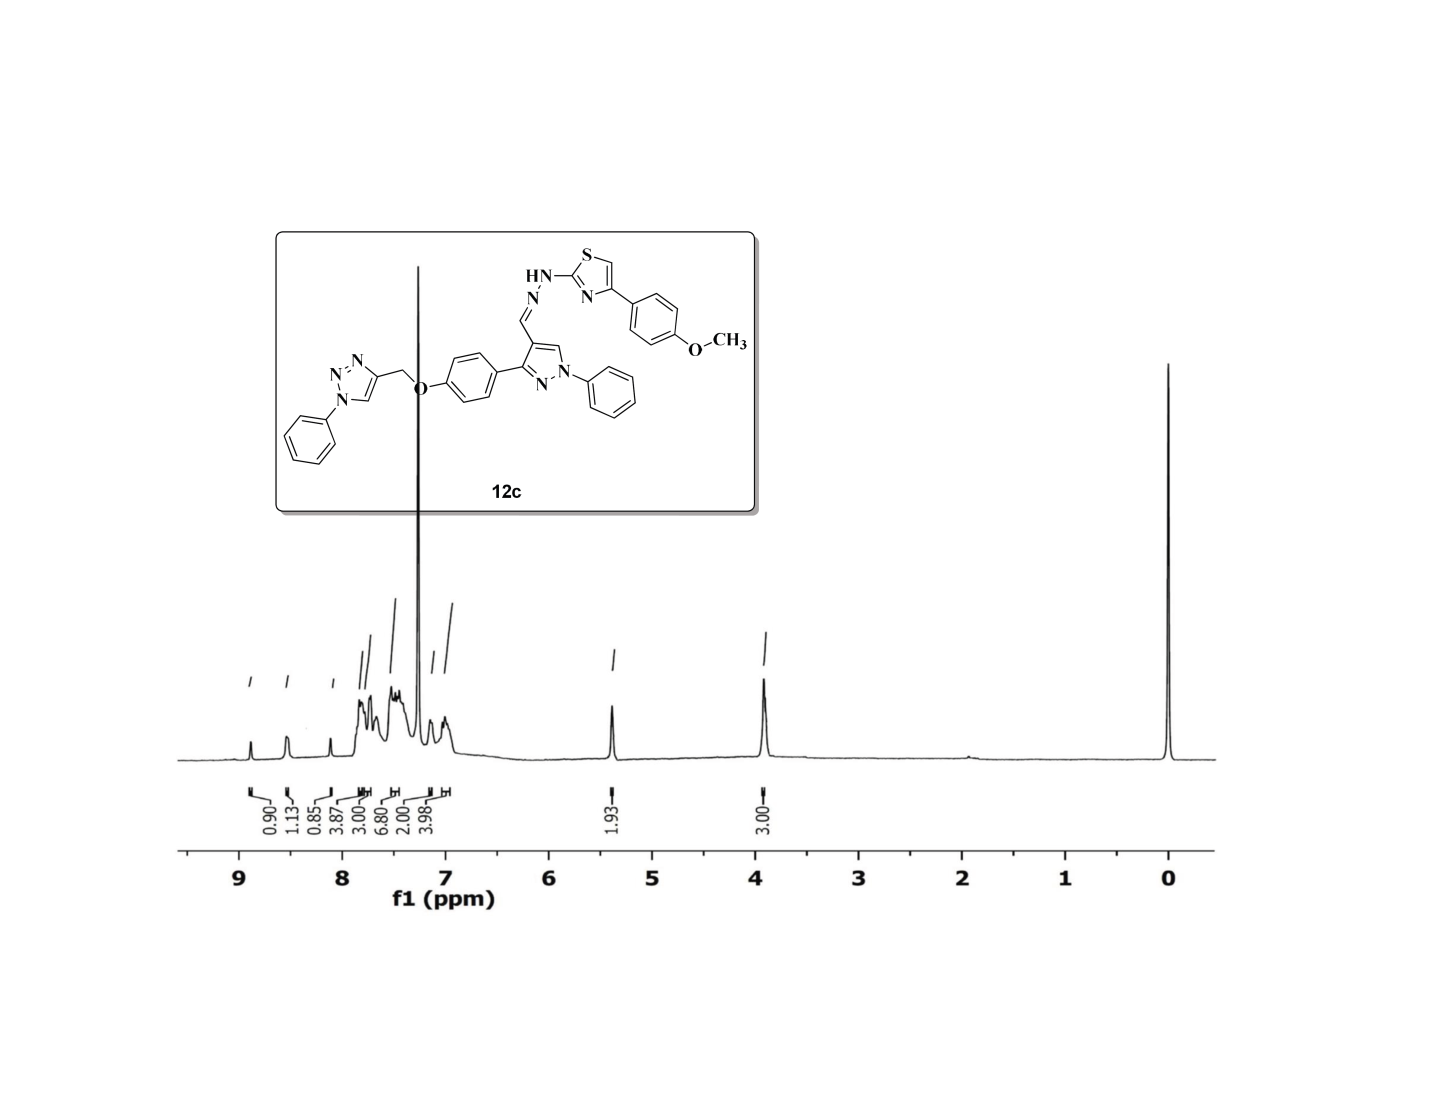
**1H NMR Spectrum of compound 12c (400 MHz, CDCl3)**


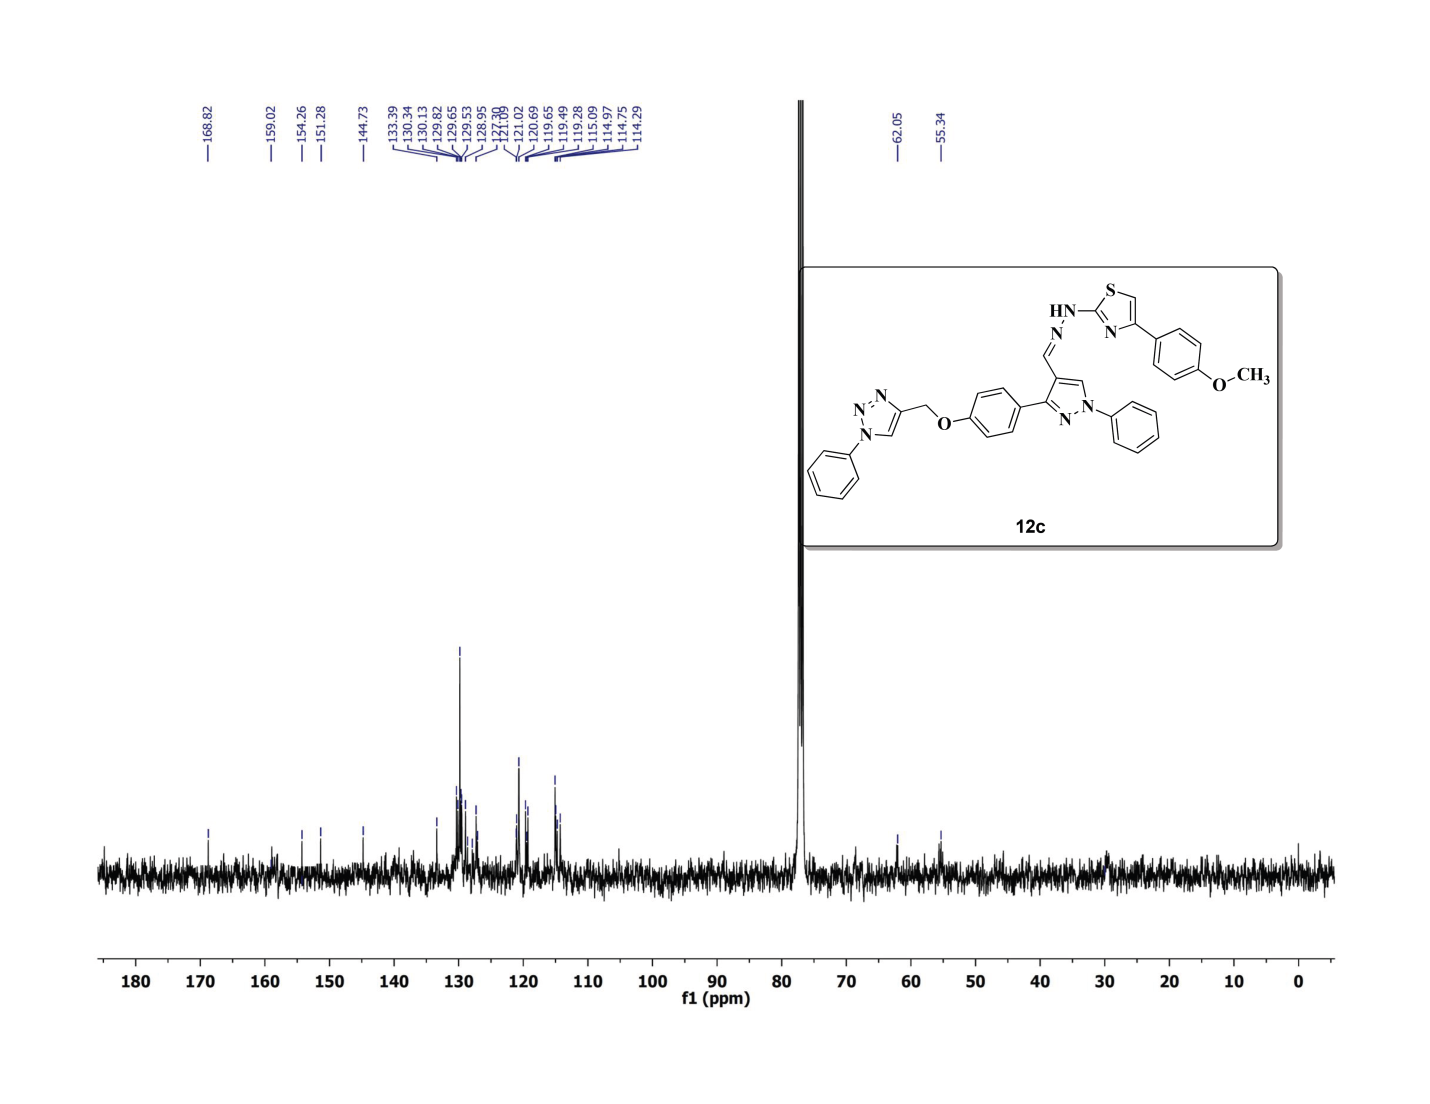
**13C NMRSpectrum of compound 12c (100 MHz, CDCl3)**


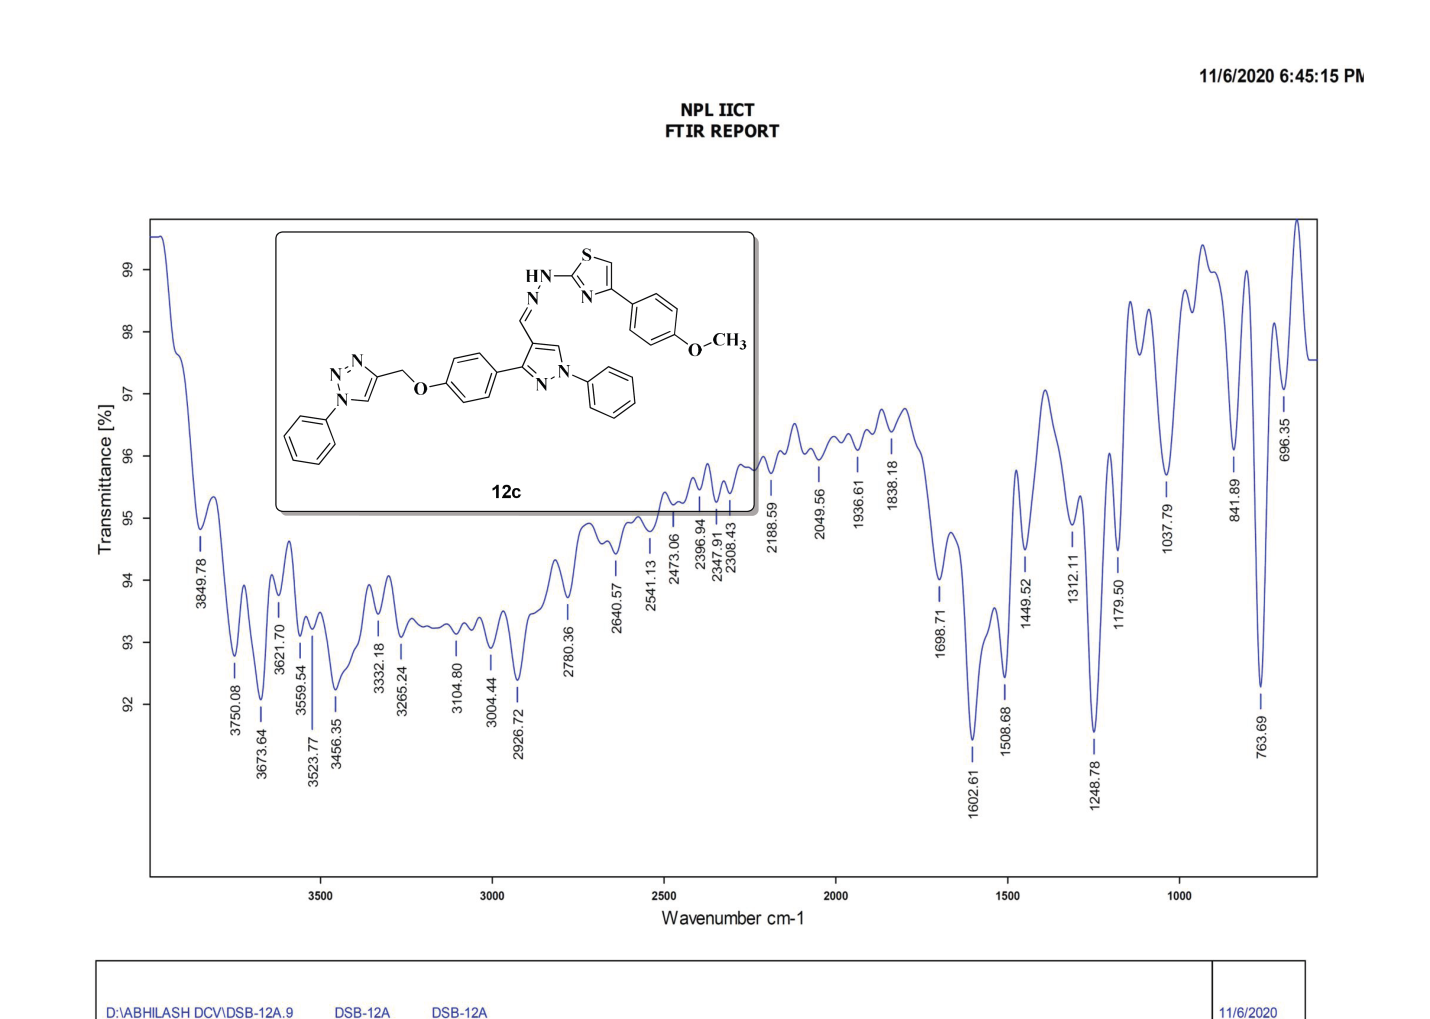


**FT-IR Spectrum of compound 12c**


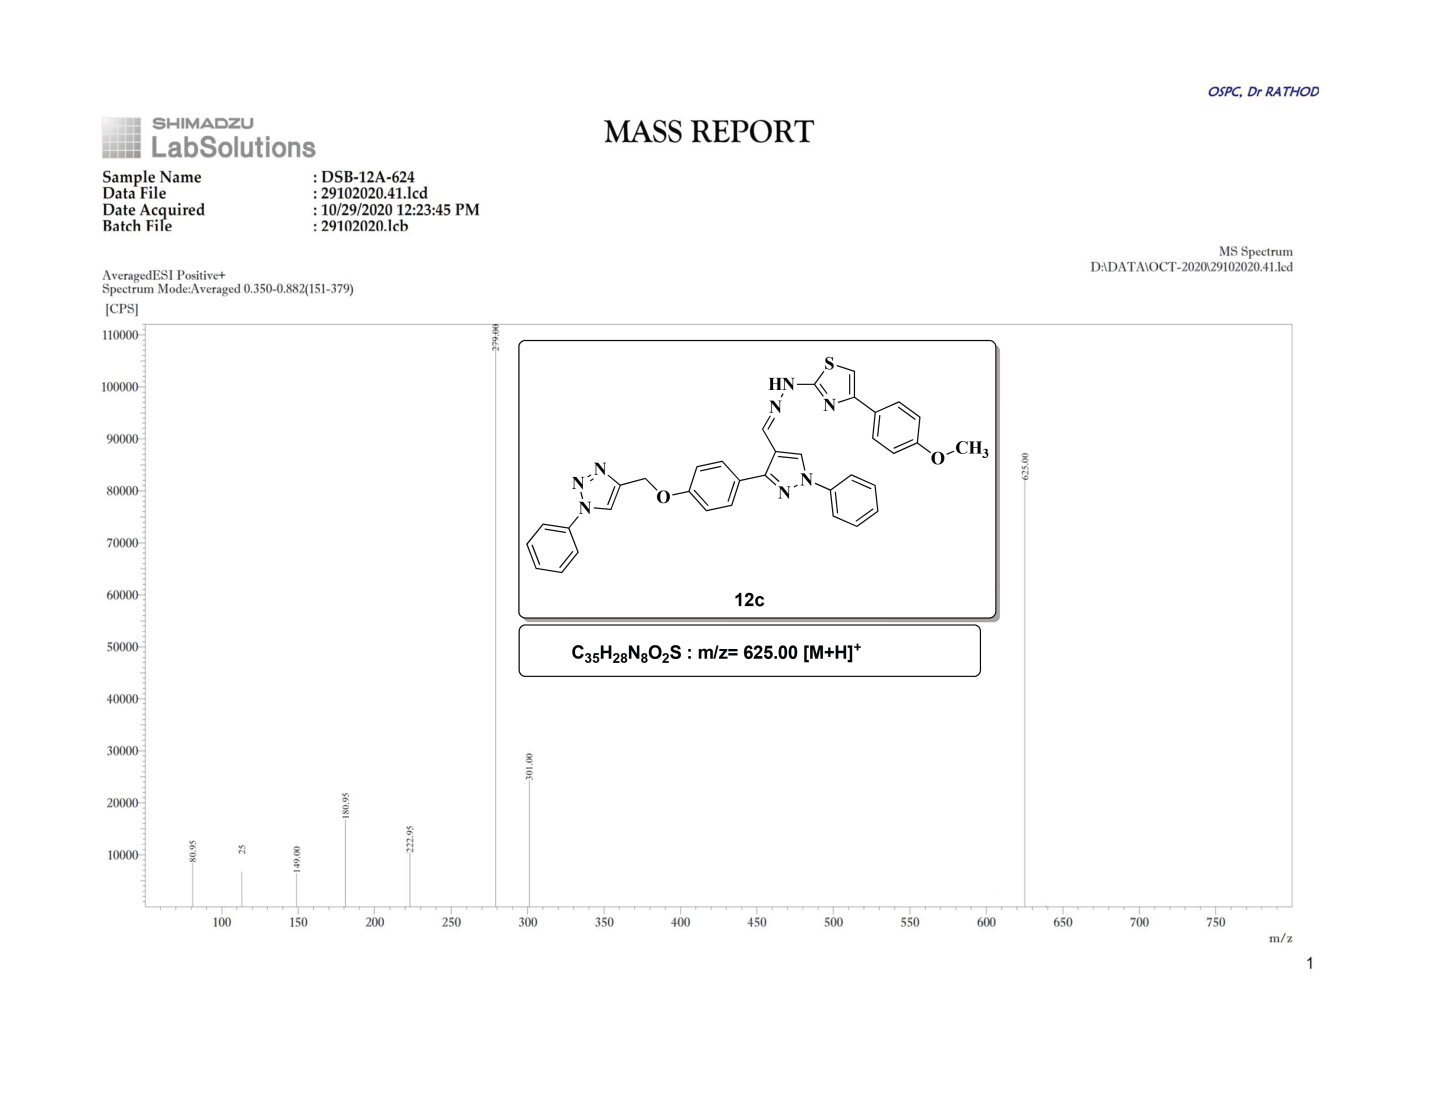
**ESI-Mass Spectrum of compound 12c**


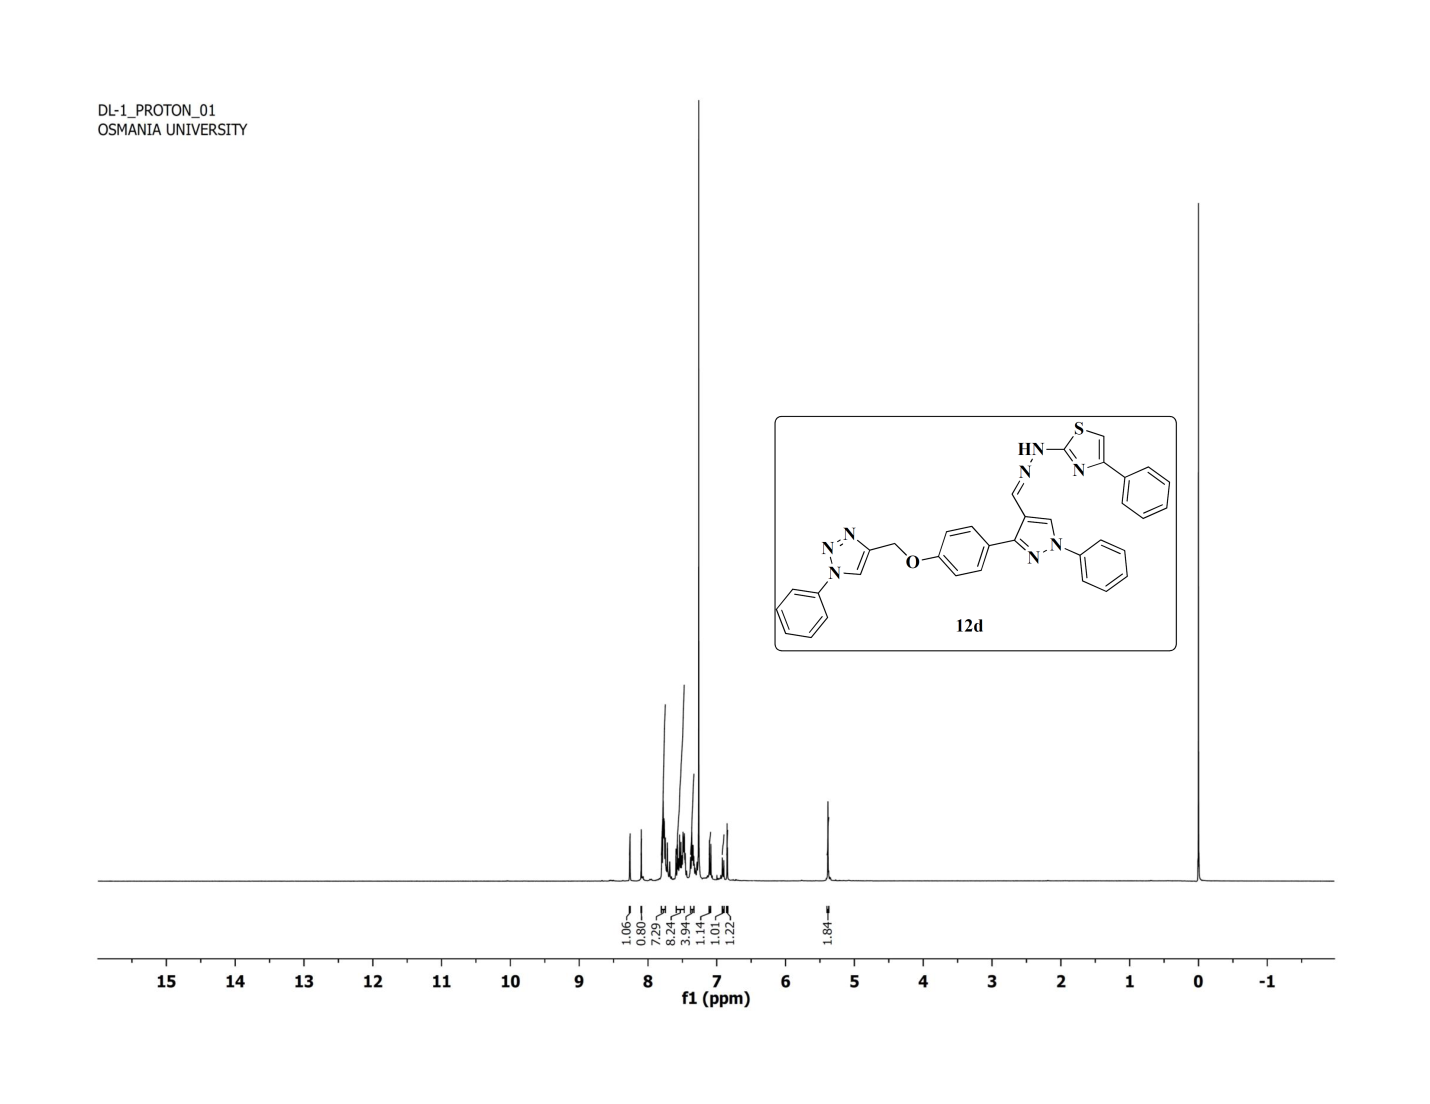
**1H NMR Spectrum of compound 12d (400 MHz, CDCl3)**


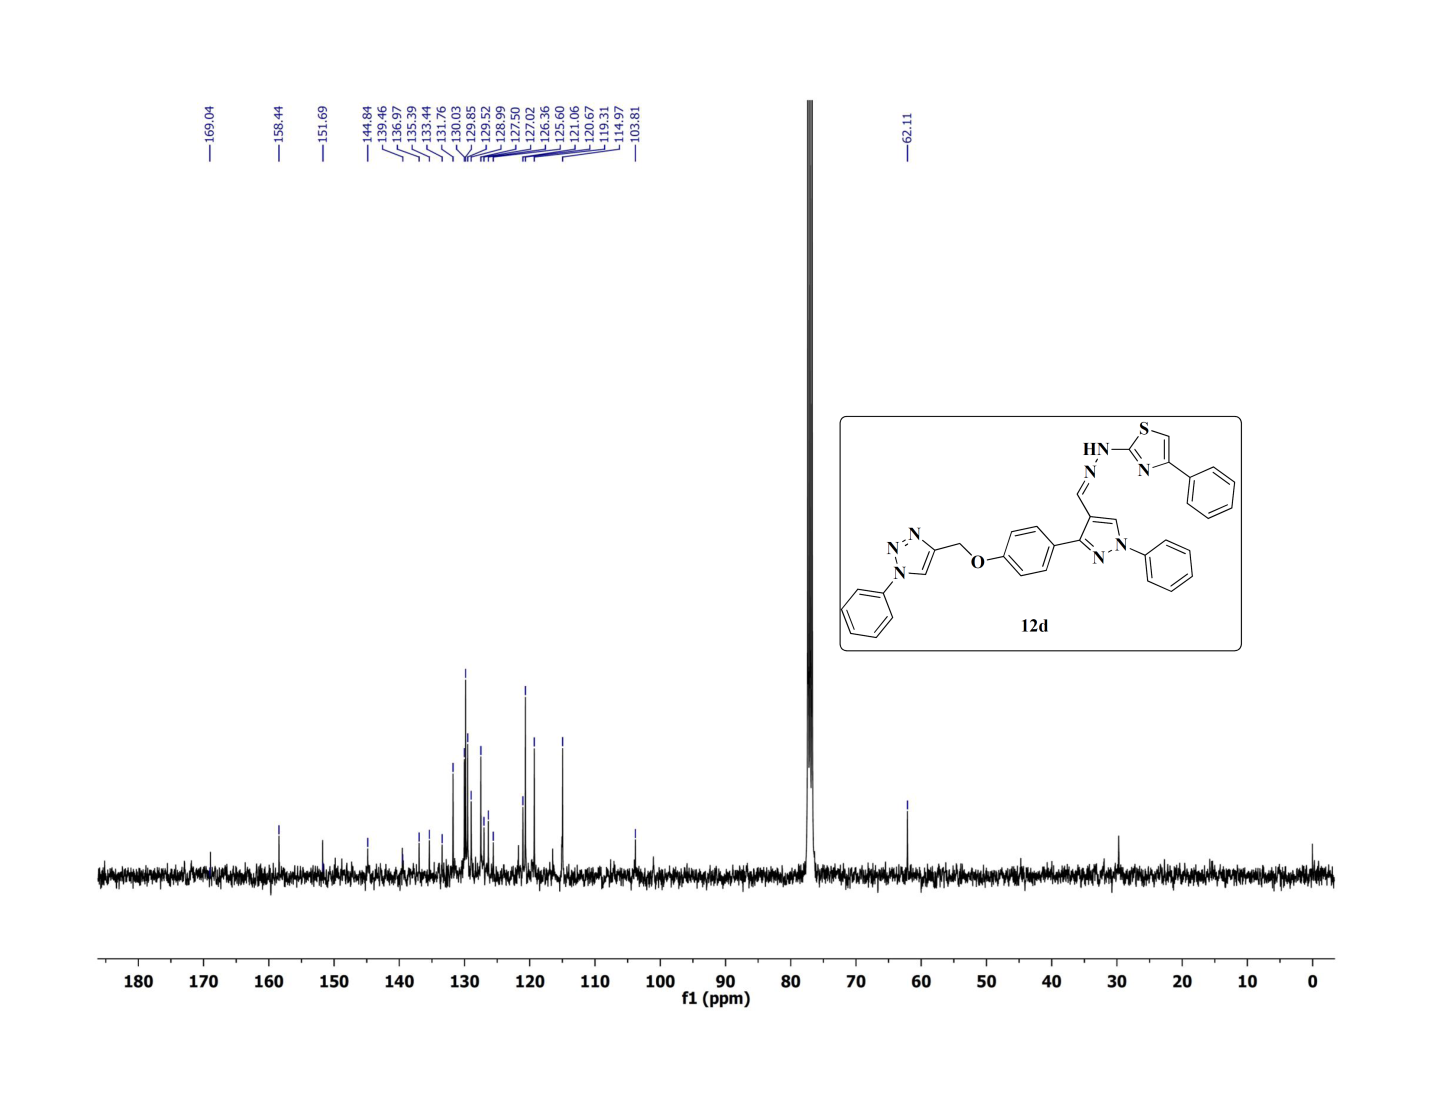
**13C NMR Spectrum of compound 12d (100 MHz, CDCl3)**


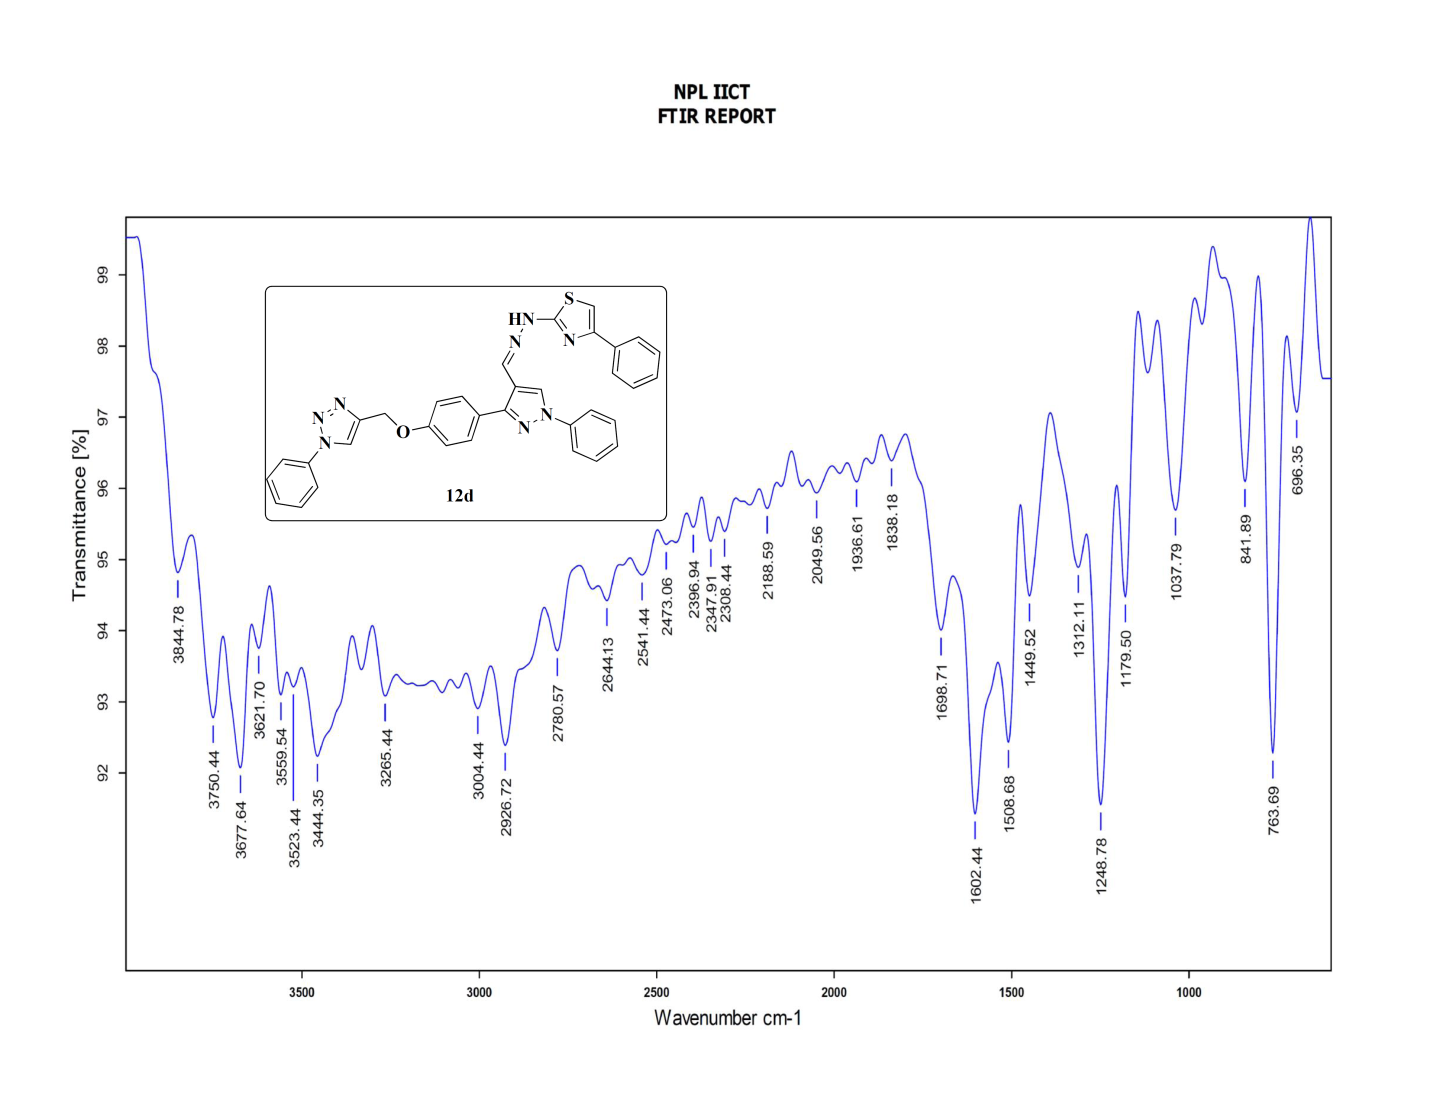


**FT-IR Spectrum of compound 10d**


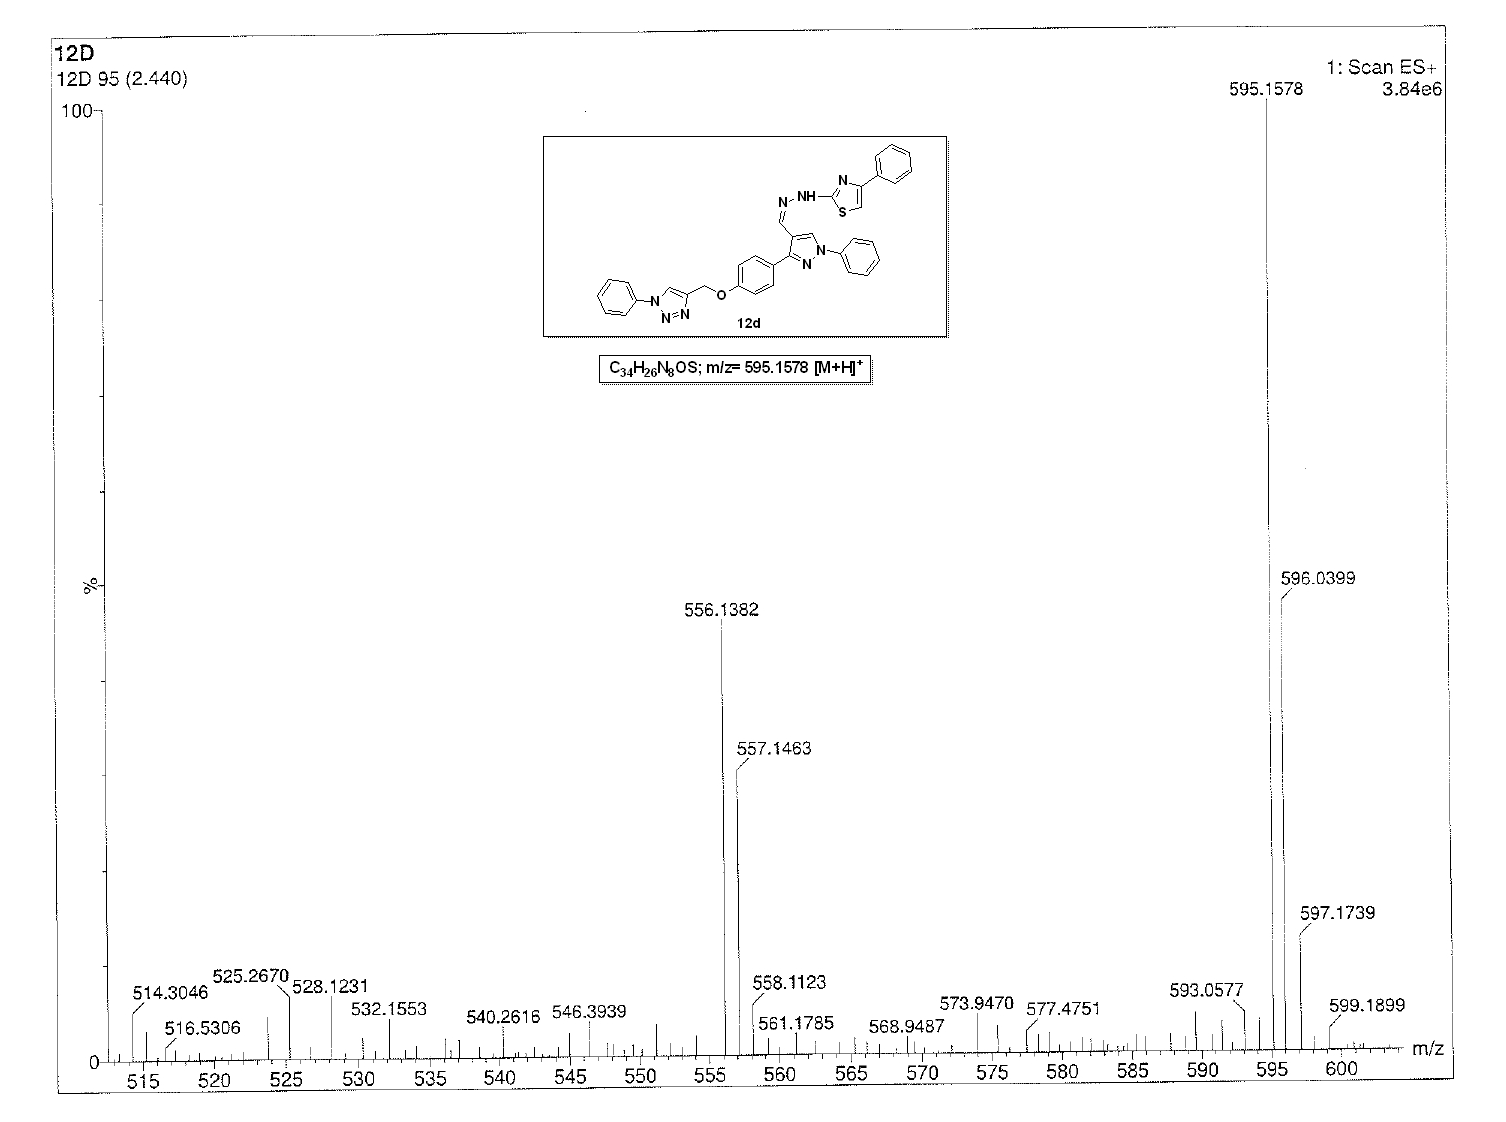
**ESI-Mass Spectrum of compound 12d**


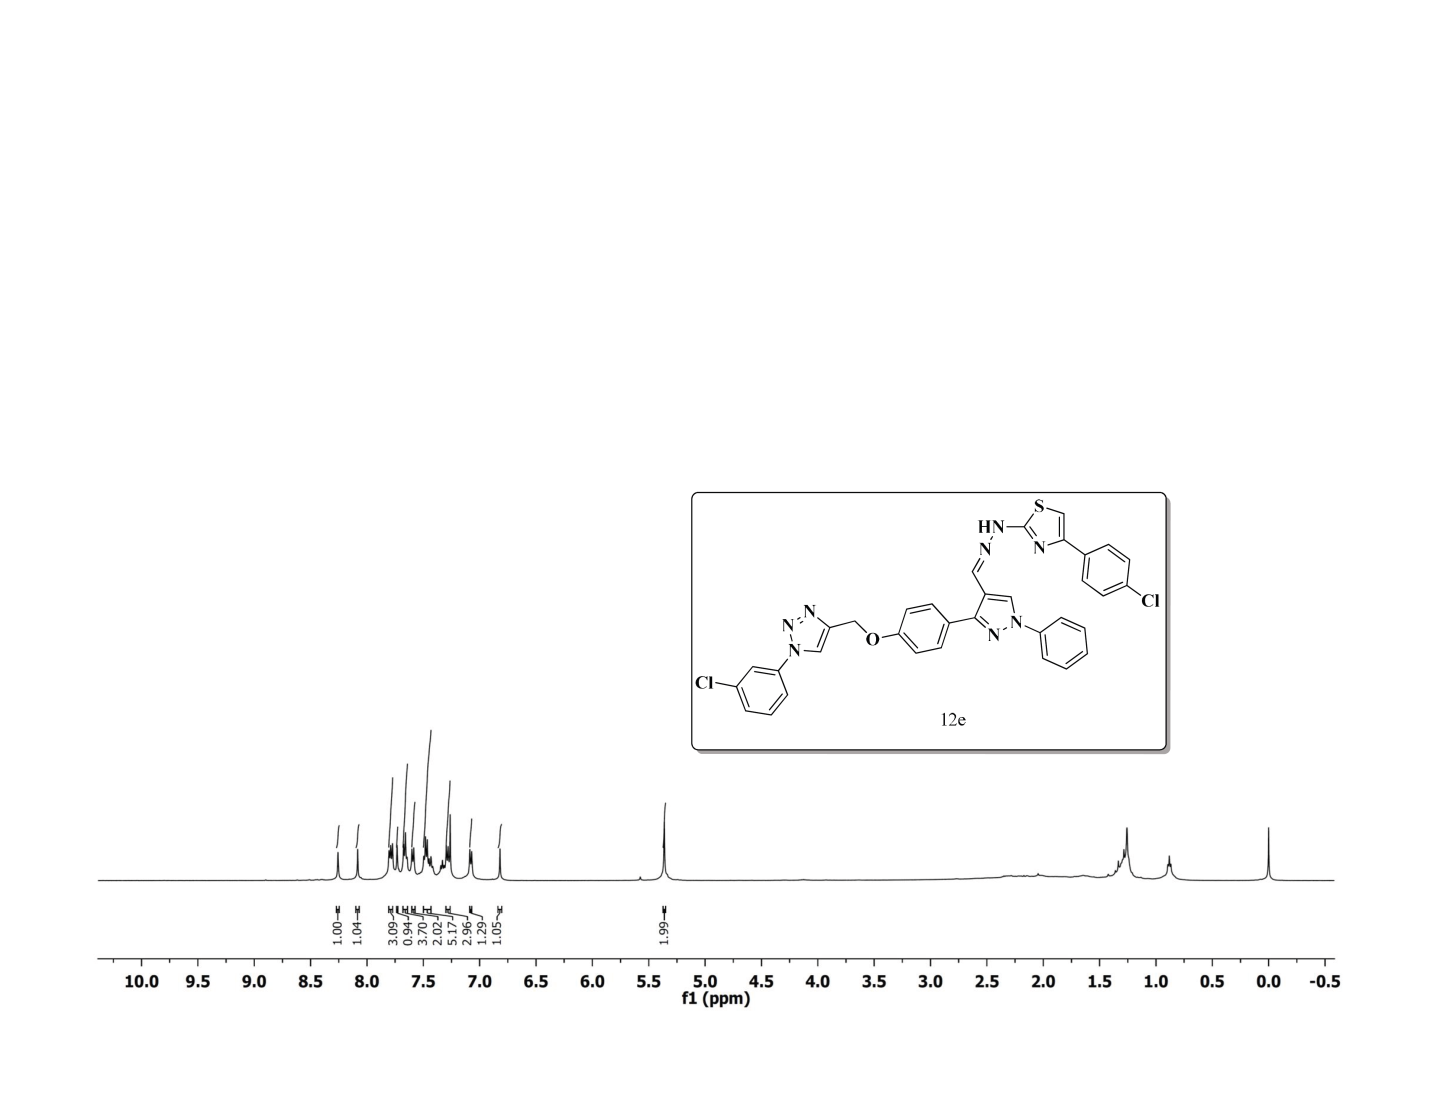
**1H NMR Spectrum of compound 12e (400 MHz, CDCl3)**


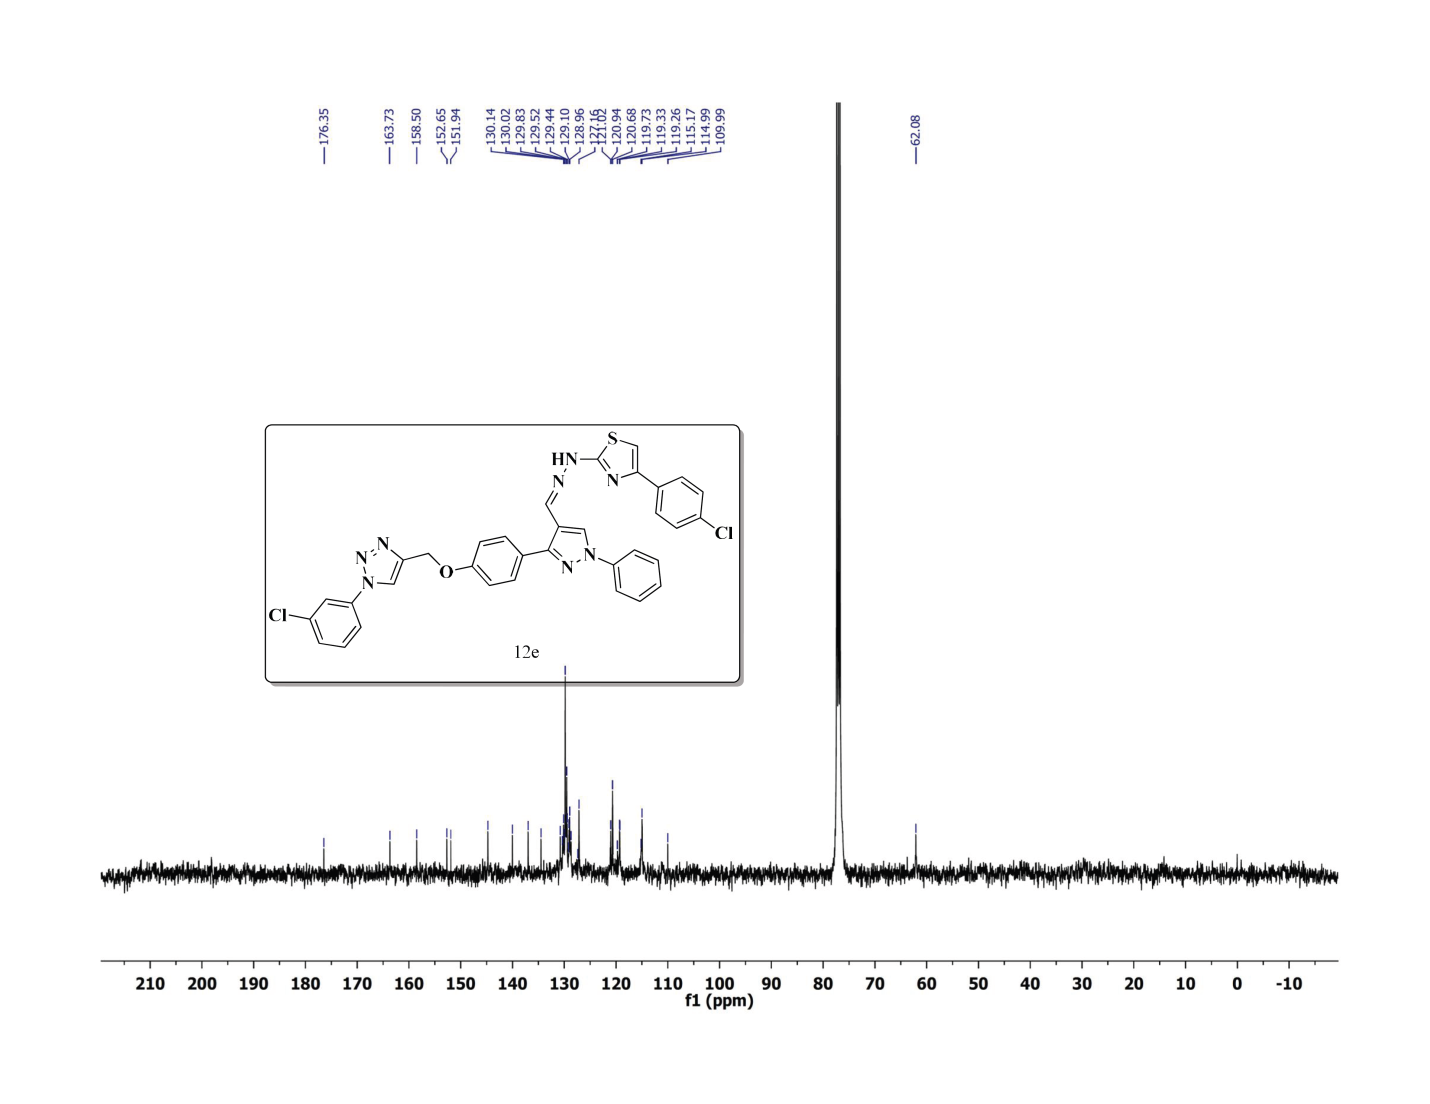


**13C NMR Spectrum of compound 10e (100 MHz, CDCl3)**


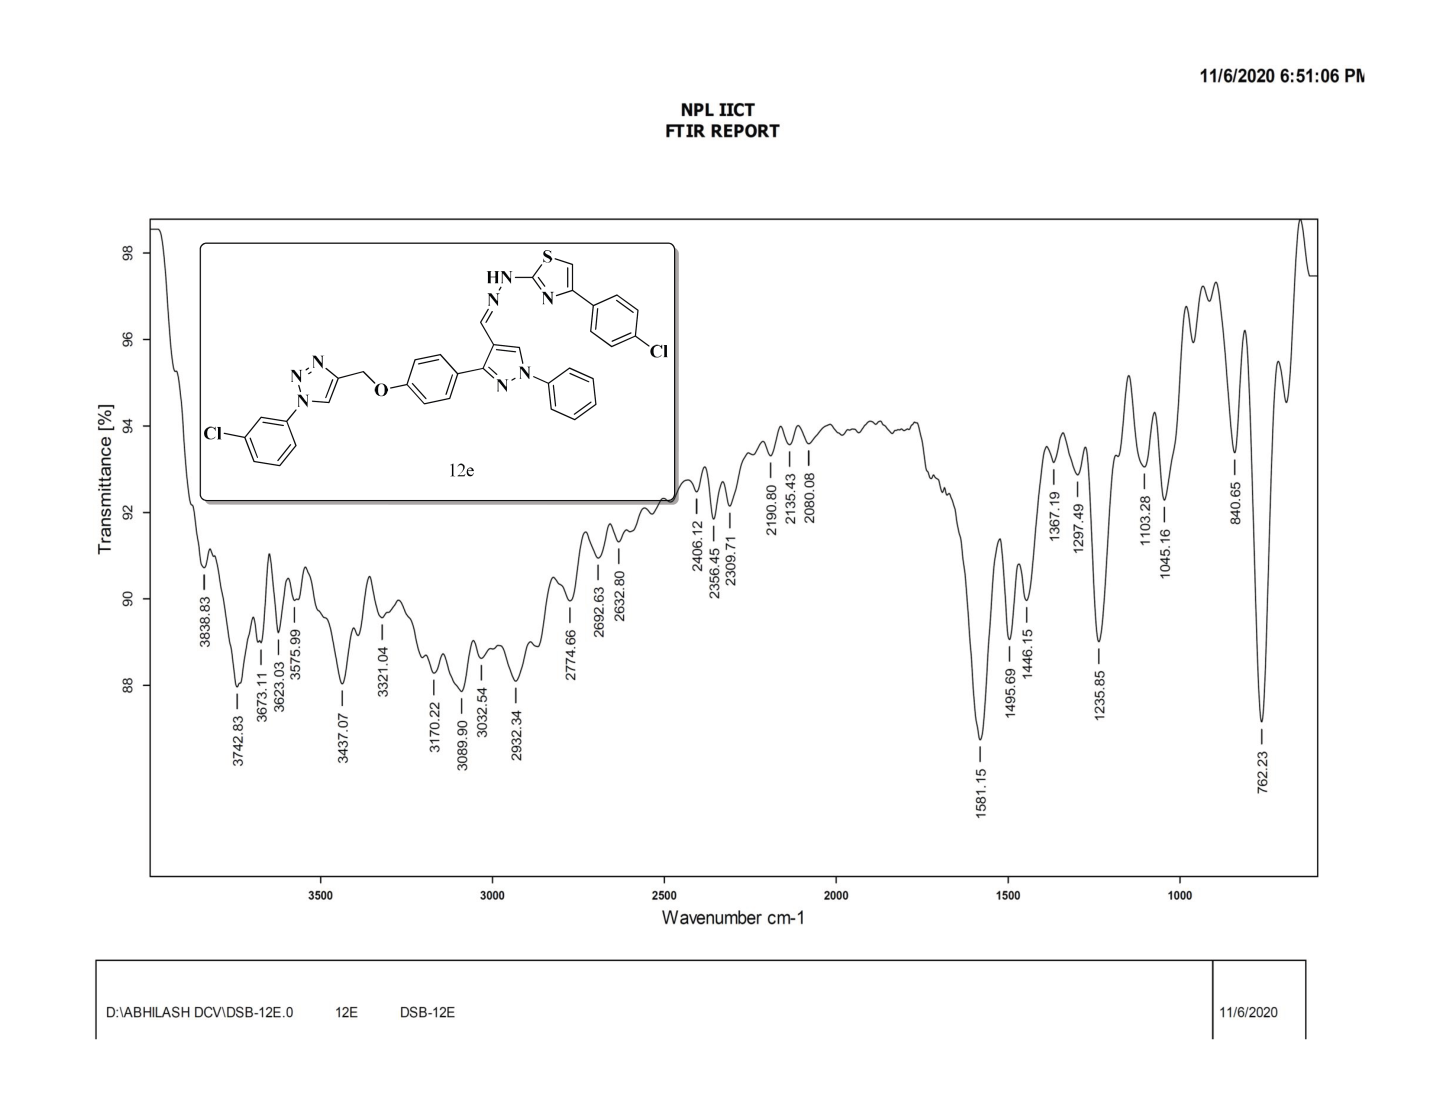


**FT-IR Spectrum of compound 10e**


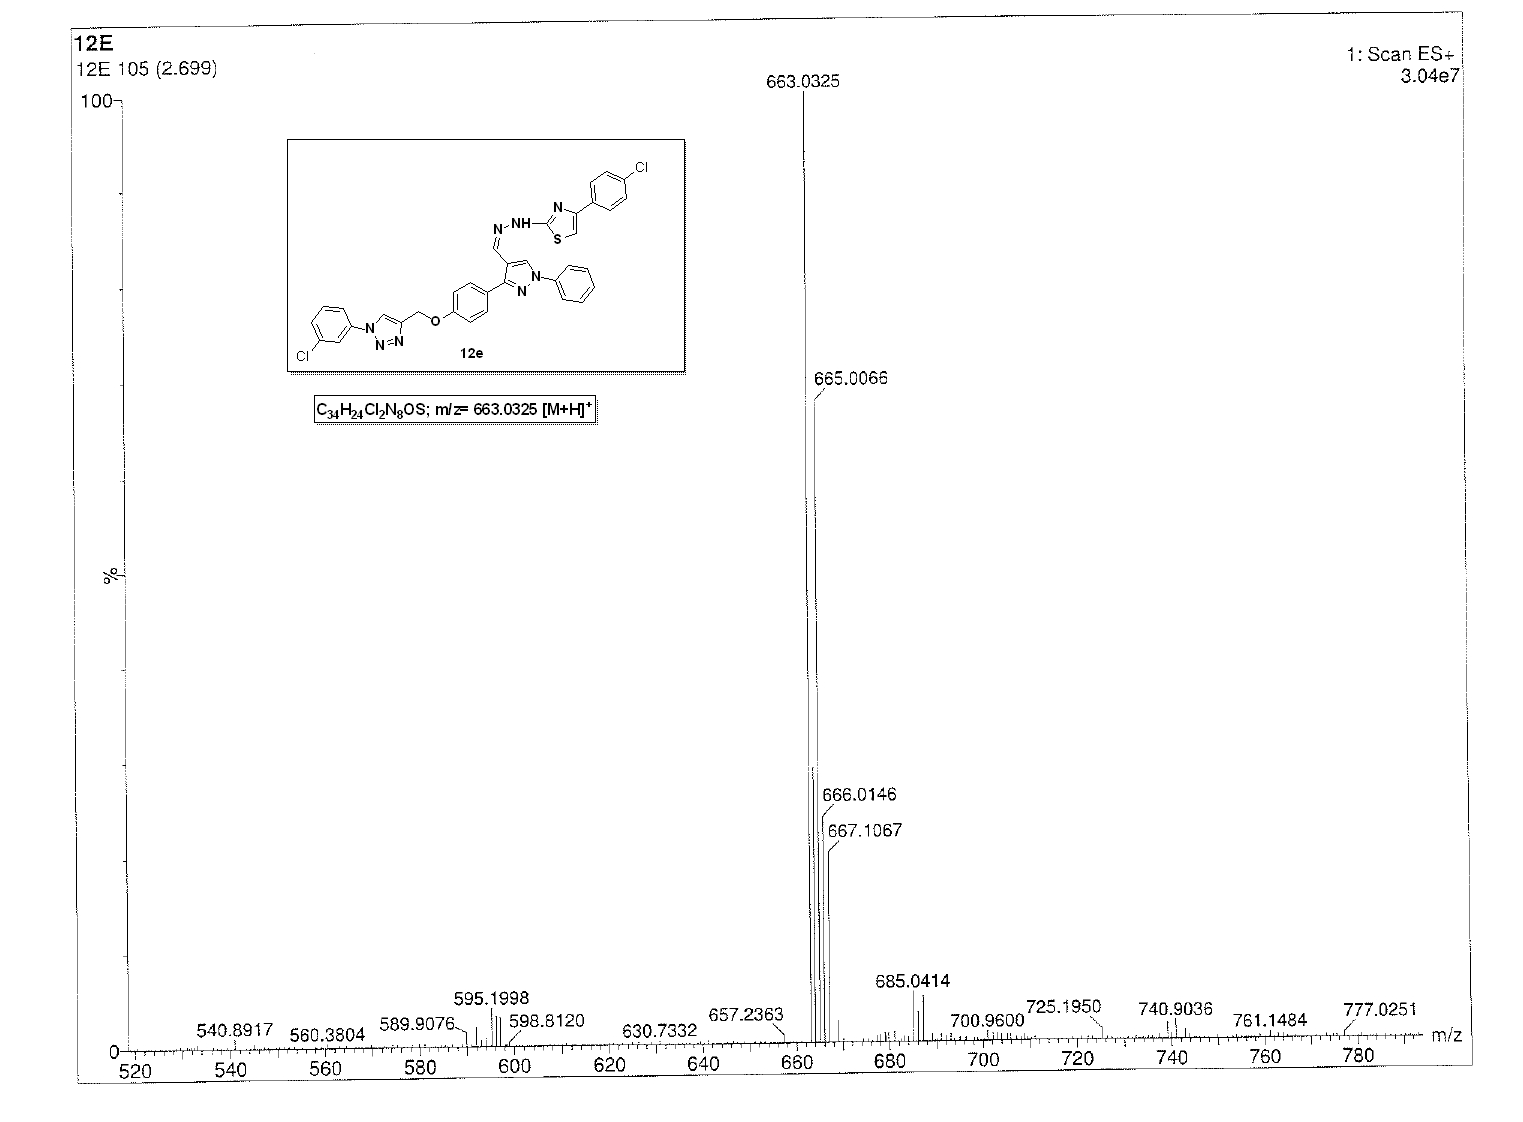
**ESI-Mass Spectrum of compound 12e**


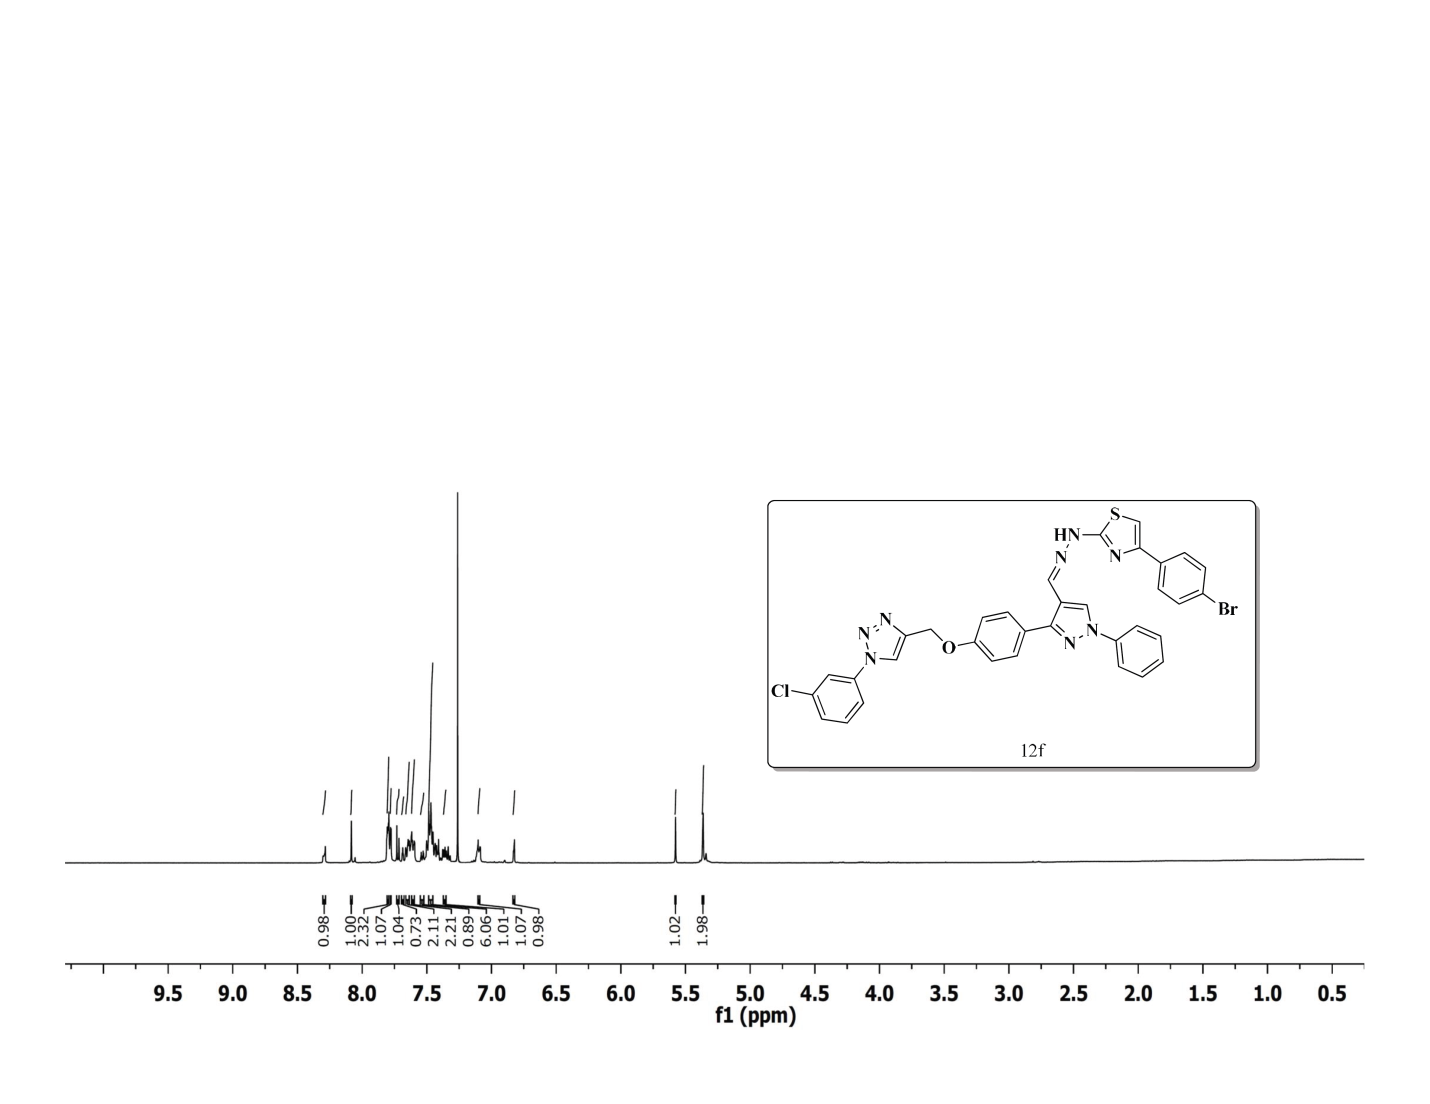


**1H NMR Spectrum of compound 12f (400 MHz, CDCl3)**


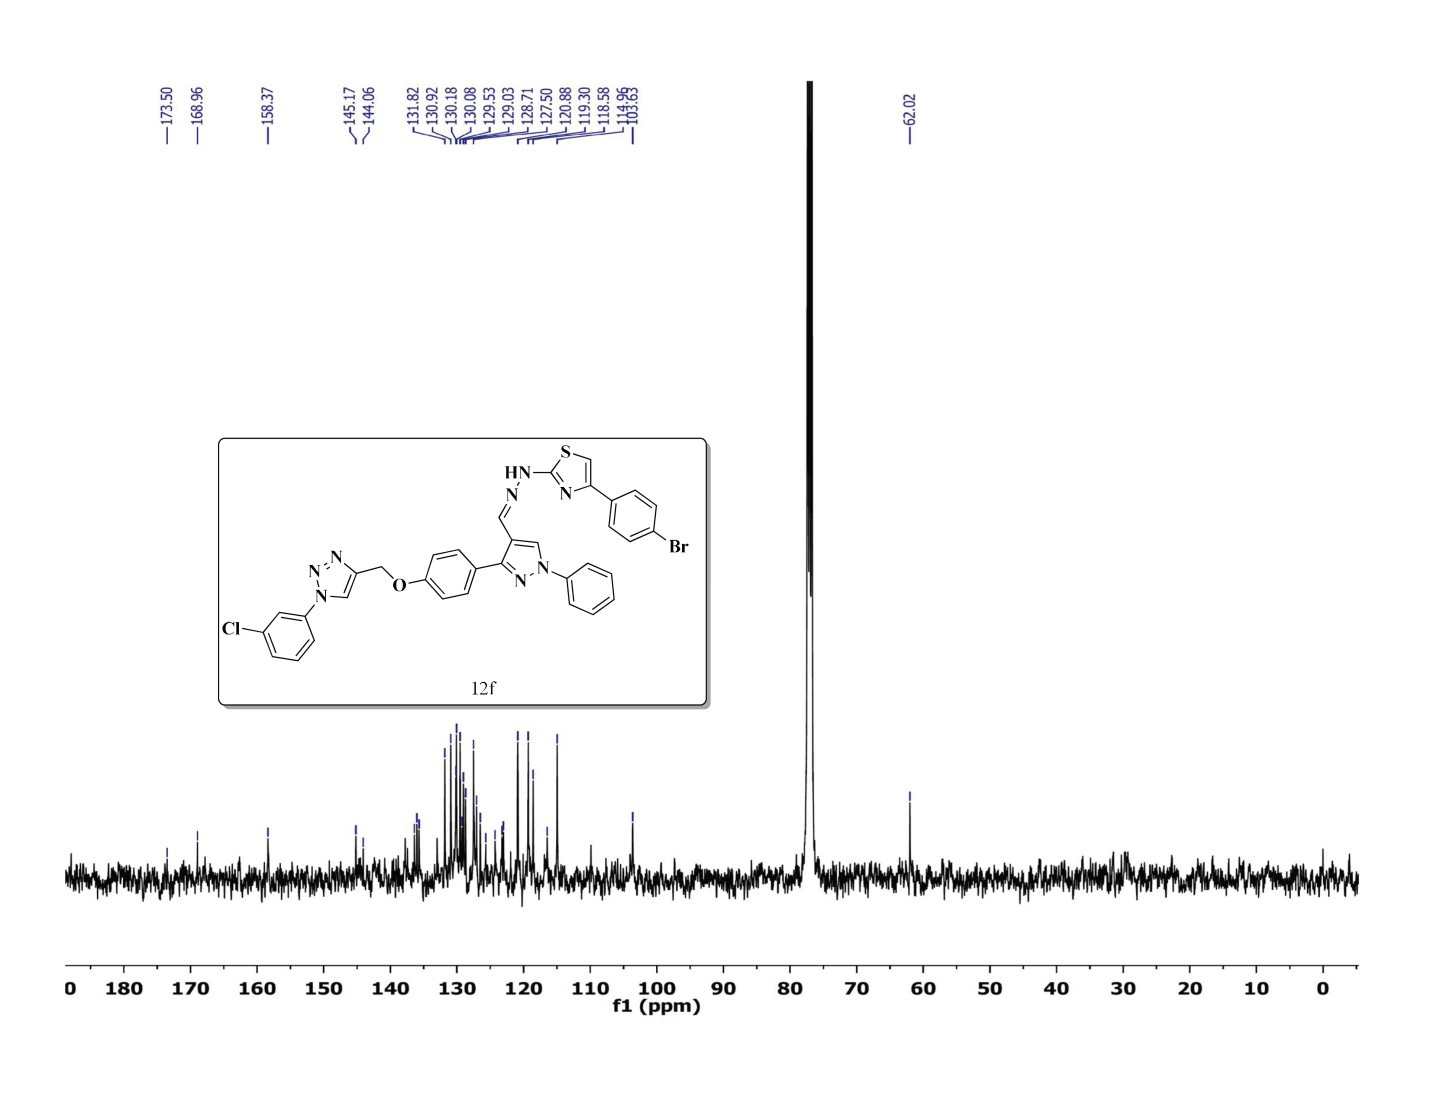
**13C NMR Spectrum of compound 12f (100 MHz, CDCl3)**


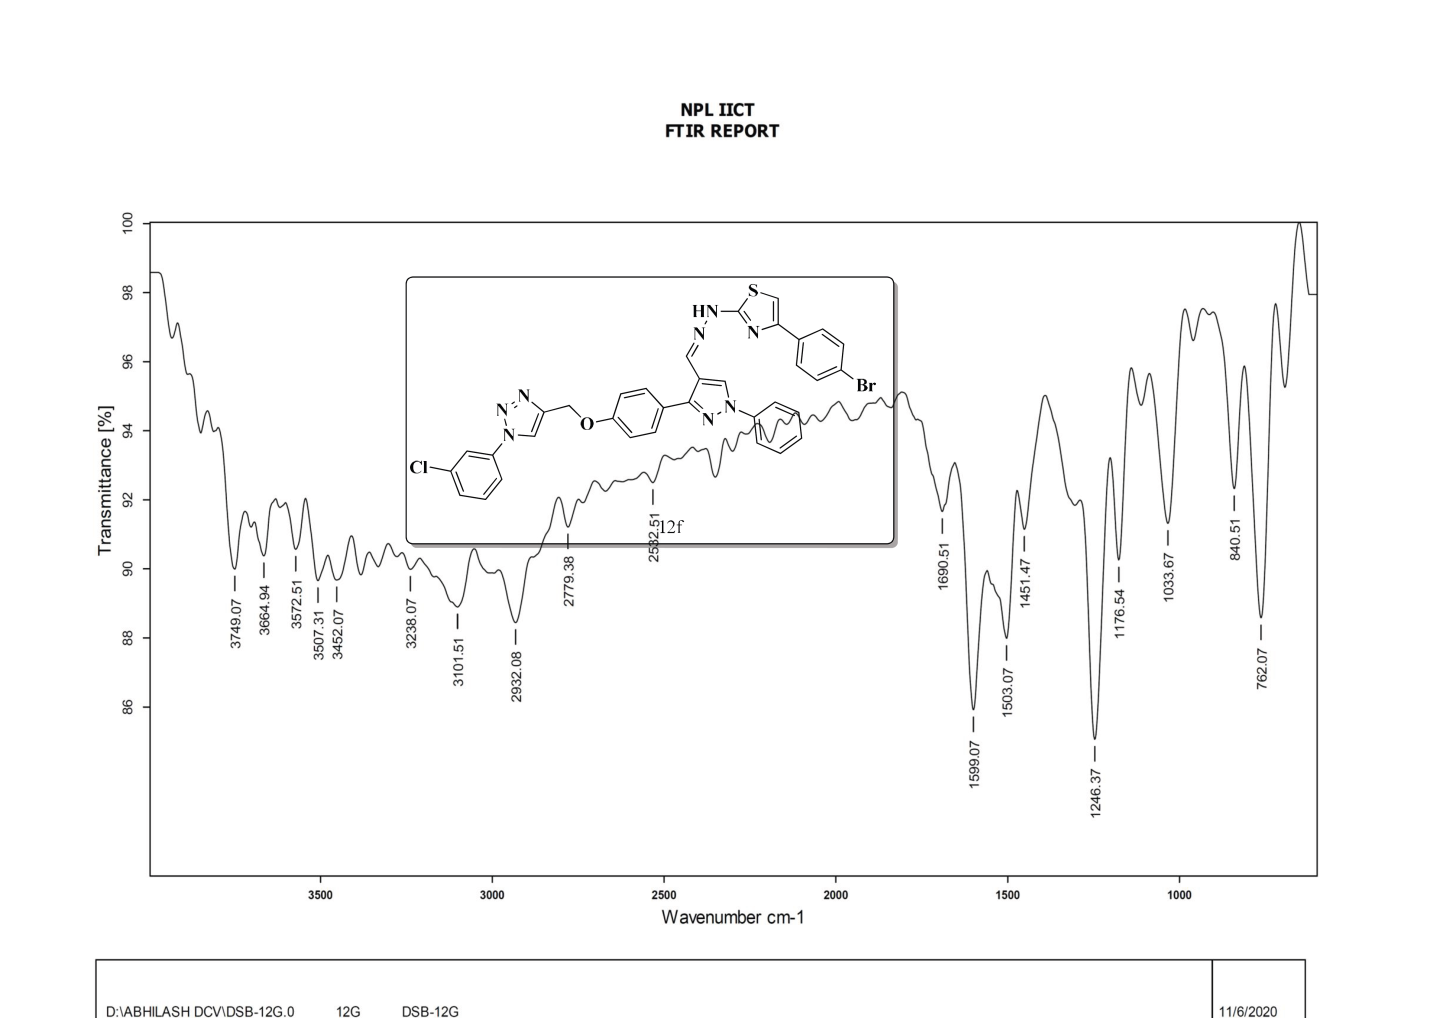


**FT-IR Spectrum of compound 12f**


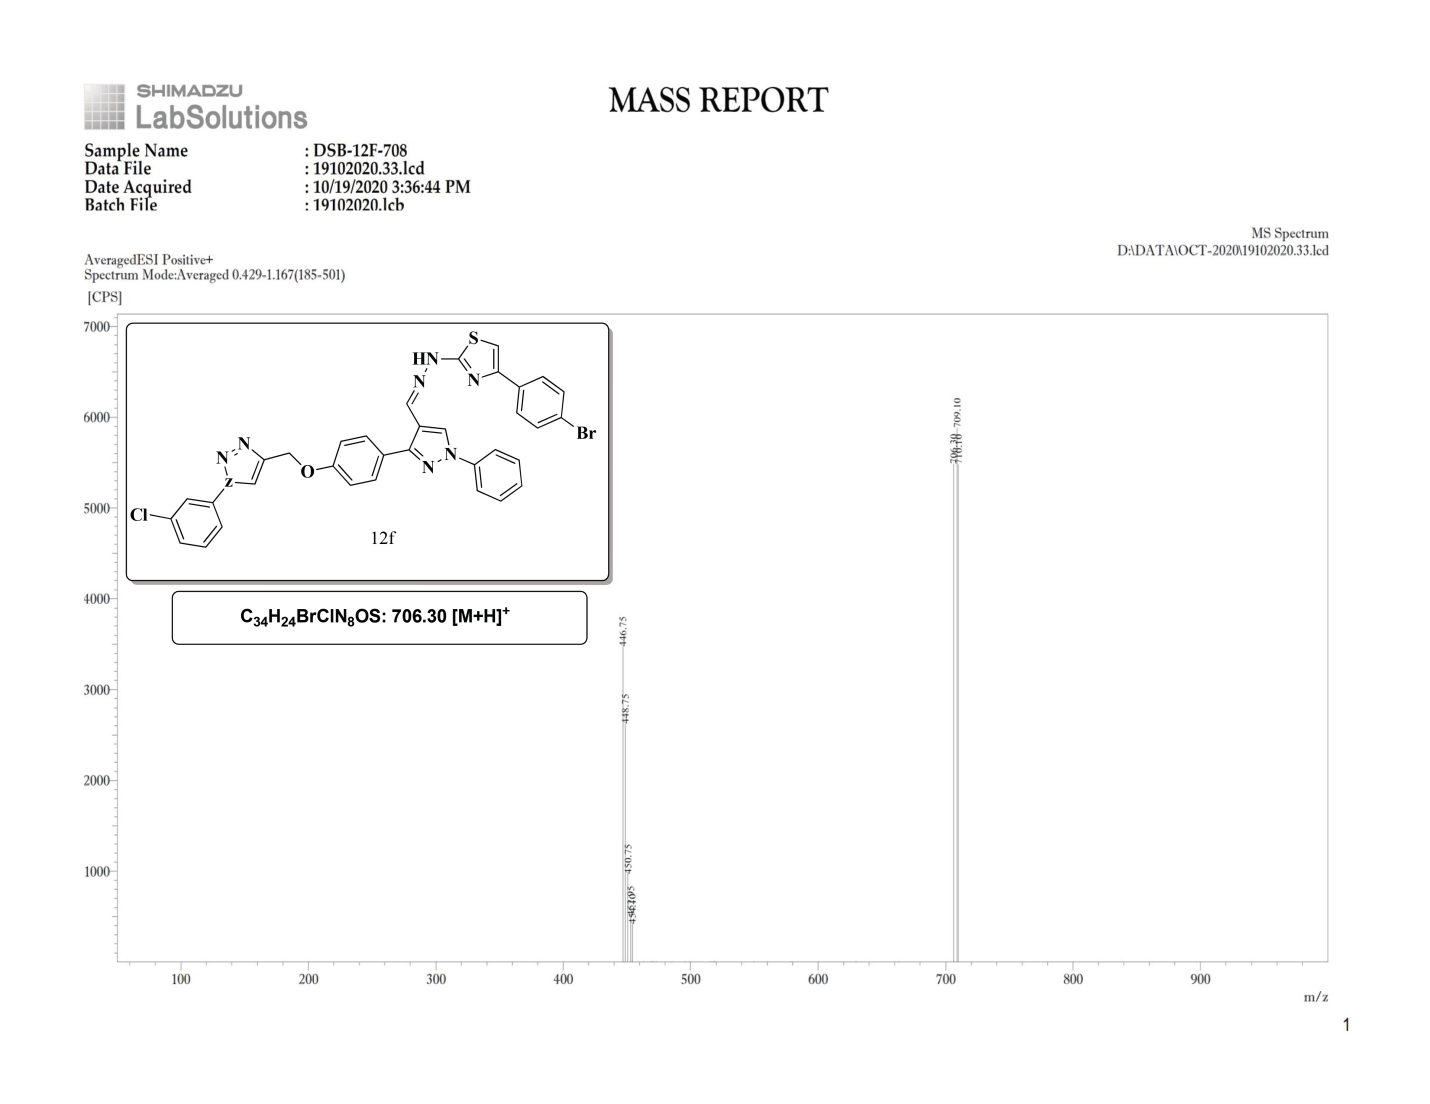
**ESI-Mass Spectrum of compound 10f**


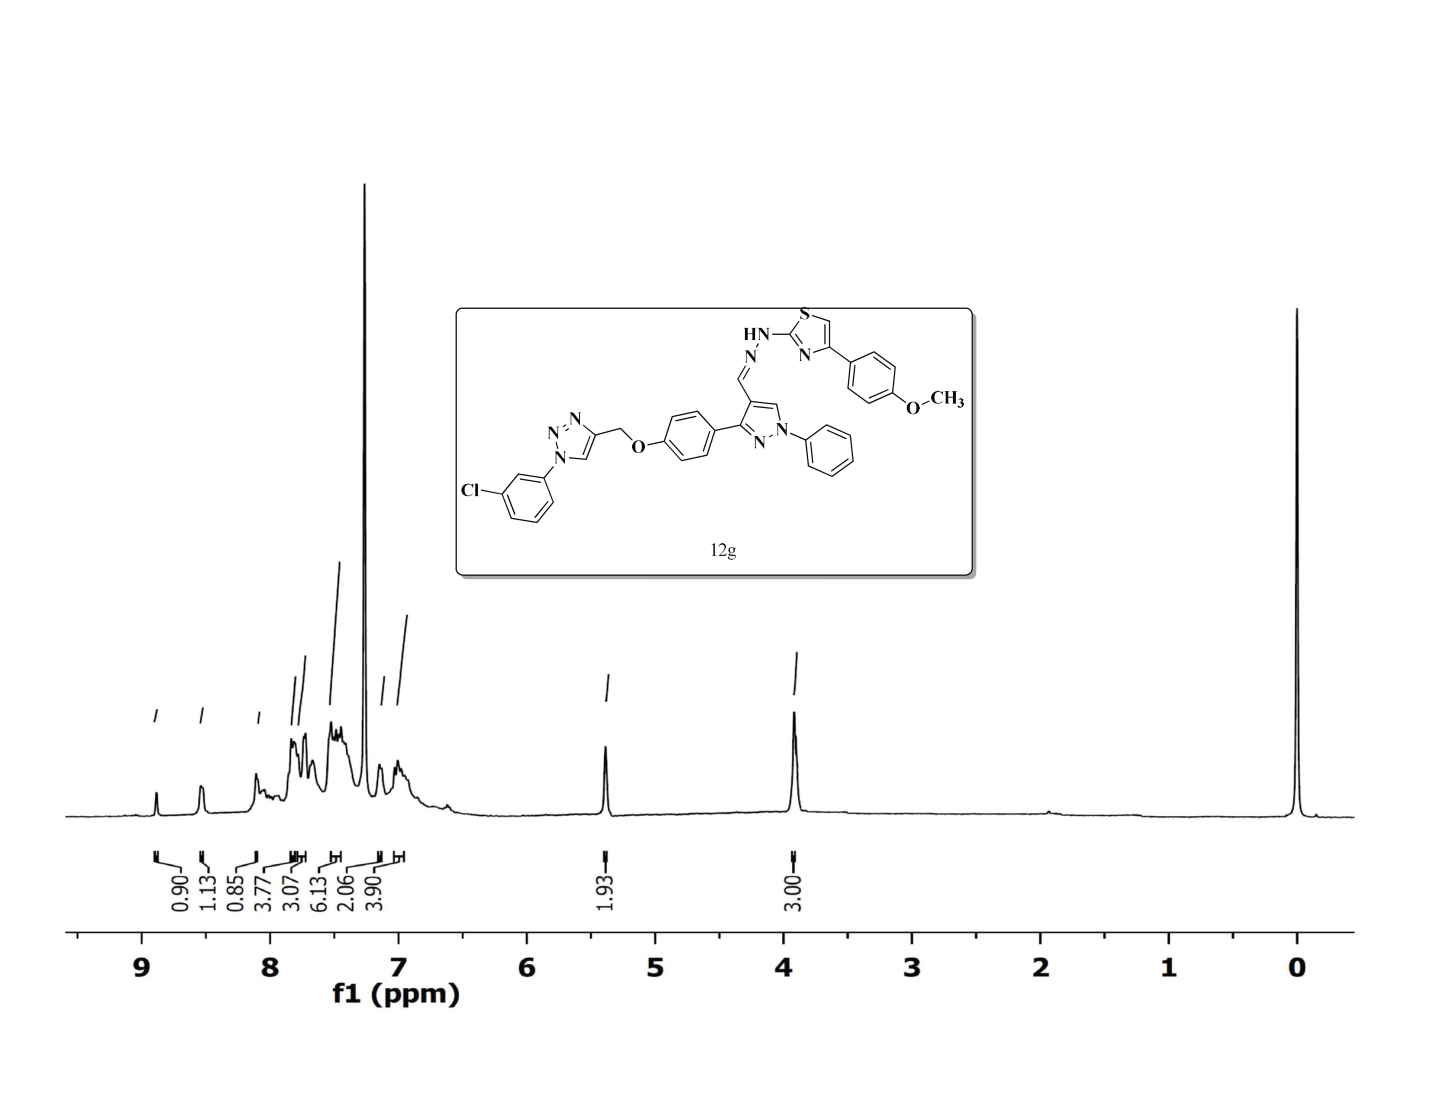
**1H NMR Spectrum of compound 12g (400 MHz, CDCl3)**


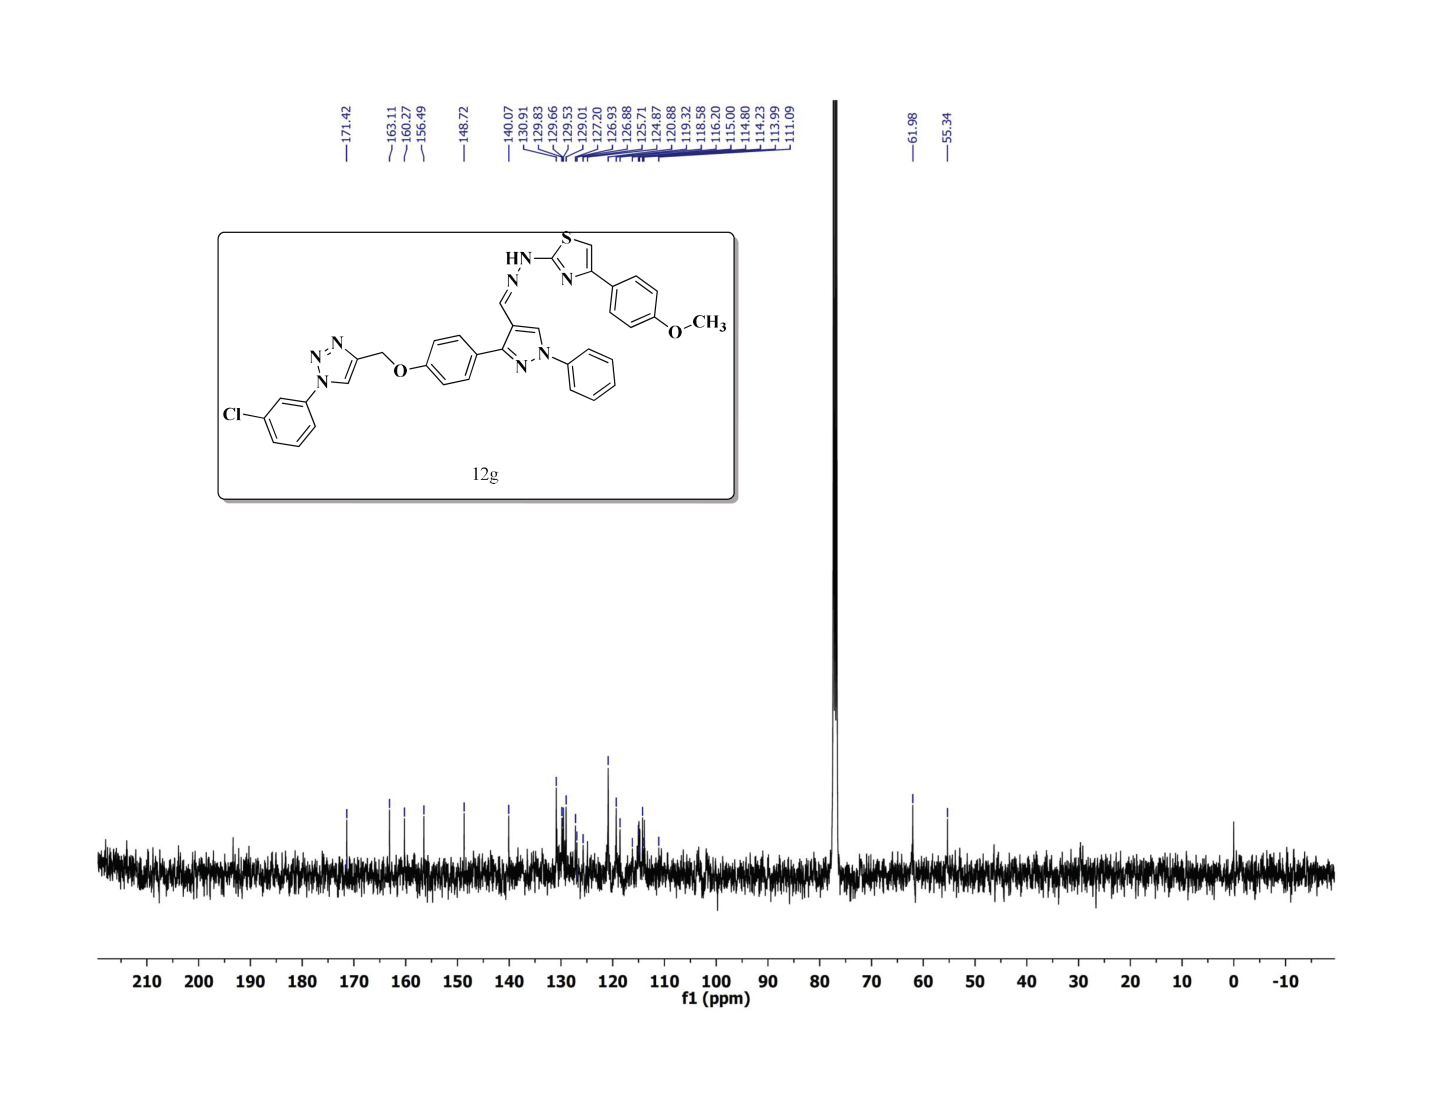
**13C NMR Spectrum of compound 10g (100 MHz, CDCl3)**


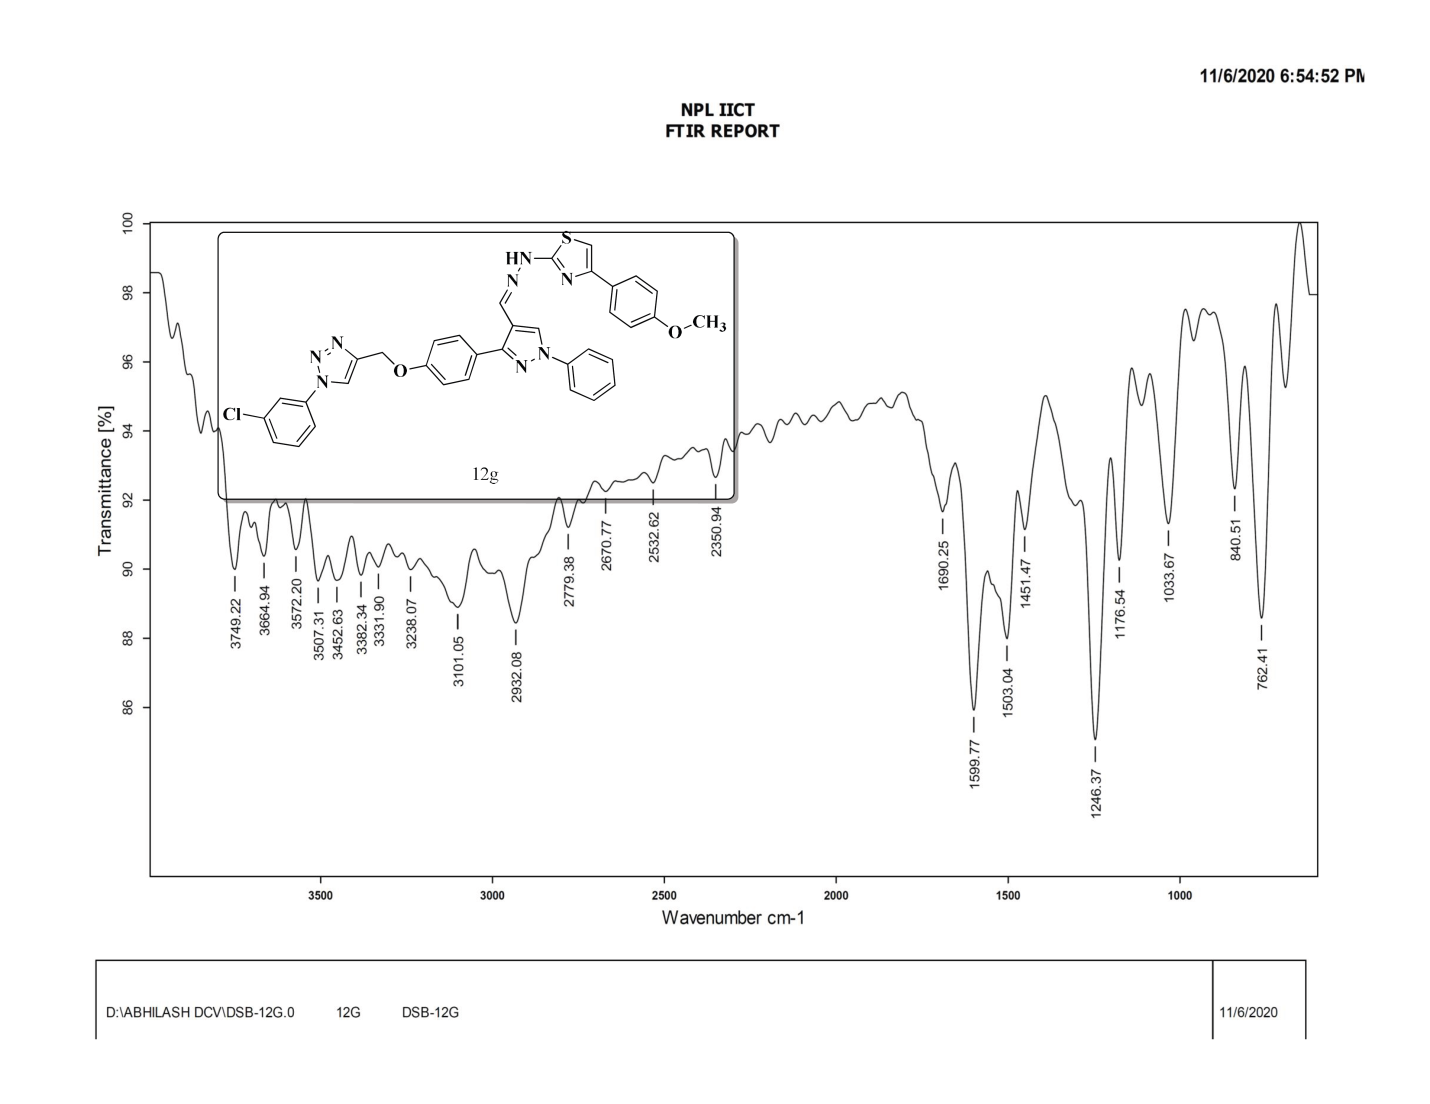


**FT-IR Spectrum of compound 12g**


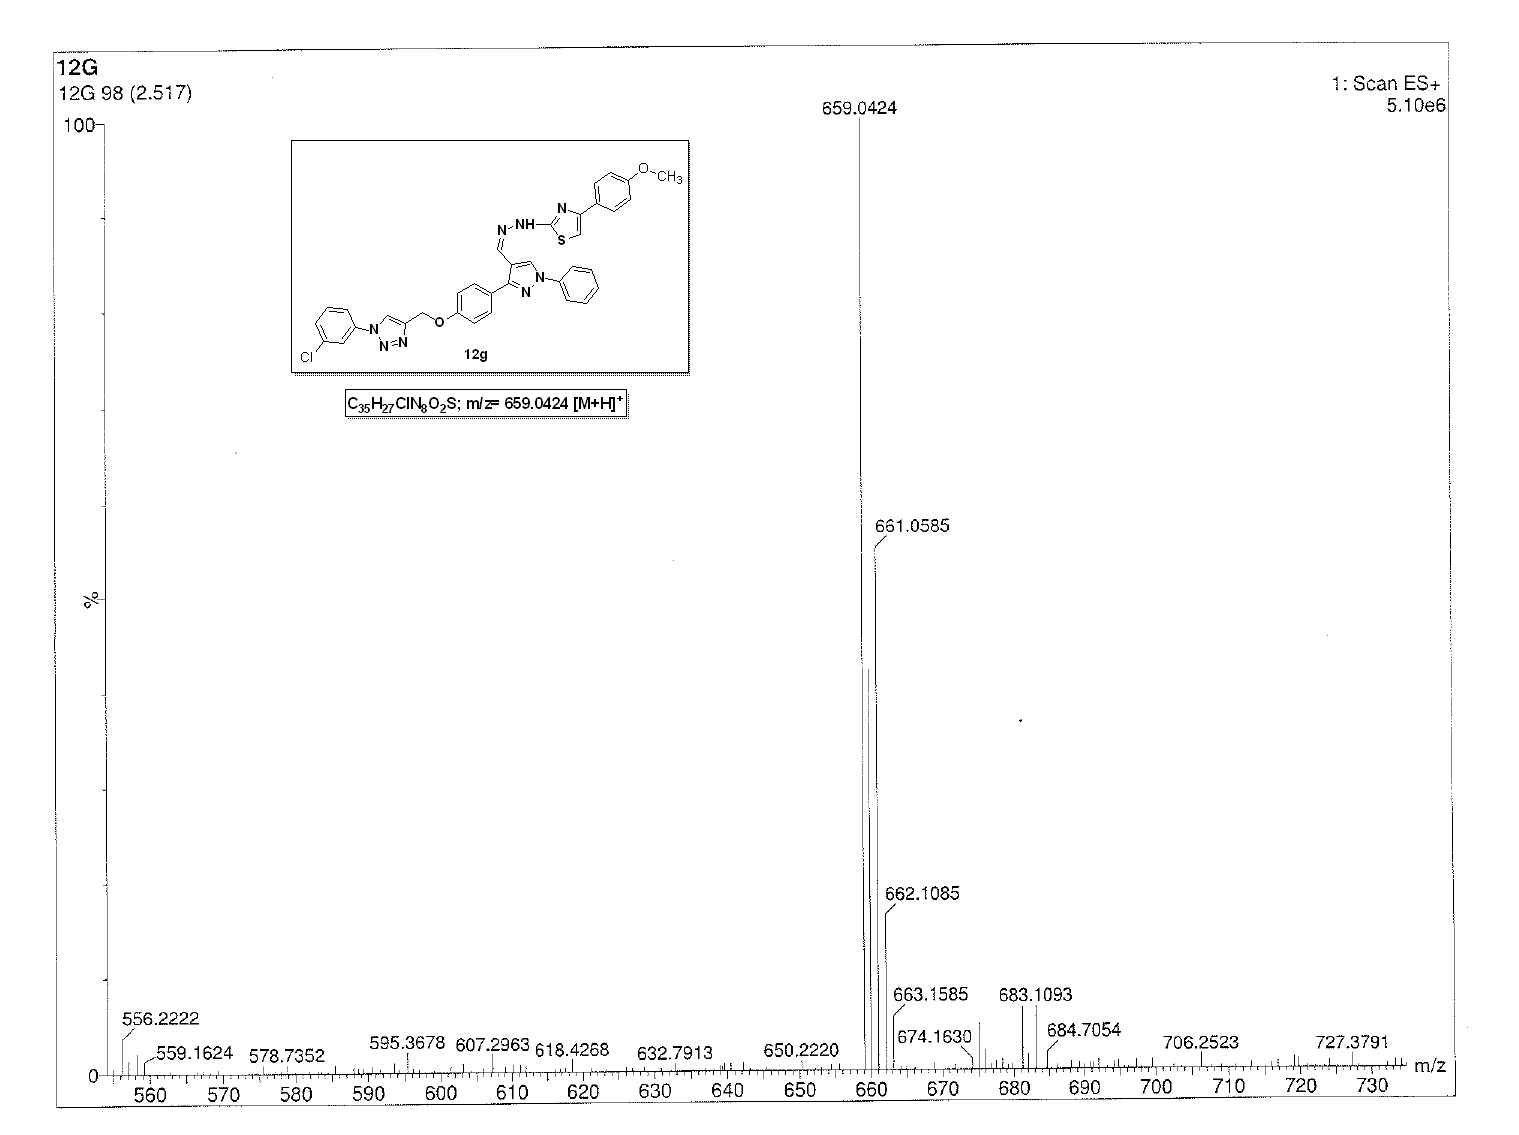


**ESI-Mass Spectrum of compound 12g**


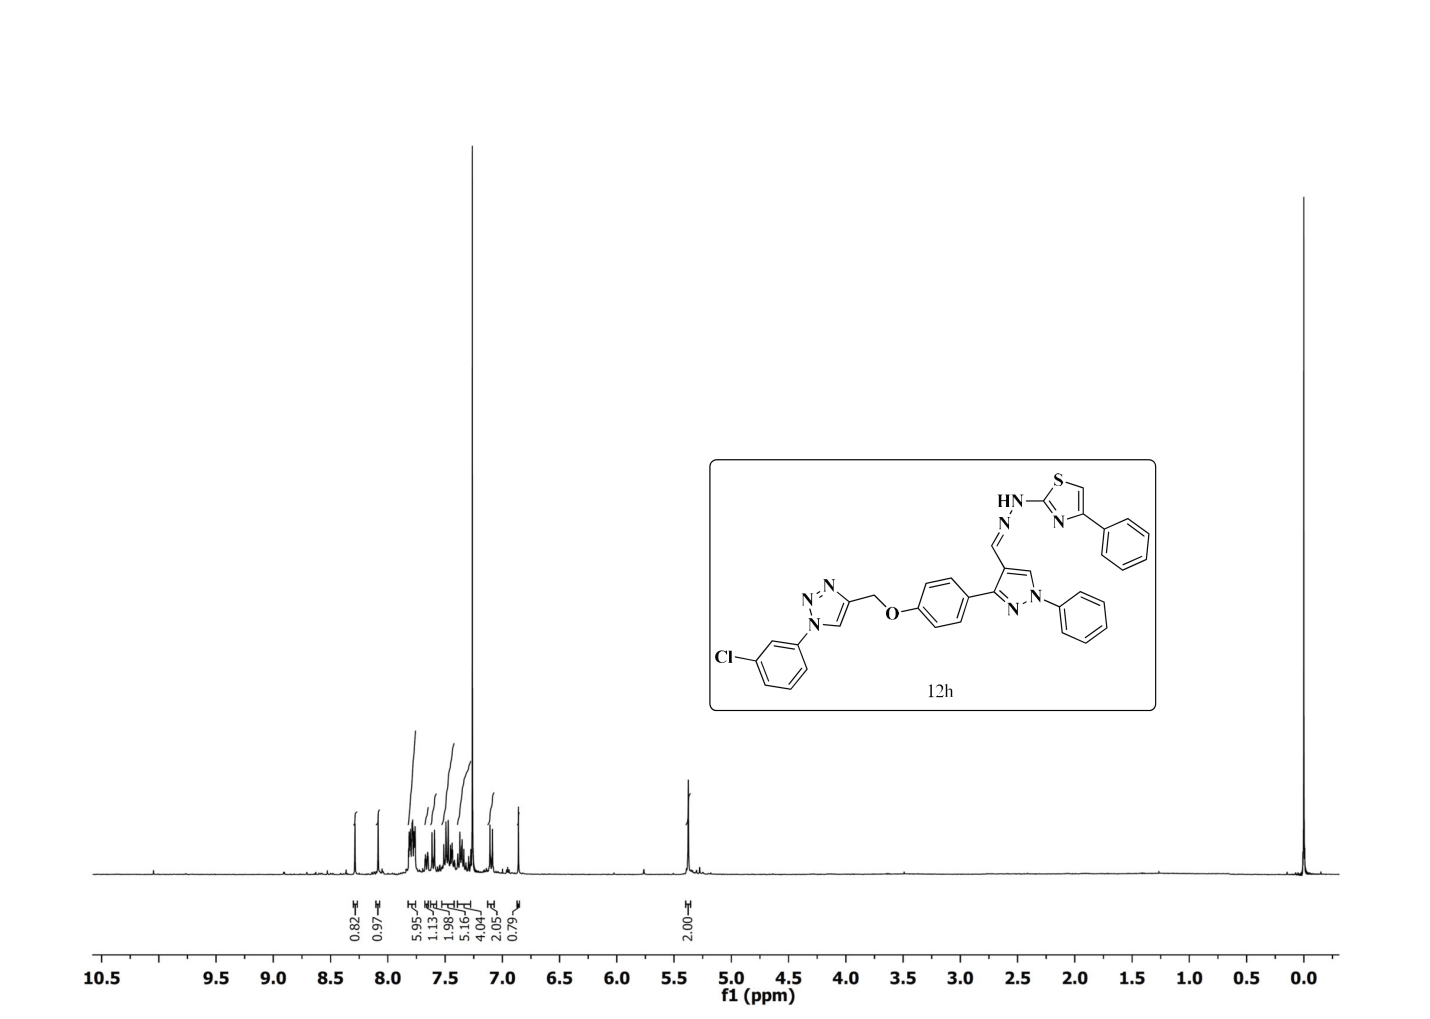


**1H NMR Spectrum of compound 12h (400 MHz, CDCl3)**


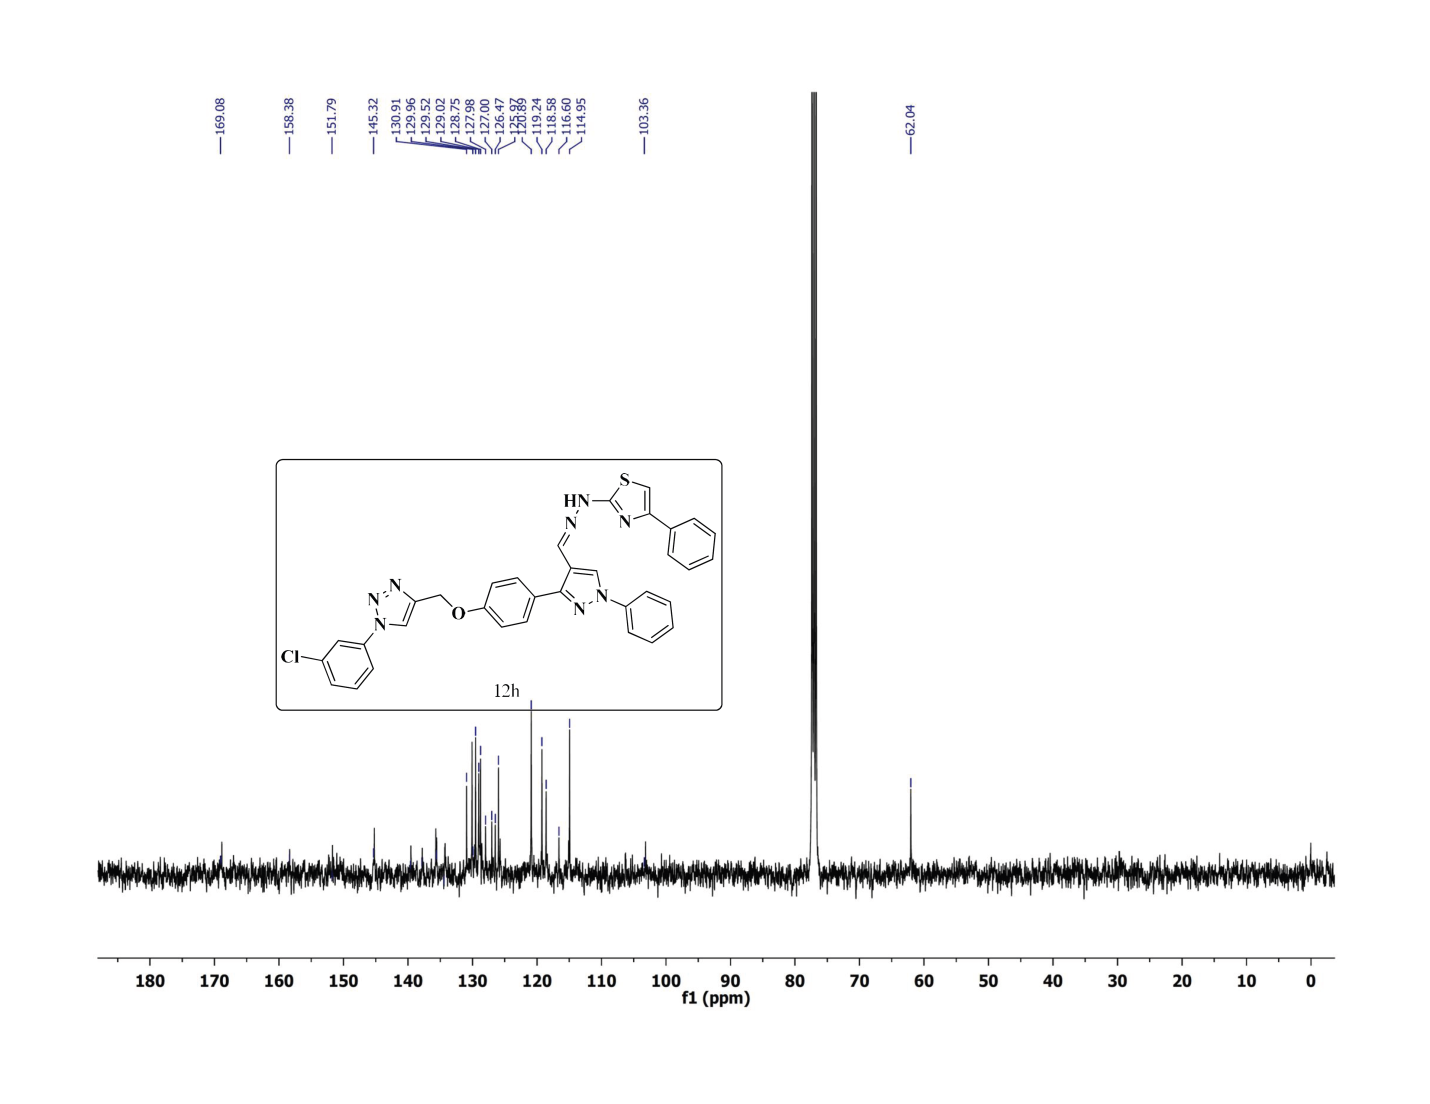
**13C NMR Spectrum of compound 12h (100 MHz, CDCl3)**


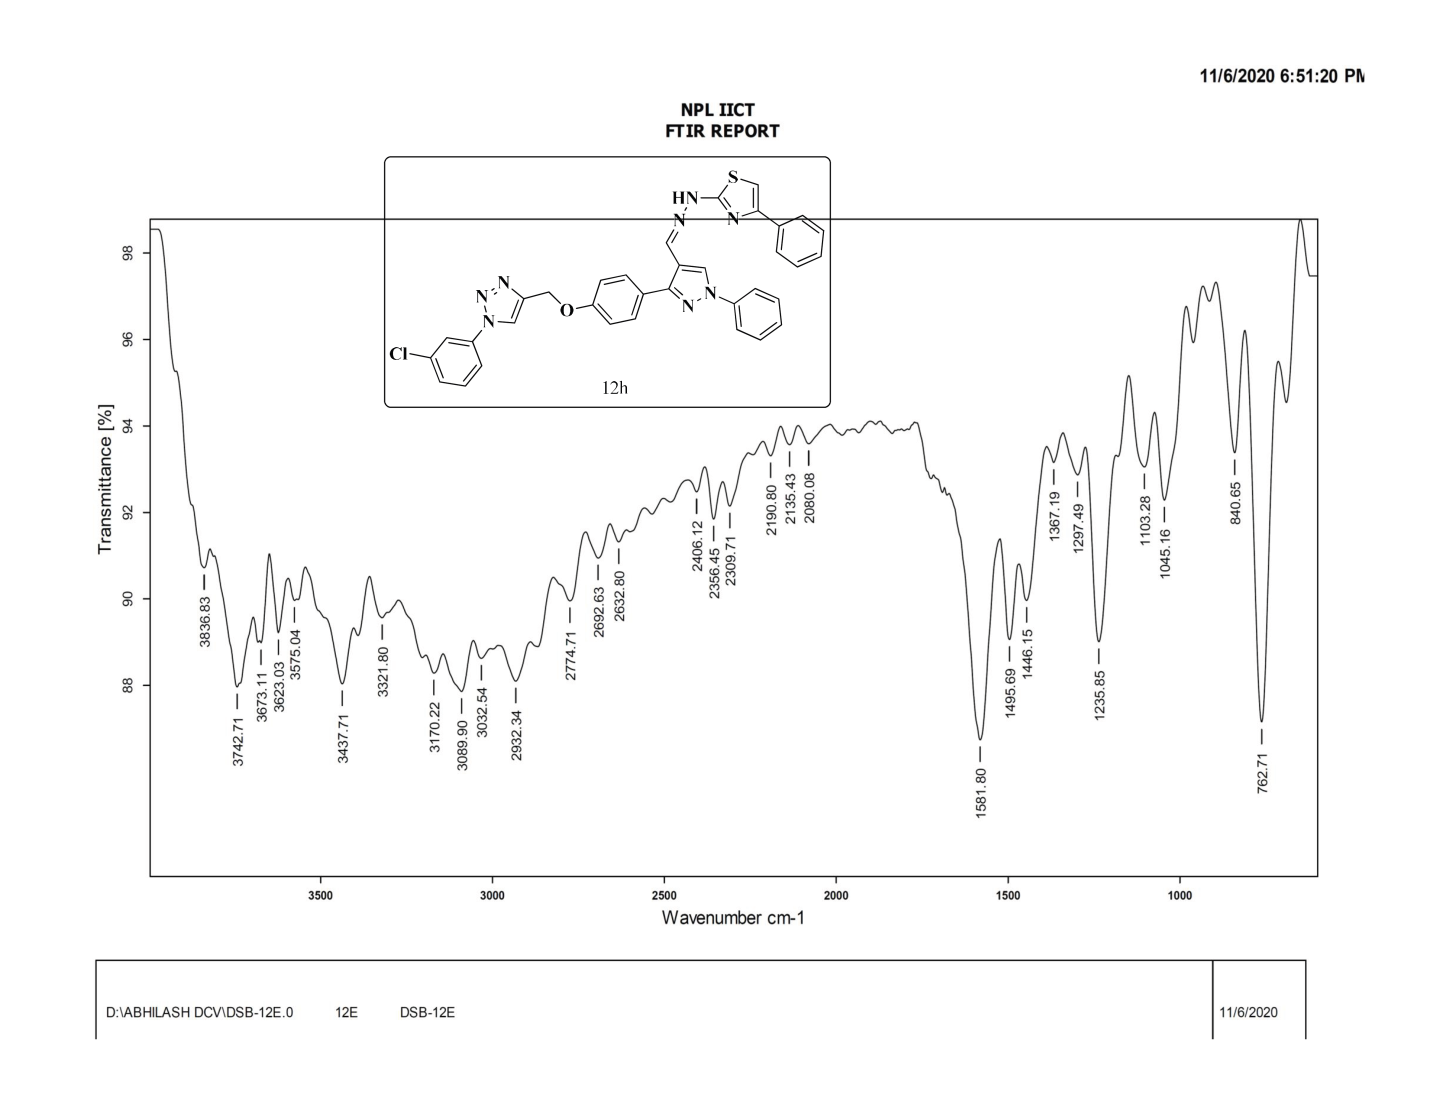
**FT-IR Spectrum of compound 10h**


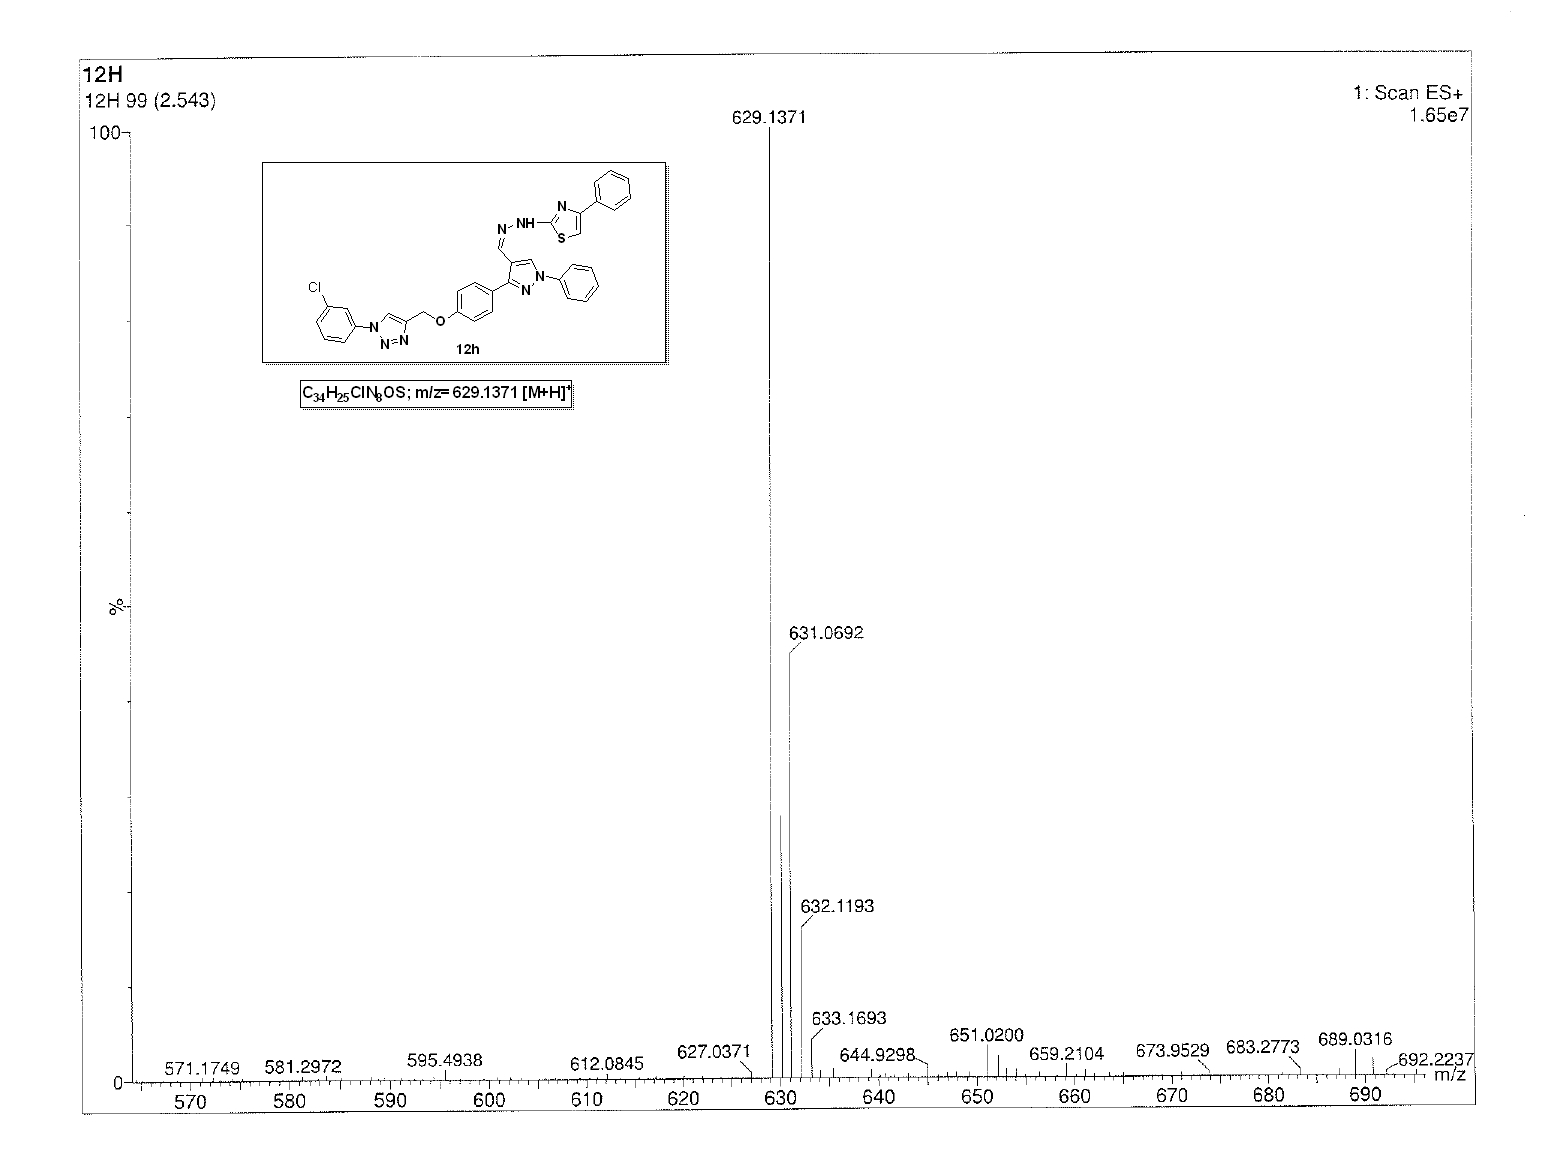


**ESI-Mass Spectrum of compound 12h**


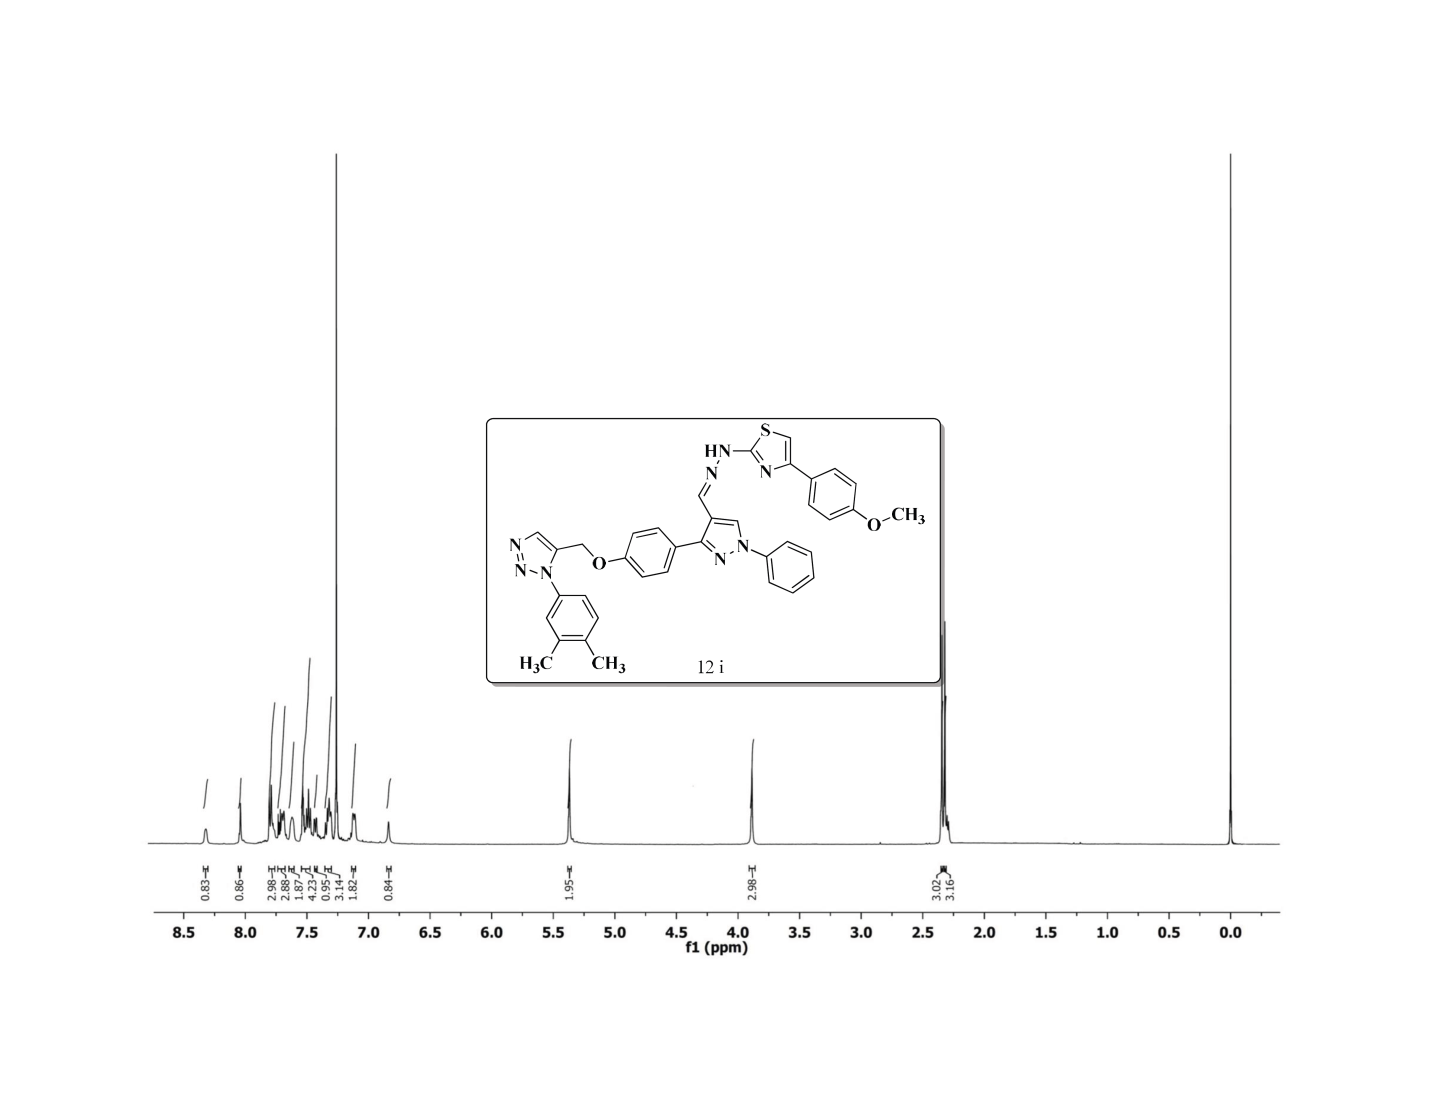
**1H NMR Spectrum of compound 12i (400 MHz, CDCl3)**


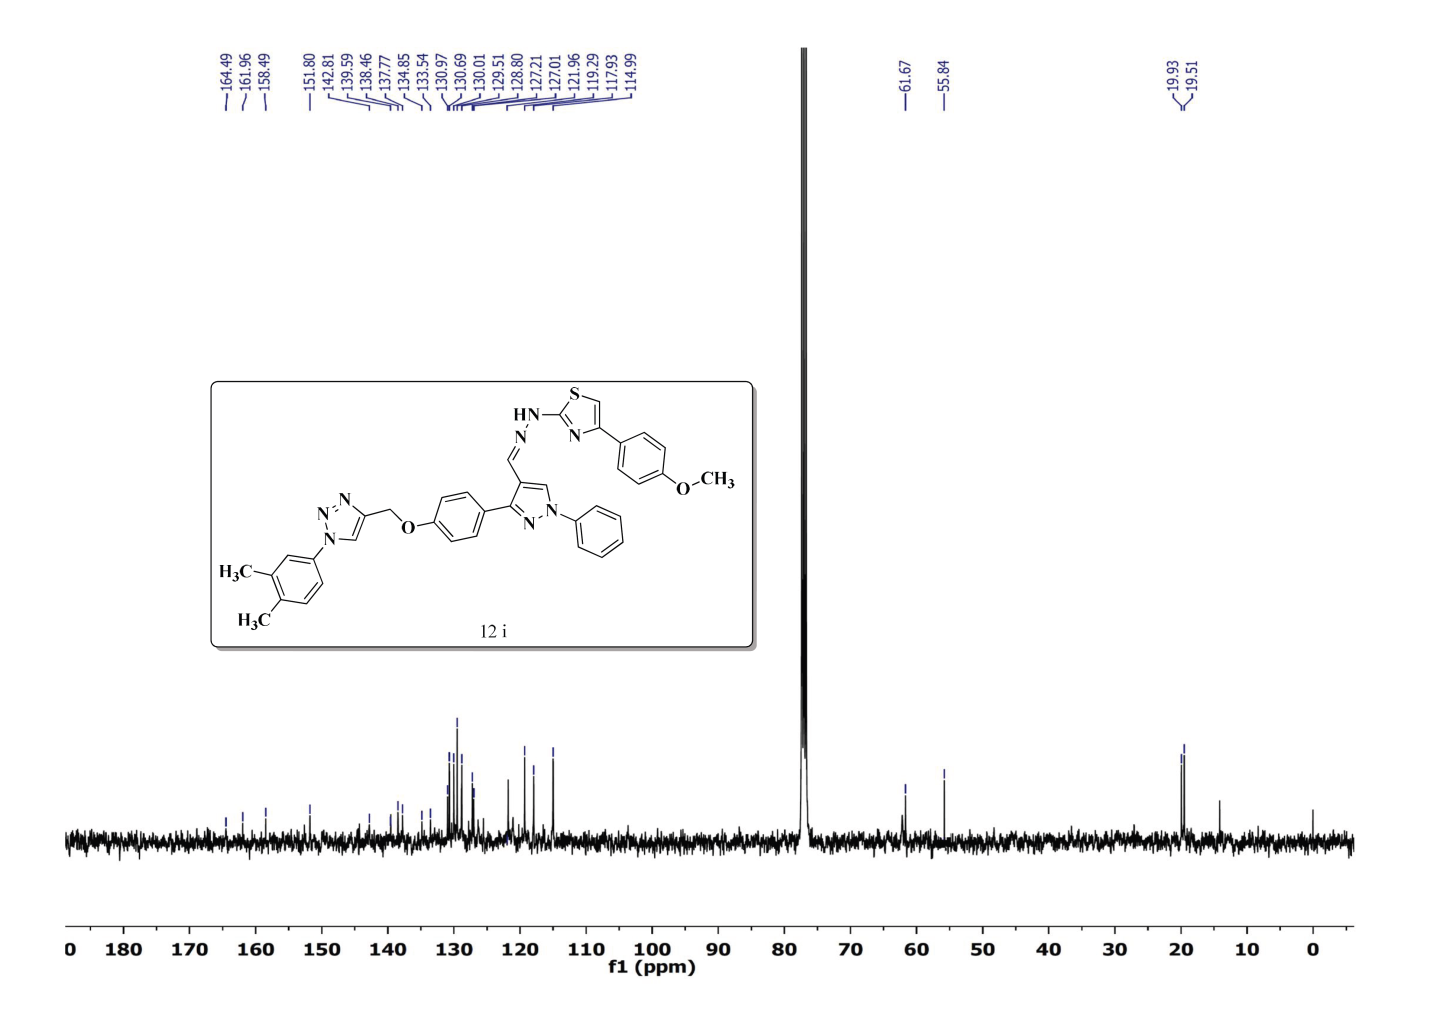


**13C NMR Spectrum of compound 12i (100 MHz, CDCl3)**


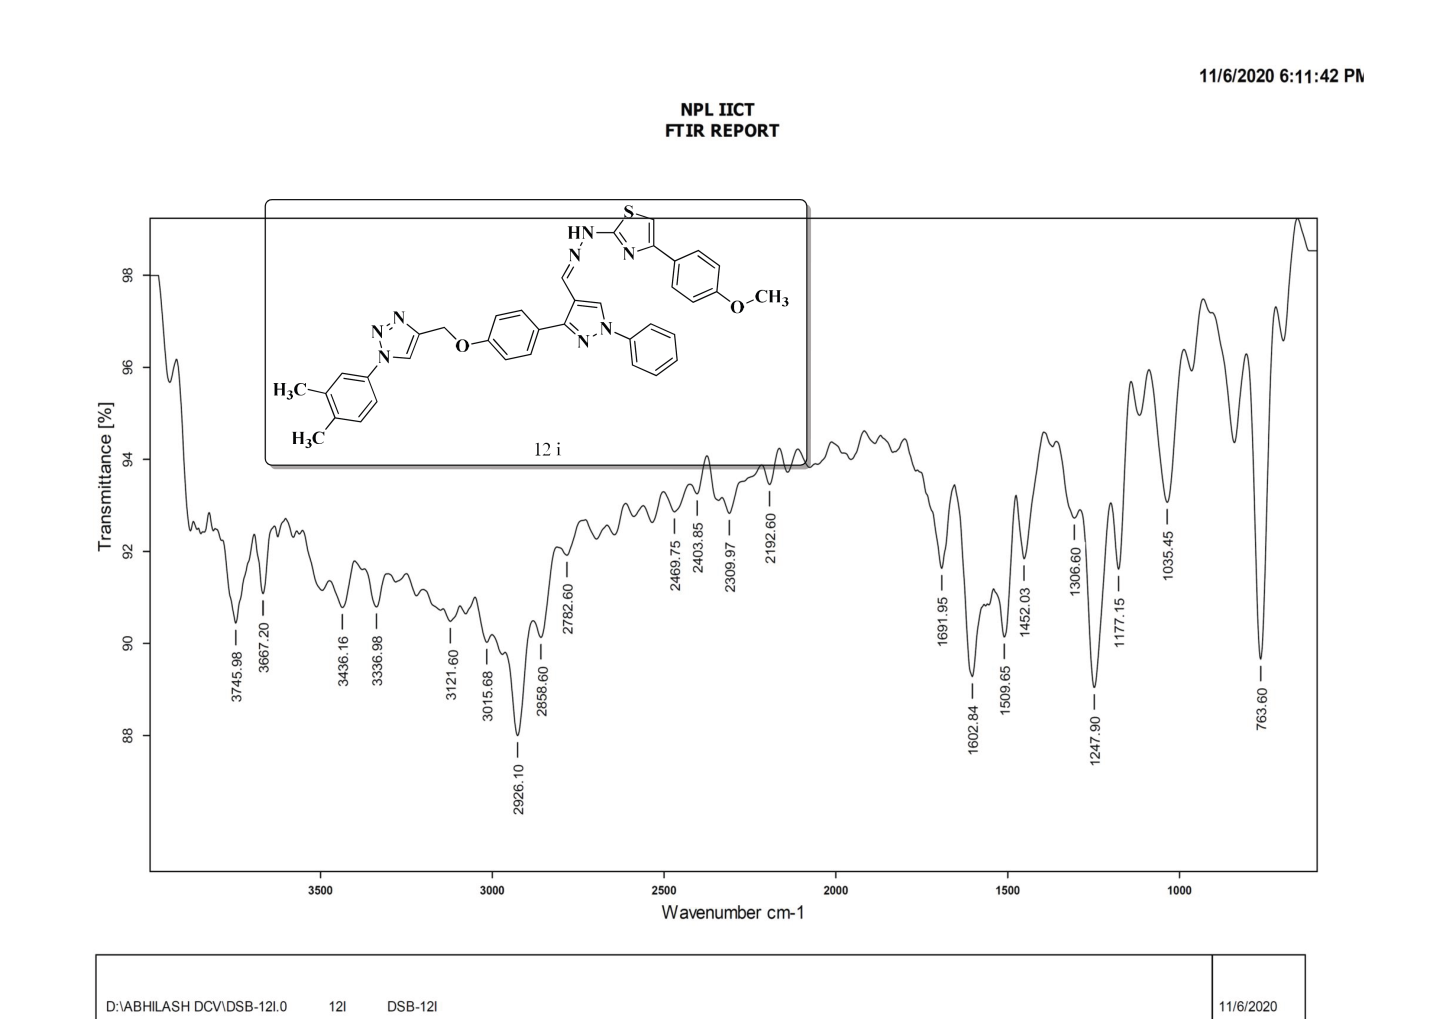
**FT-IR Spectrum of compound 10i**


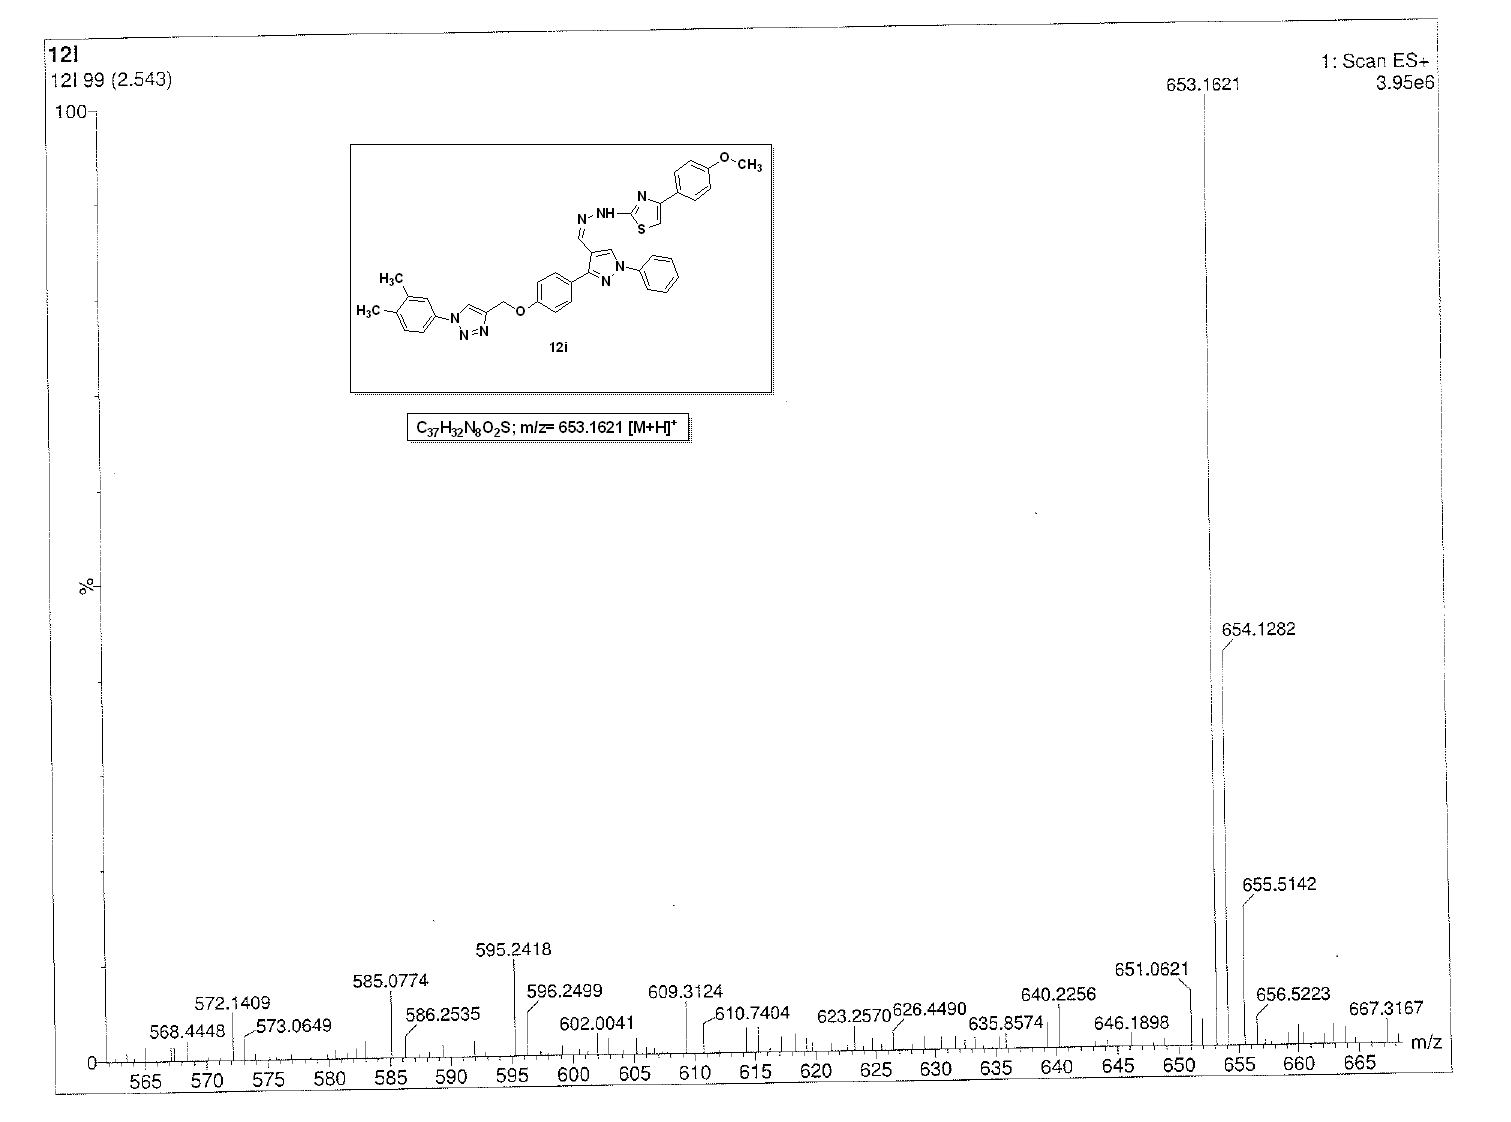


**ESI-Mass Spectrum of compound 12i**


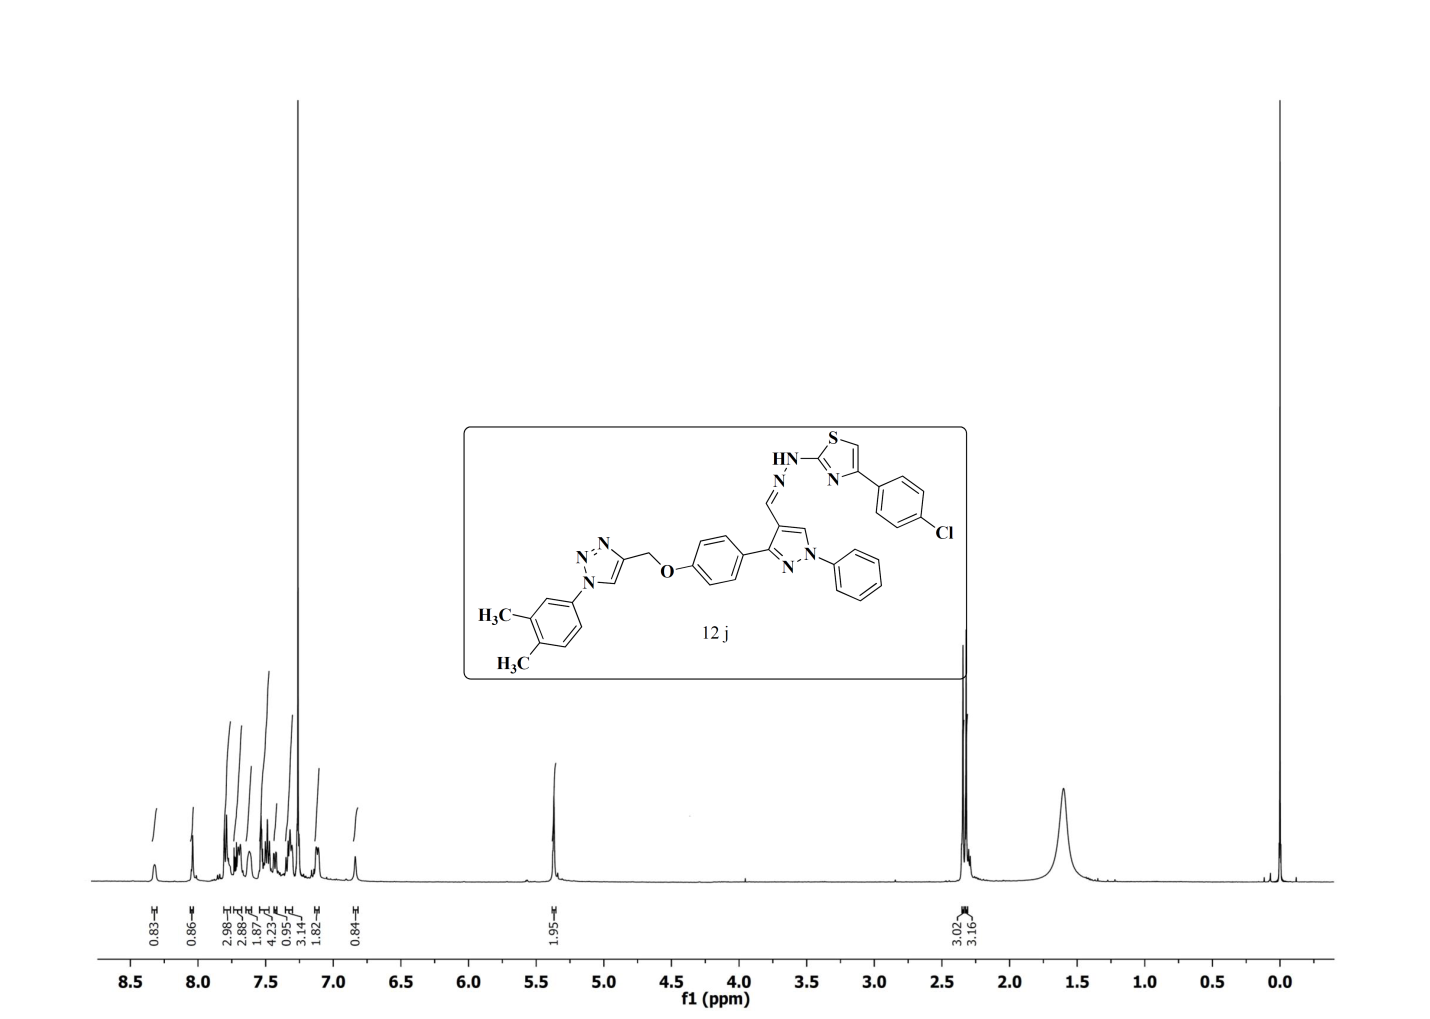
**1H NMR Spectrum of compound 12j (400 MHz, CDCl3)**


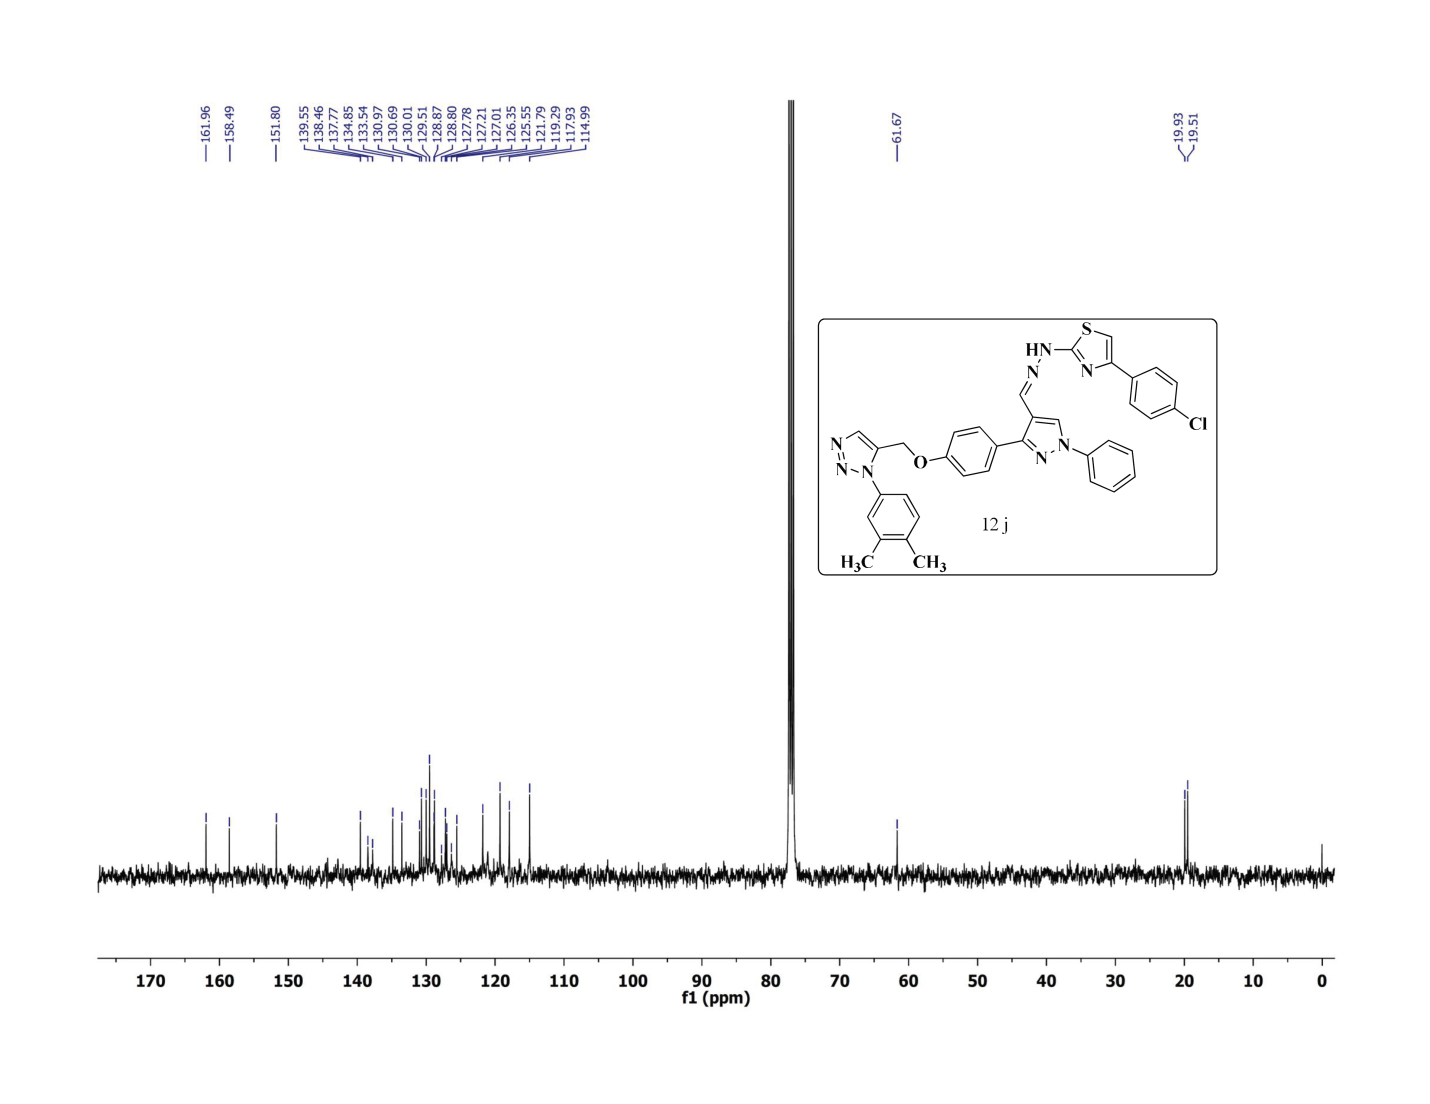
**13C NMR Spectrum of compound 12j (100 MHz, CDCl3)**


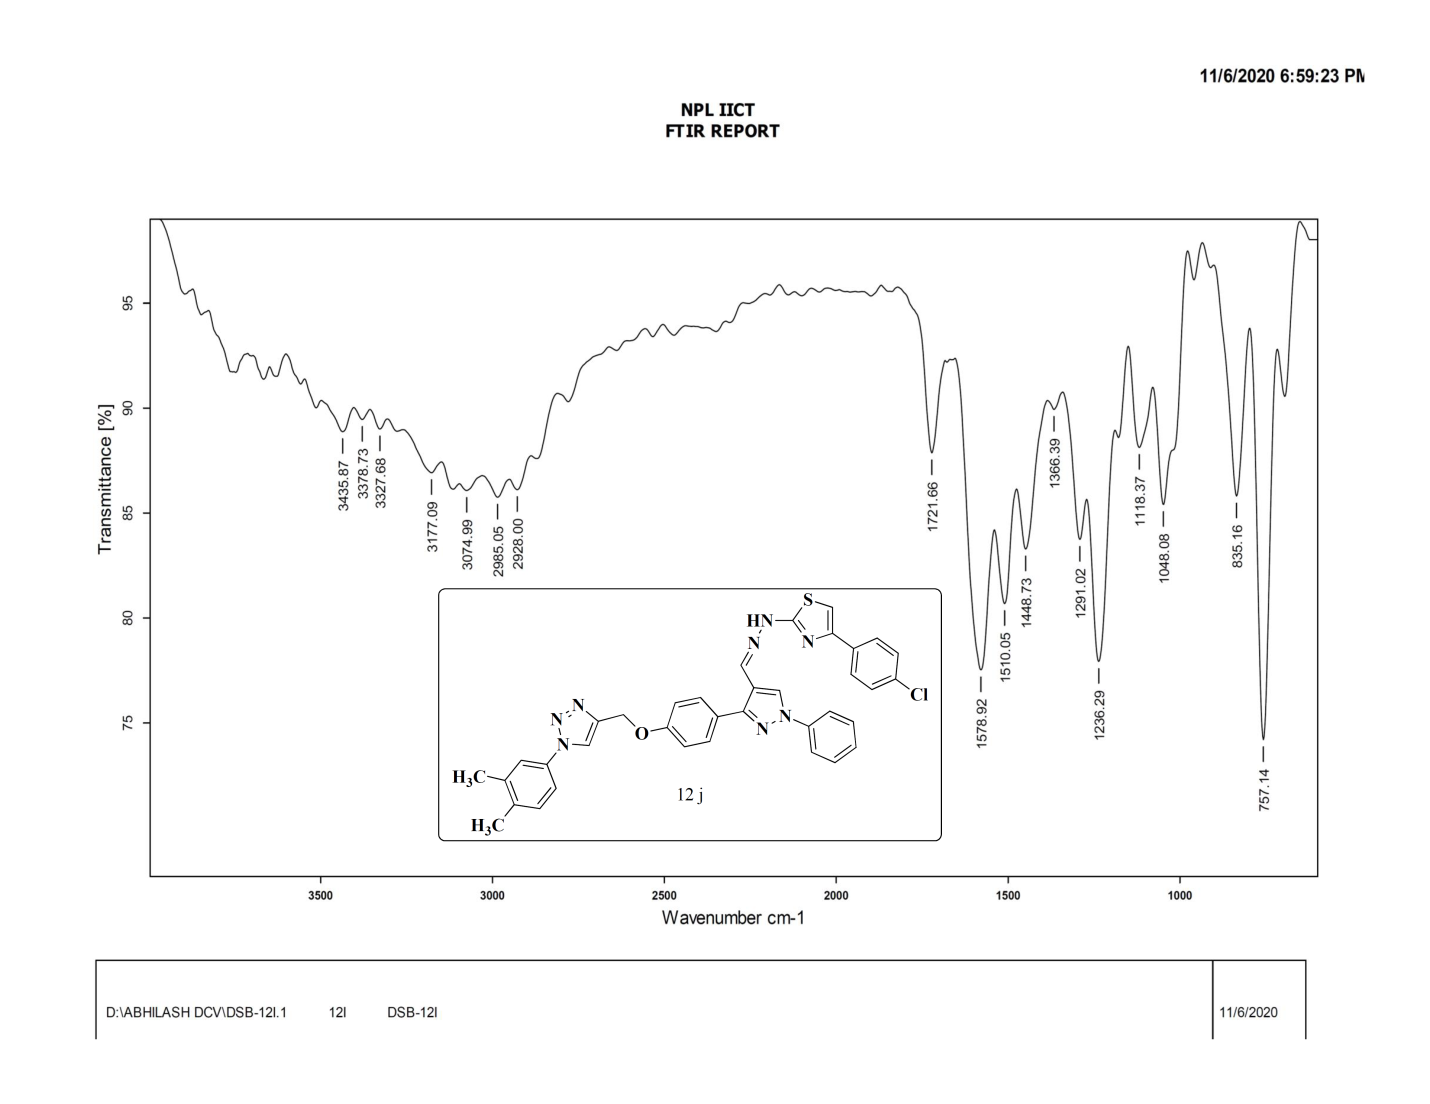
**FT-IR Spectrum of compound 12j**


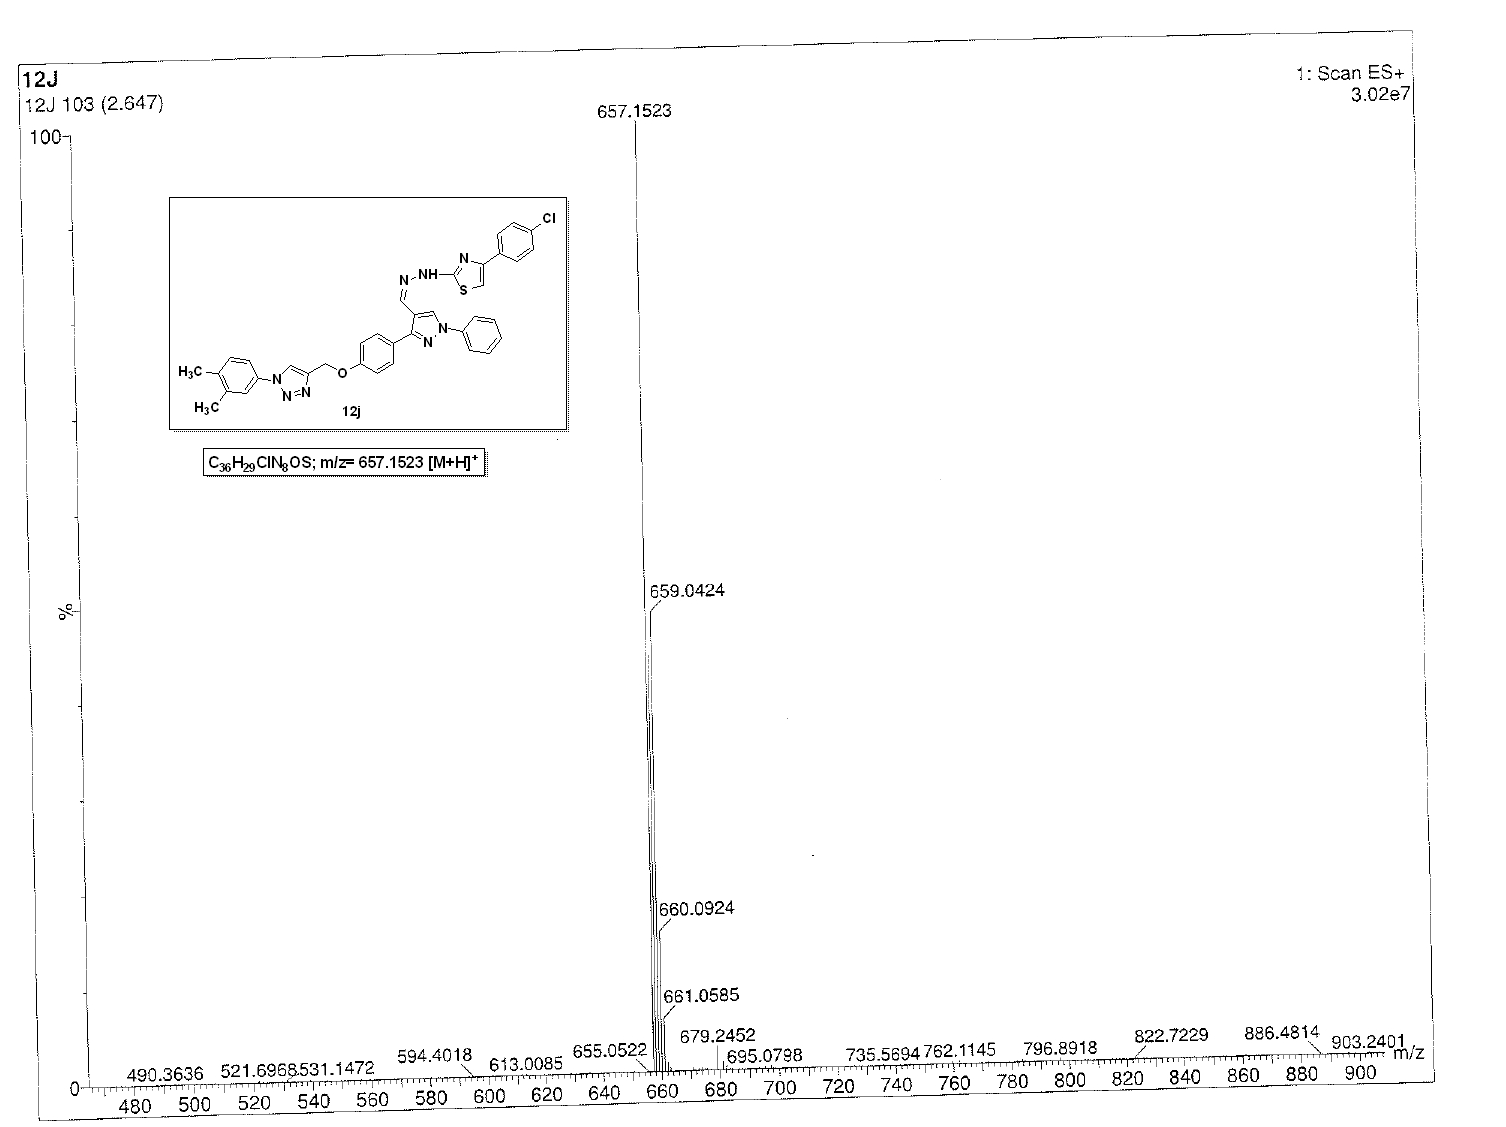
**ESI-Mass Spectrum of compound 12j**


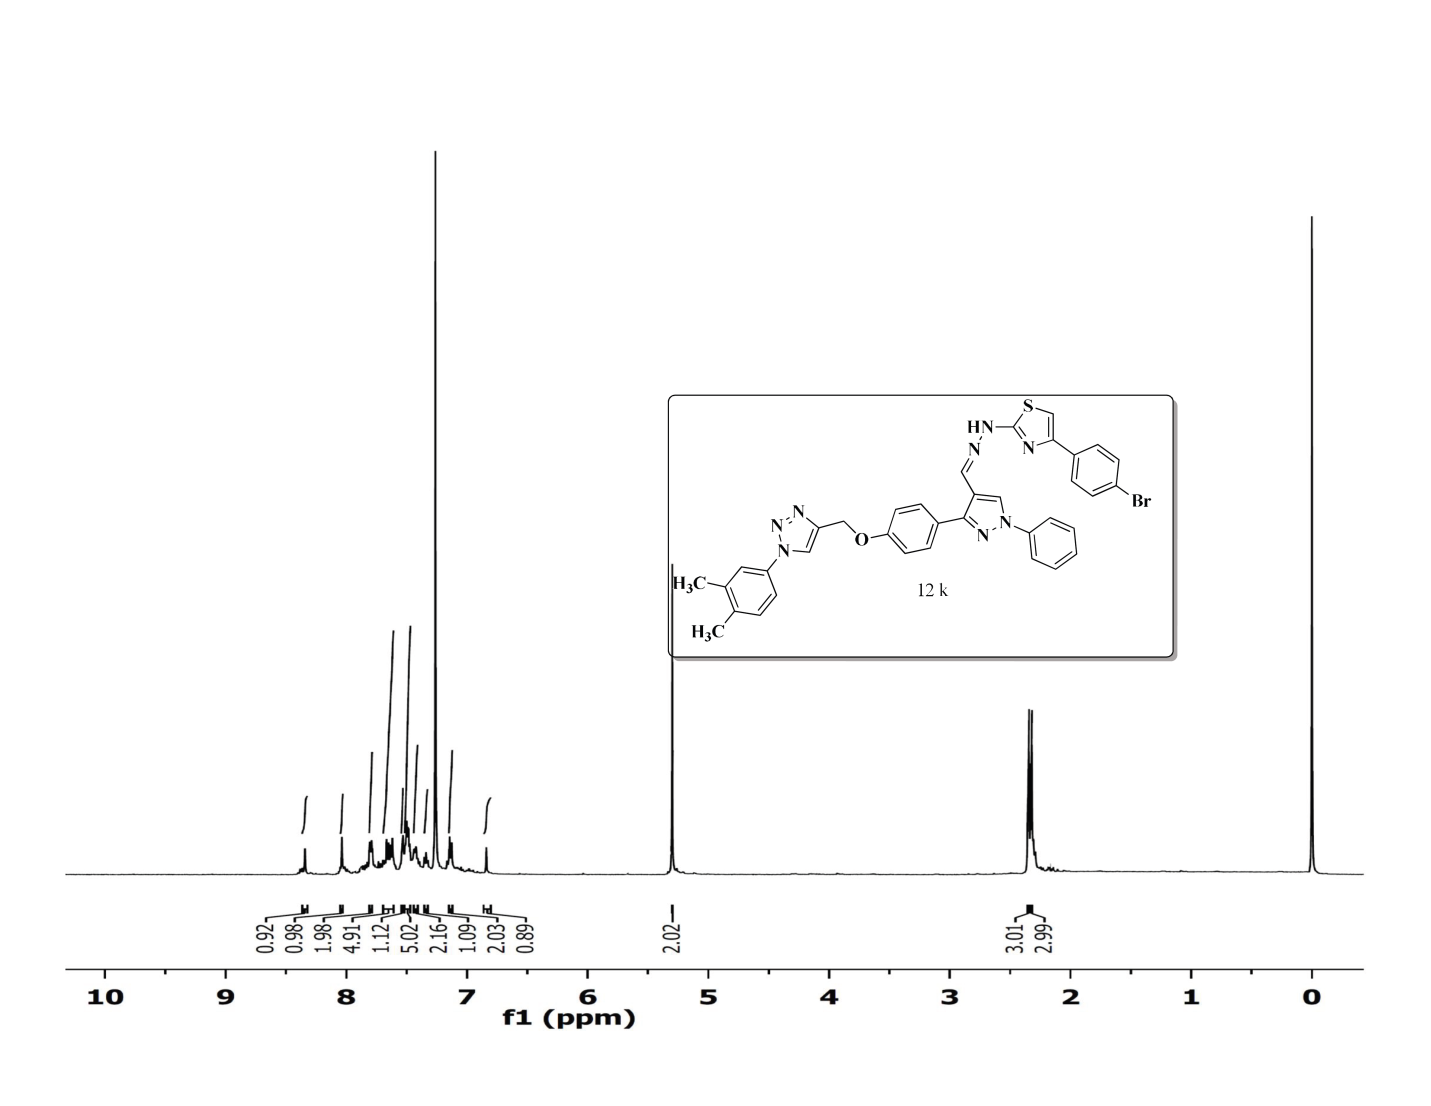
**1H NMR Spectrum of compound 12k (400 MHz, CDCl3)**


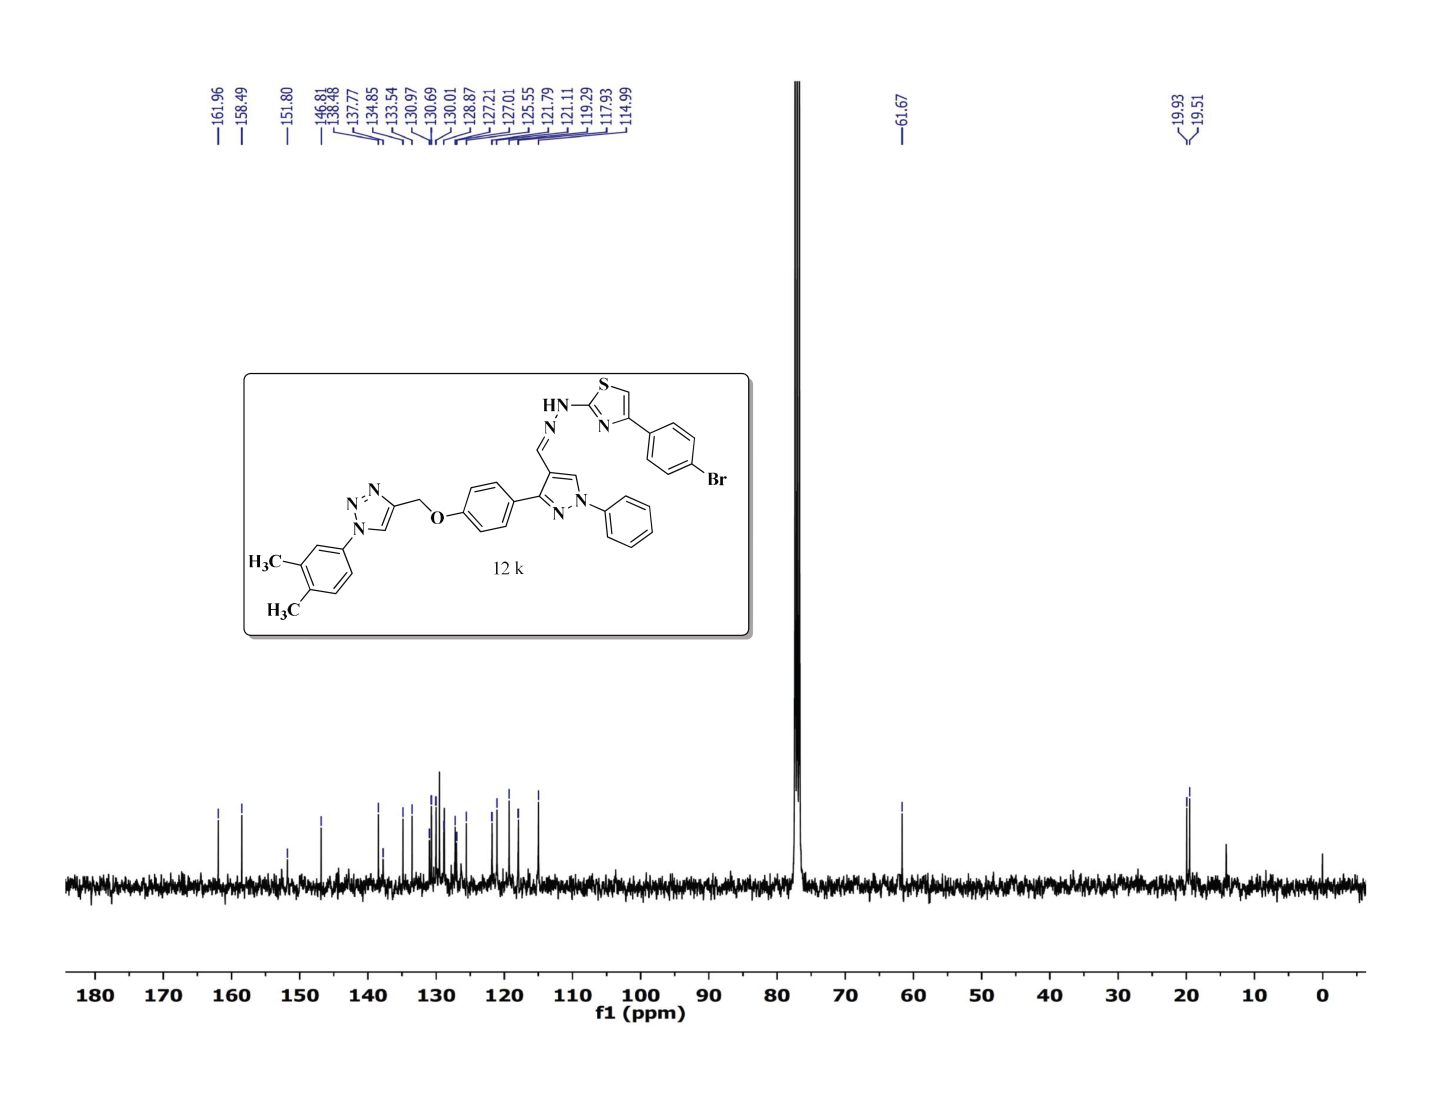
**13C NMR Spectrum of compound 12k (100 MHz, CDCl3)**


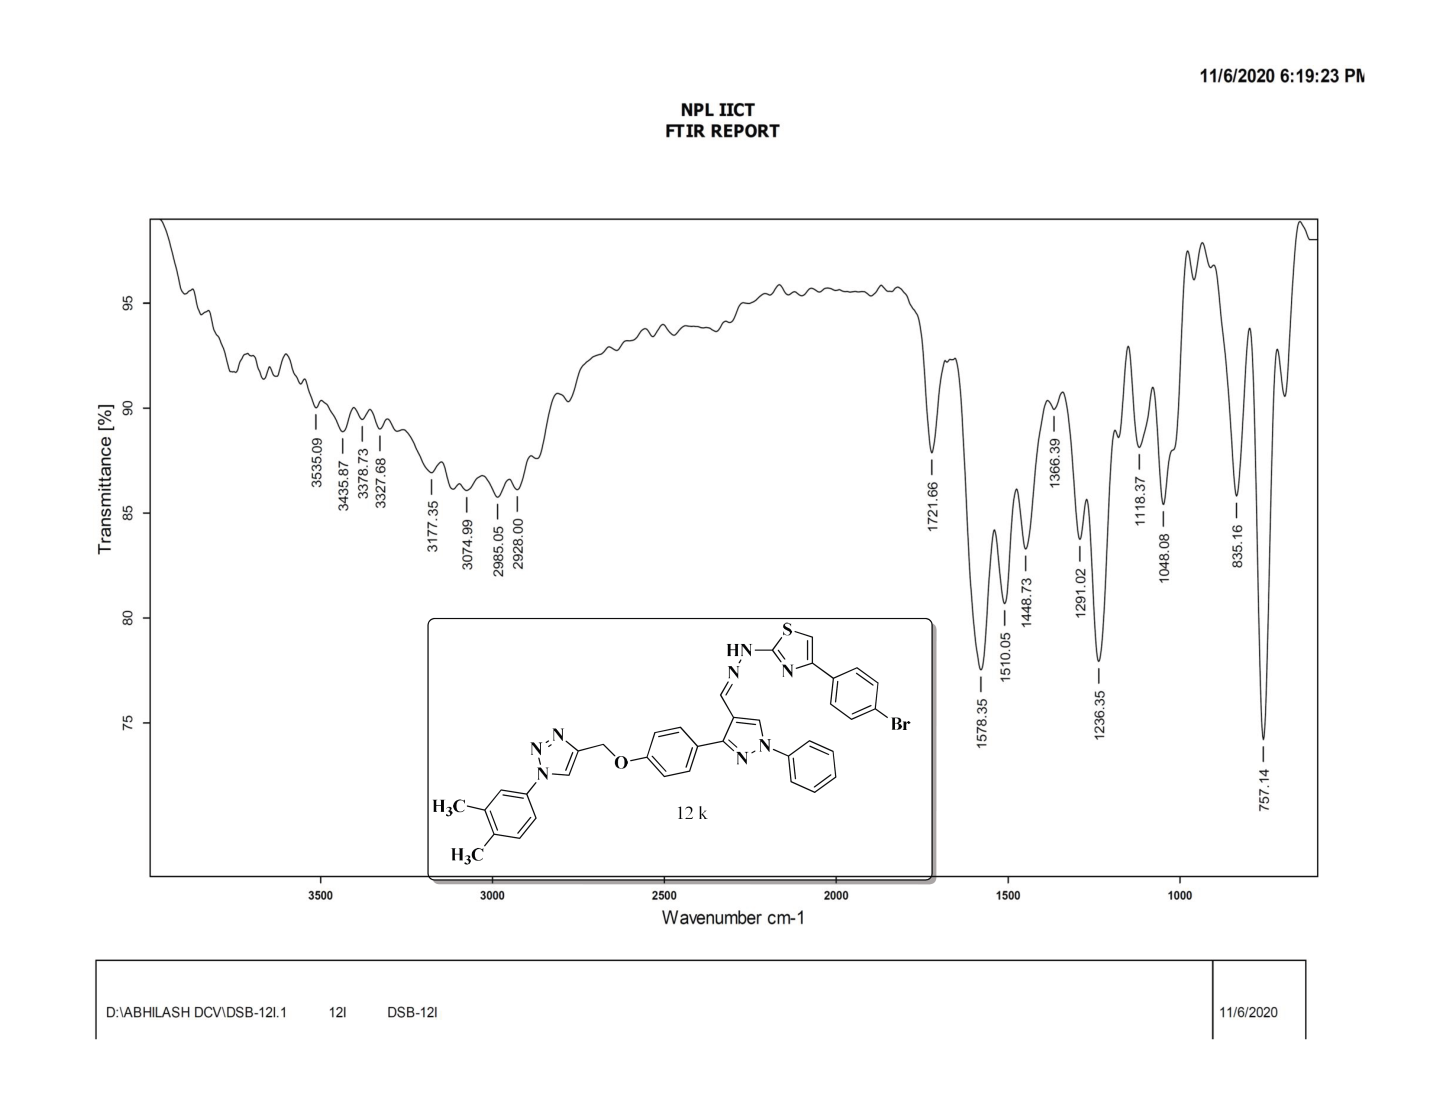
**FT-IR Spectrum of compound 12k**


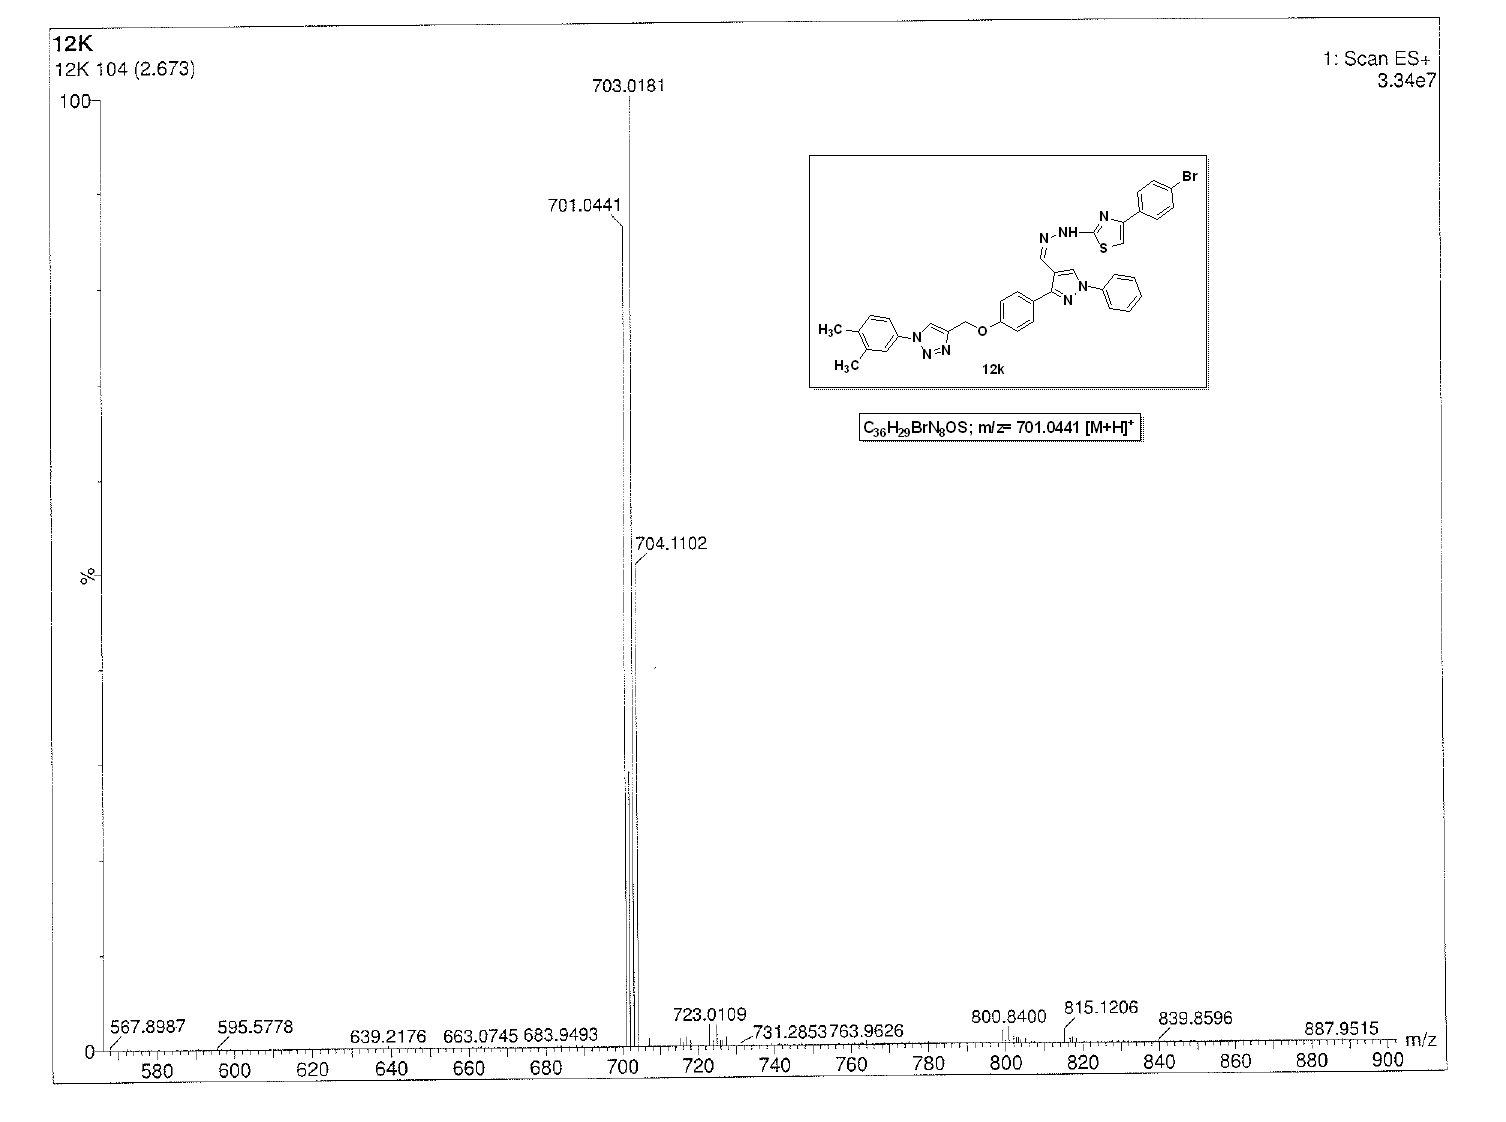
**ESI-Mass Spectrum of compound 12k**


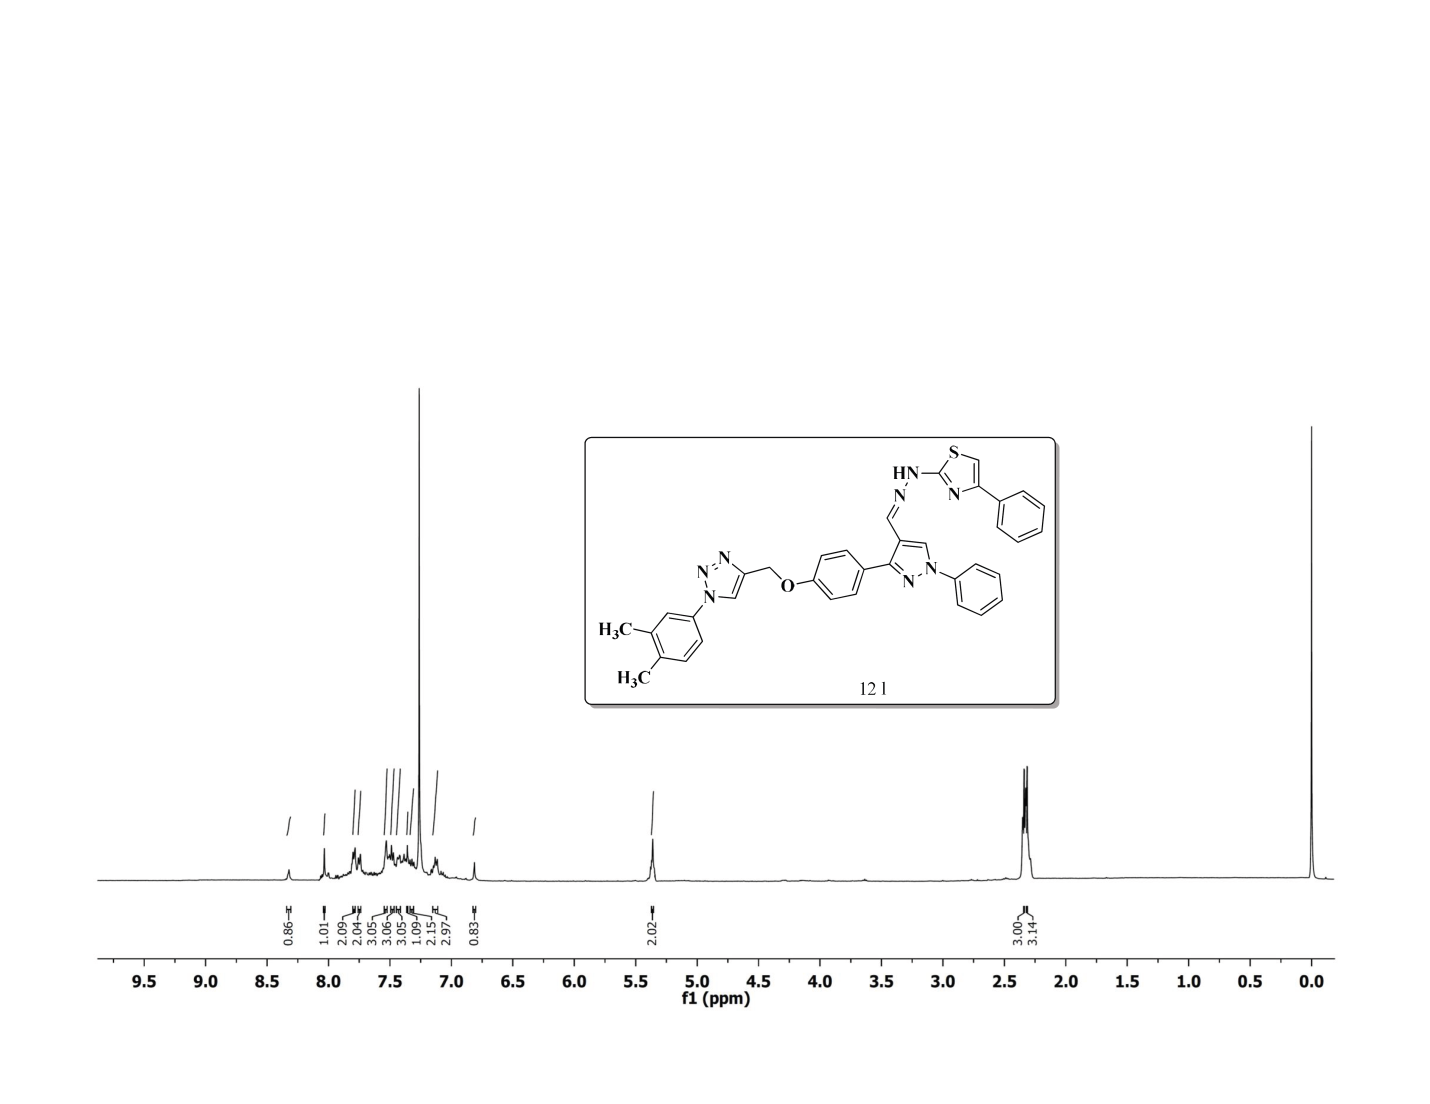
**1H NMR Spectrum of compound 12l (400 MHz, CDCl3)**


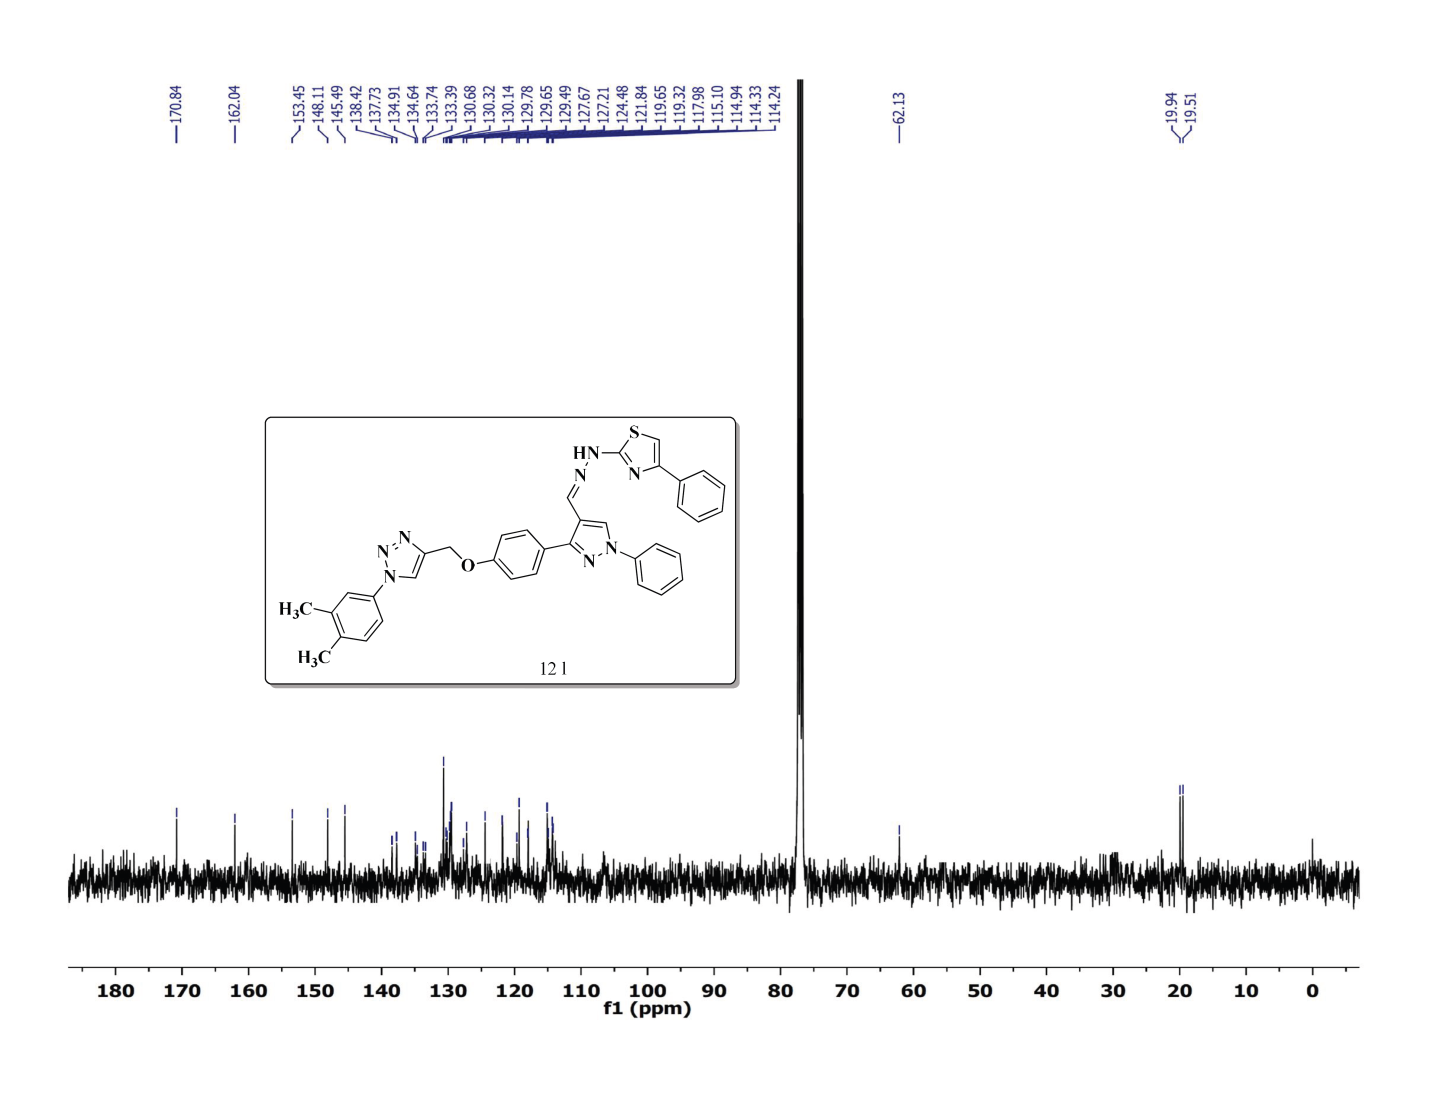
**13C NMR Spectrum of compound 12l (100 MHz, CDCl3)**


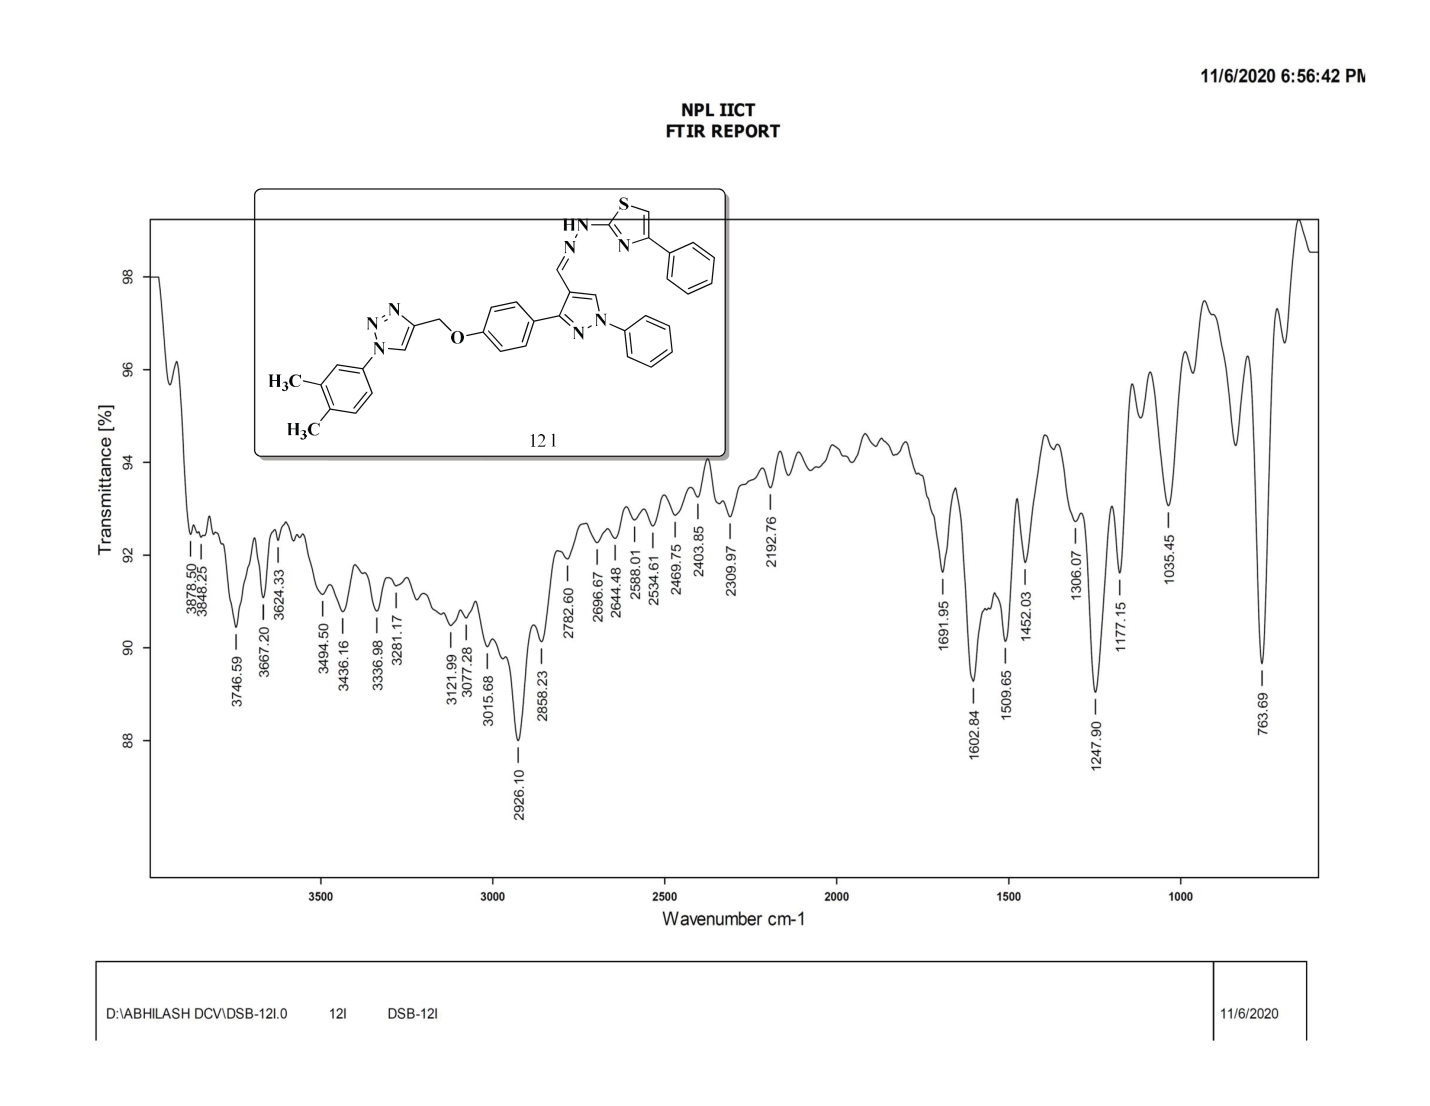
**FT-IR Spectrum of compound 12l**


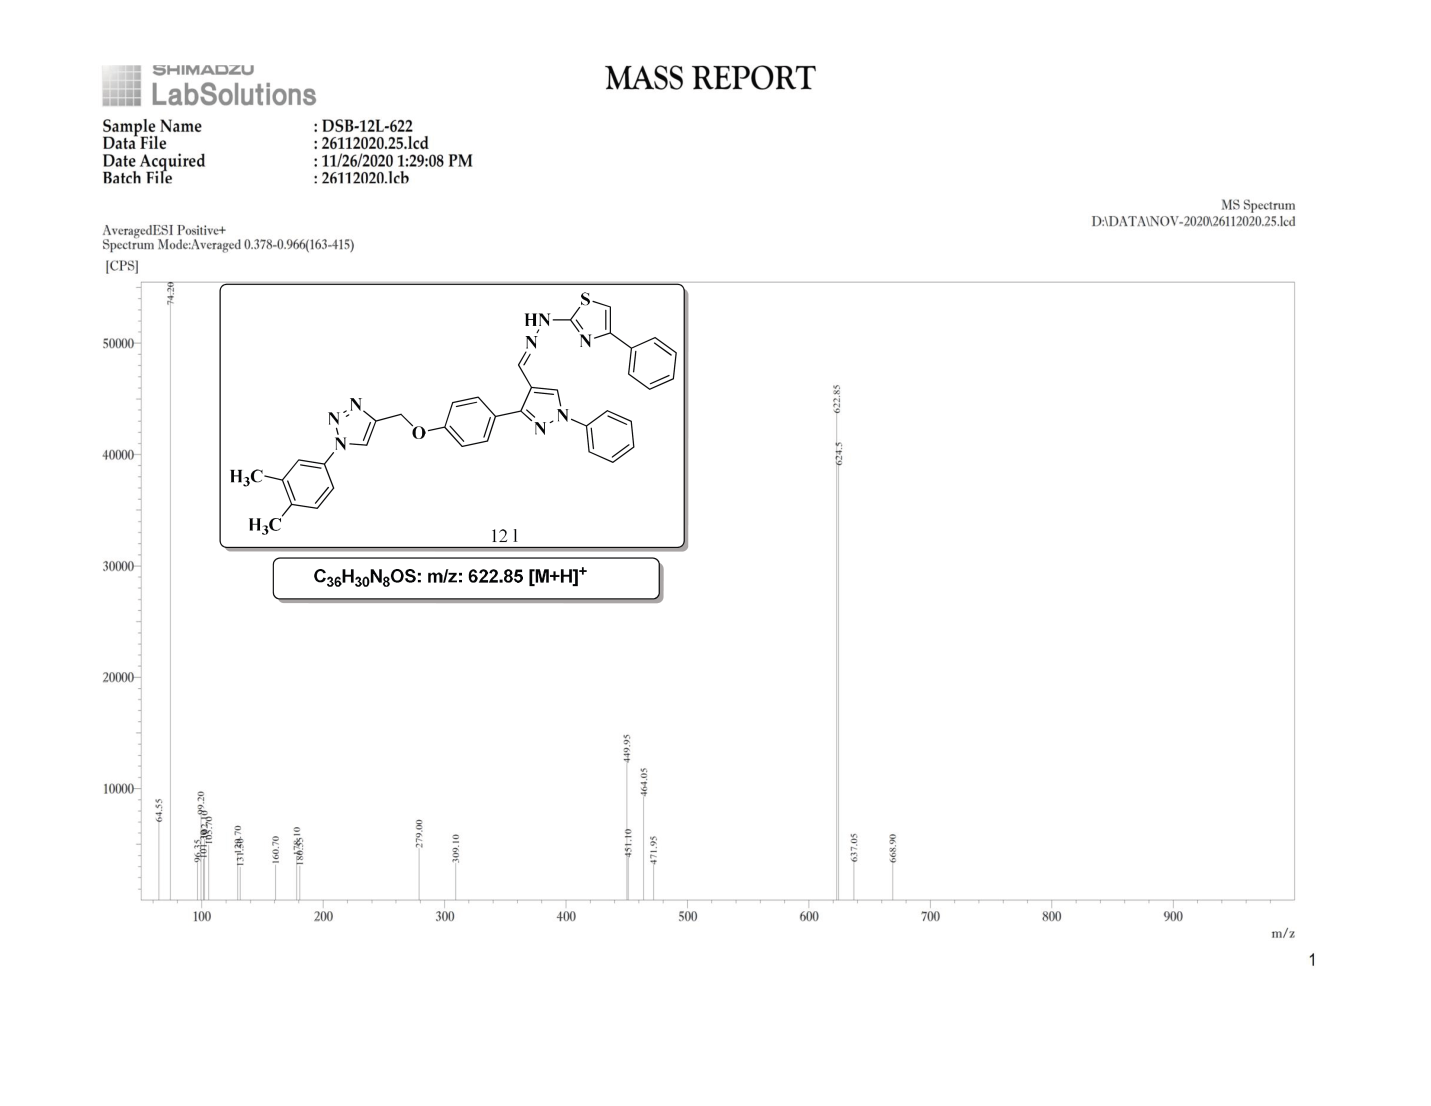
**ESI-Mass Spectrum of compound 12l**
